# Supplementary material for: Synthesis of seven-membered heterocycles via copper-catalyzed cross-coupling of terminal alkynes with diazo compounds and sequential Michael addition
Source: Royal Society of Chemistry journal article supplement (doi:10.1039/c7ob01091e), 2017-01-01

# Synthesis of Seven-Membered Heterocycles via Copper-Catalyzed Cross-Coupling of Terminal Alkynes with Diazo Compounds and Sequential Michael Addition

*Shenghu Yan, Shengyu Cao and Jiangtao Sun*

*Jiangsu Key Laboratory of Advanced Catalytic Materials & Technology, School of  
Petrochemical Engineering, Changzhou University  
Changzhou 213164, P. R. China.*

E-mail: [jtsun@cczu.edu.cn](mailto:jtsun@cczu.edu.cn) or [jtsun08@gmail.com](mailto:jtsun08@gmail.com);

## Table of Contents

1. General information
2. General procedure for table **2**
3. Control experiments for Scheme **2**
4. X-ray structure of **3e**
5. References
6. <sup>1</sup>H NMR and <sup>13</sup>C NMR Spectra of compounds

## General information

All of the reactions were carried out in flame-dried tube under argon atmosphere. Solvents were dried prior to use. For column chromatography, 200-300 mesh silica gel was used.  $^1\text{H}$  NMR were recorded on Bruker 300 MHz or 400 MHz spectrometer and  $^{13}\text{C}$  NMR were recorded on Bruker 100 MHz or 125MHz spectrometer in  $\text{CDCl}_3$ . HRMS were performed on Agilent 6540 Q-TOF mass spectrometer (ESI). Diazo compounds<sup>[1]</sup>, but-3-yn-1-yl sulfamate<sup>[2]</sup> and but-3-yn-1-yl carbamate<sup>[3]</sup> were known compounds and prepared according to the literature procedures.

## General procedure for table 2

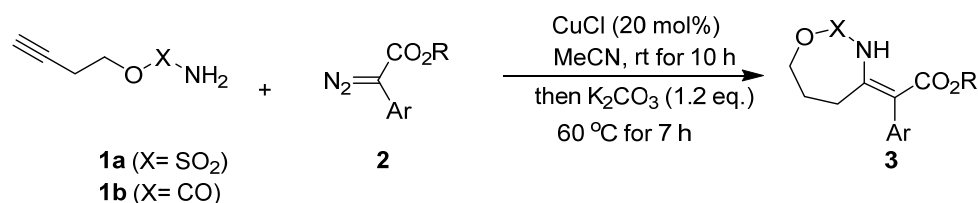

To a dry tube was added **1** (0.2 mmol), **2** (0.24 mmol), CuCl (0.04 mmol) and anhydrous MeCN (4 mL) under argon atmosphere, then the reaction mixture was stirred at room temperature under argon atmosphere for 10 h. Then K<sub>2</sub>CO<sub>3</sub> (0.24 mmol) was added and the reaction mixture was stirred at 60 °C under argon atmosphere for 7 h. The reaction mixture was cooled and concentrated under vacuum, the residue was purified by column chromatography (silica gel, eluted with EtOAc:Petroleum ether = 1:20-1:10) to give the desired product.

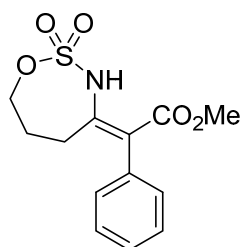

### *methyl (Z)-2-(2,2-dioxido-1,2,3-oxathiazepan-4-ylidene)-2-phenylacetate(3a):*

This compound was prepared via general procedure as a white solid (38 mg, yield: 65%), mp: 128-130 °C.

$^1\text{H}$  NMR (400 MHz,  $\text{CDCl}_3$ )  $\delta$  12.05 (s, 1H), 7.40-7.30 (m, 3H), 7.11 (d,  $J = 6.7$  Hz,

2H), 4.46-4.40 (m, 2H), 3.64 (s, 3H), 2.76-2.70 (m, 2H), 1.91 (dt,  $J = 10.4, 5.2$  Hz, 2H).  $^{13}\text{C}$  NMR (100 MHz,  $\text{CDCl}_3$ )  $\delta$  169.92, 150.85, 135.19, 130.88, 128.44, 127.66, 108.51, 72.48, 52.21, 28.83, 27.86. HRMS (ESI) calcd. for  $\text{C}_{13}\text{H}_{16}\text{NO}_5\text{S}$   $[\text{M}+\text{H}]^+$ : 298.0744, found: 298.0747.

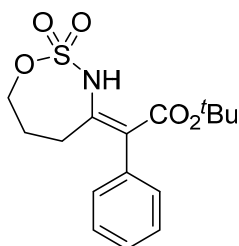

***tert-butyl (Z)-2-(2,2-dioxido-1,2,3-oxathiazepan-4-ylidene)-2-phenylacetate (3b):***

This compound was prepared via general procedure as a white solid (42 mg, yield: 63%), mp: 131-133 °C.

$^1\text{H}$  NMR (400 MHz,  $\text{CDCl}_3$ )  $\delta$  12.19 (s, 1H), 7.29 (dd,  $J = 12.8, 9.9$  Hz, 3H), 7.08 (d,  $J = 6.6$  Hz, 2H), 4.44-4.40 (m, 2H), 2.73 (d,  $J = 10.7$  Hz, 2H), 1.95-1.87 (m, 2H), 1.34 (s, 9H).  $^{13}\text{C}$  NMR (100 MHz,  $\text{CDCl}_3$ )  $\delta$  169.04, 149.33, 135.95, 130.78, 128.05, 127.13, 110.43, 81.90, 72.38, 28.94, 27.98, 27.95. HRMS (ESI) calcd. for  $\text{C}_{16}\text{H}_{22}\text{NO}_5\text{S}$   $[\text{M}+\text{H}]^+$ : 340.1213, found: 340.1210.

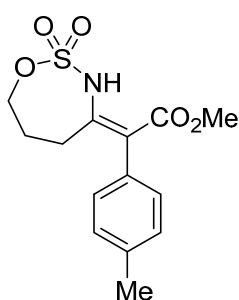

***methyl (Z)-2-(2,2-dioxido-1,2,3-oxathiazepan-4-ylidene)-2-(p-tolyl)acetate (3c):***

This compound was prepared via general procedure as a white solid (38 mg, yield: 61%), mp: 151-153 °C.

$^1\text{H}$  NMR (400 MHz,  $\text{CDCl}_3$ )  $\delta$  12.05 (s, 1H), 7.17 (d,  $J = 7.8$  Hz, 2H), 7.00 (d,  $J = 7.8$  Hz, 2H), 4.46-4.41 (m, 2H), 3.65 (s, 3H), 2.77-2.71 (m, 2H), 2.38 (s, 3H), 1.91 (dt,  $J = 10.5, 5.2$  Hz, 2H).  $^{13}\text{C}$  NMR (100 MHz,  $\text{CDCl}_3$ )  $\delta$  170.08, 150.76, 137.45, 132.11,

130.71, 129.19, 108.32, 72.47, 52.28, 28.80, 27.86, 21.27. HRMS (ESI) calcd. for  $C_{14}H_{18}NO_5S$   $[M+H]^+$ : 312.0900, found: 312.0904.

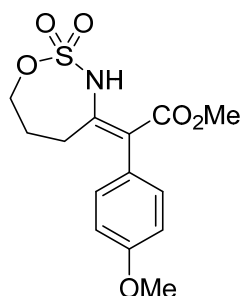

*methyl*

***(Z)-2-(2,2-dioxido-1,2,3-oxathiazepan-4-ylidene)-2-(4-methoxyphenyl)acetate (3d):***

This compound was prepared via general procedure as a white solid (36 mg, yield: 55%), mp: 123-125 °C.

$^1H$  NMR (400 MHz,  $CDCl_3$ )  $\delta$  12.05 (s, 1H), 7.03 (d,  $J = 8.6$  Hz, 2H), 6.89 (d,  $J = 8.6$  Hz, 2H), 4.46-4.42 (m, 2H), 3.83 (s, 3H), 3.65 (s, 3H), 2.78-2.73 (m, 2H), 1.94-1.88 (m, 2H).  $^{13}C$  NMR (125 MHz,  $CDCl_3$ )  $\delta$  174.64, 158.98, 150.88, 131.95, 113.84, 107.98, 72.45, 55.24, 52.28, 28.81, 27.85. HRMS (ESI) calcd. for  $C_{14}H_{18}NO_6S$   $[M+H]^+$ : 328.0849, found: 328.0846.

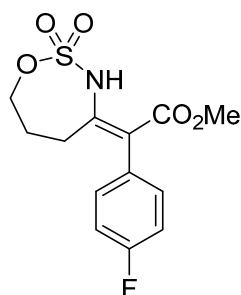

***methyl (Z)-2-(2,2-dioxido-1,2,3-oxathiazepan-4-ylidene)-2-(4-fluorophenyl)acetate (3e):***

This compound was prepared via general procedure as a white solid (46 mg, yield: 73%), mp: 126-128 °C.

$^1H$  NMR (400 MHz,  $CDCl_3$ )  $\delta$  12.05 (s, 1H), 7.12-7.00 (m, 4H), 4.47-4.42 (m, 2H), 3.65 (s, 3H), 2.76-2.71 (m, 2H), 1.92 (dt,  $J = 10.2, 5.1$  Hz, 2H).  $^{13}C$  NMR (100 MHz,  $CDCl_3$ )  $\delta$  169.78, 163.46, 161.01, 151.24, 132.59, 132.51, 131.03, 131.00, 115.61,

115.40, 107.35, 72.47, 52.31, 28.81, 27.74. HRMS (ESI) calcd. for  $C_{13}H_{15}FNO_5S$   $[M+H]^+$ : 316.0649, found: 316.0652.

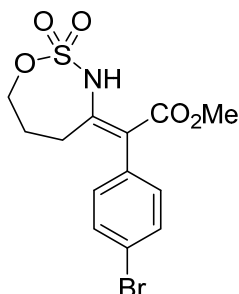

***methyl (Z)-2-(4-bromophenyl)-2-(2,2-dioxido-1,2,3-oxathiazepan-4-ylidene)acetate, hydrogen salt (3f):***

This compound was prepared via general procedure as a white solid (52 mg, yield: 70%), mp: 134-136 °C.

$^1H$  NMR (400 MHz,  $CDCl_3$ )  $\delta$  12.04 (s, 1H), 7.50 (d,  $J = 8.2$  Hz, 2H), 6.99 (d,  $J = 8.2$  Hz, 2H), 4.47-4.42 (m, 2H), 3.65 (s, 3H), 2.76-2.70 (m, 2H), 1.92 (dt,  $J = 10.3, 5.2$  Hz, 2H).  $^{13}C$  NMR (125 MHz,  $CDCl_3$ )  $\delta$  169.46, 151.19, 134.11, 132.60, 131.69, 121.94, 107.22, 72.44, 52.33, 28.82, 27.71. HRMS (ESI) calcd. for  $C_{13}H_{15}BrNO_5S$   $[M+H]^+$ : 375.9849, found: 375.9845.

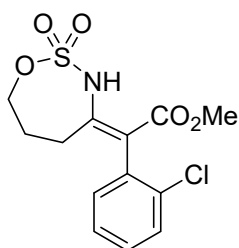

***methyl (Z)-2-(2-chlorophenyl)-2-(2,2-dioxido-1,2,3-oxathiazepan-4-ylidene)acetate (3g):***

This compound was prepared via general procedure as a colorless liquid (35 mg, yield: 53%).

$^1H$  NMR (400 MHz,  $CDCl_3$ )  $\delta$  12.08 (s, 1H), 7.44 (d,  $J = 8.8$  Hz, 1H), 7.30 (dd,  $J = 11.8, 6.4$  Hz, 2H), 7.16 (d,  $J = 6.4$  Hz, 1H), 4.44 (t,  $J = 4.8$  Hz, 2H), 3.65 (s, 3H), 2.79-2.55 (m, 2H), 2.05-1.90 (m, 2H).  $^{13}C$  NMR (125 MHz,  $CDCl_3$ )  $\delta$  169.11, 151.35,

134.13, 132.67, 129.55, 129.43, 126.90, 106.18, 105.75, 72.59, 52.32, 28.91, 27.39.

HRMS (ESI) calcd. for  $C_{13}H_{15}ClNO_5S$   $[M+H]^+$ : 332.0354, found: 332.0358.

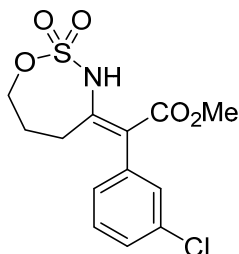

***methyl (Z)-2-(3-chlorophenyl)-2-((2,2-dioxido-1,2,3-oxathiazepan-4-ylidene)acetate (3h):***

This compound was prepared via general procedure as a colorless liquid (43 mg, yield: 66%).

$^1H$  NMR (400 MHz,  $CDCl_3$ )  $\delta$  12.04 (s, 1H), 7.32 (dd,  $J = 10.2, 4.2$  Hz, 2H), 7.13 (s, 1H), 7.03-6.98 (m, 1H), 4.48-4.41 (m, 2H), 3.66 (s, 3H), 2.78-2.69 (m, 2H), 1.93 (dt,  $J = 10.7, 5.4$  Hz, 2H).  $^{13}C$  NMR (125 MHz,  $CDCl_3$ )  $\delta$  169.43, 151.40, 136.95, 134.24, 130.98, 129.69, 129.16, 127.95, 107.18, 72.46, 52.37, 28.88, 27.72. HRMS (ESI) calcd. for  $C_{13}H_{15}ClNO_5S$   $[M+H]^+$ : 332.0354, found: 332.0351.

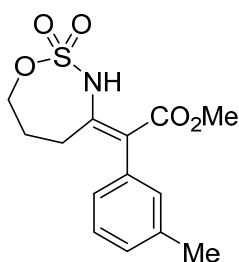

***methyl (Z)-2-(2-(2,2-dioxido-1,2,3-oxathiazepan-4-ylidene)-2-(m-tolyl)acetate (3i):***

This compound was prepared via general procedure as a white solid (31 mg, yield: 50%), mp: 135-137 °C.

$^1H$  NMR (400 MHz,  $CDCl_3$ )  $\delta$  12.05 (s, 1H), 7.27-7.23 (m, 1H), 7.15 (d,  $J = 7.6$  Hz, 1H), 6.91 (d,  $J = 9.5$  Hz, 2H), 4.46-4.41 (m, 2H), 3.65 (s, 3H), 2.76-2.71 (t, 2H), 2.36 (s, 3H), 1.95-1.87 (m, 2H).  $^{13}C$  NMR (100 MHz,  $CDCl_3$ )  $\delta$  170.02, 150.72, 138.11,

135.02, 131.53, 128.46, 128.30, 127.87, 108.55, 72.50, 52.30, 28.86, 27.86, 21.45.

HRMS (ESI) calcd. for  $C_{14}H_{18}NO_5S$   $[M+H]^+$ : 312.0900, found: 312.0903.

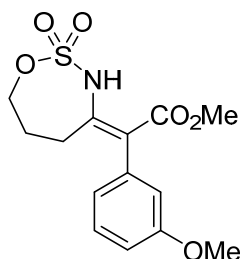

*methyl*

**(Z)-2-(2,2-dioxido-1,2,3-oxathiazepan-4-ylidene)-2-(3-methoxyphenyl)acetate (3j):**

This compound was prepared via general procedure as a colorless liquid (35 mg, yield: 53%).

$^1H$  NMR (400 MHz,  $CDCl_3$ )  $\delta$  12.04 (s, 1H), 7.29 (d,  $J = 7.9$  Hz, 1H), 6.88 (d,  $J = 8.3$  Hz, 1H), 6.73-6.63 (m, 2H), 4.46-4.42 (m, 2H), 3.81 (s, 3H), 3.65 (s, 3H), 2.77-2.72 (m, 2H), 1.92 (dt,  $J = 10.3, 5.1$  Hz, 2H).  $^{13}C$  NMR (100 MHz,  $CDCl_3$ )  $\delta$  169.85, 159.50, 150.85, 136.46, 129.44, 123.22, 116.71, 112.93, 108.24, 72.50, 55.26, 52.30, 28.82, 27.88. HRMS (ESI) calcd. for  $C_{14}H_{18}NO_6S$   $[M+H]^+$ : 328.0849, found: 328.0851.

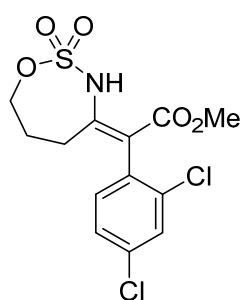

*methyl*

**(Z)-2-(2,4-dichlorophenyl)-2-(2,2-dioxido-1,2,3-oxathiazepan-4-ylidene)acetate**

**(3k):**

This compound was prepared via general procedure as a white solid (44 mg, yield: 60%), mp: 124-126 °C.

$^1\text{H}$  NMR (400 MHz,  $\text{CDCl}_3$ )  $\delta$  12.06 (s, 1H), 7.46 (d,  $J = 2.0$  Hz, 1H), 7.30-7.24 (m, 1H), 7.09 (d,  $J = 8.2$  Hz, 1H), 4.49-4.42 (m, 2H), 3.65 (s, 3H), 2.76-2.58 (m, 2H), 2.08-1.82 (m, 2H).  $^{13}\text{C}$  NMR (125 MHz,  $\text{CDCl}_3$ )  $\delta$  168.79, 151.80, 136.28, 134.68, 133.42, 132.74, 129.51, 127.34, 104.60, 72.58, 52.37, 28.94, 27.33. HRMS (ESI) calcd. for  $\text{C}_{13}\text{H}_{14}\text{Cl}_2\text{NO}_5\text{S}$   $[\text{M}+\text{H}]^+$ : 365.9964, found: 365.9967.

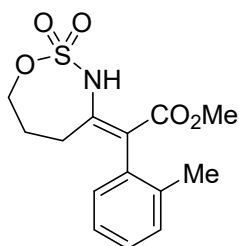

***methyl (Z)-2-(2,2-dioxido-1,2,3-oxathiazepan-4-ylidene)-2-(o-tolyl)acetate (3l):***

This compound was prepared via general procedure as colorless liquid (28 mg, yield: 45%).

$^1\text{H}$  NMR (400 MHz,  $\text{CDCl}_3$ )  $\delta$  12.06 (s, 1H), 7.30-7.16 (m, 4H), 7.01 (d,  $J = 7.5$  Hz, 1H), 4.47-4.40 (m, 2H), 3.64 (s, 3H), 2.73-2.57 (m, 2H), 2.14 (s, 3H), 1.95-1.85 (m, 2H).  $^{13}\text{C}$  NMR (100 MHz,  $\text{CDCl}_3$ )  $\delta$  169.77, 150.47, 137.87, 134.55, 130.98, 130.12, 128.15, 126.01, 107.17, 72.52, 52.29, 28.67, 27.64, 19.91. HRMS (ESI) calcd. for  $\text{C}_{14}\text{H}_{18}\text{NO}_5\text{S}$   $[\text{M}+\text{H}]^+$ : 312.0900, found: 312.0903.

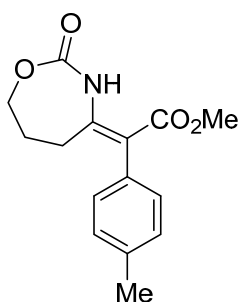

***methyl (Z)-2-(2-oxo-1,3-oxazepan-4-ylidene)-2-(p-tolyl)acetate (3o):***

This compound was prepared via general procedure as a colorless liquid (34 mg, yield: 61%).

$^1\text{H}$  NMR (400 MHz,  $\text{CDCl}_3$ )  $\delta$  7.19-7.10 (m, 4H), 4.20 (t,  $J = 7.0$  Hz, 2H), 3.66 (s, 3H), 3.27 (t,  $J = 7.8$  Hz, 2H), 2.35 (s, 3H), 2.18-2.08 (m, 2H).  $^{13}\text{C}$  NMR (100 MHz,



CDCl<sub>3</sub>)  $\delta$  175.86, 172.32, 158.15, 136.33, 132.43, 130.34, 129.76, 128.68, 72.21, 51.31, 31.60, 24.15, 21.33. HRMS (ESI) calcd. for C<sub>15</sub>H<sub>18</sub>NO<sub>4</sub> [M+H]<sup>+</sup>: 276.1230, found: 276.1233.

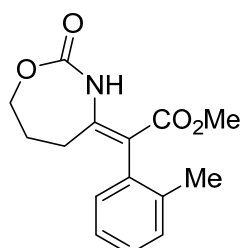

***methyl (Z)-2-(2-oxo-1,3-oxazepan-4-ylidene)-2-(o-tolyl)acetate (3p):***

This compound was prepared via general procedure as a colorless liquid (29 mg, yield: 52%).

<sup>1</sup>H NMR (300 MHz, CDCl<sub>3</sub>)  $\delta$  7.24-7.15 (m, 3H), 7.11 (d, *J* = 5.3 Hz, 1H), 4.19 (t, *J* = 7.0 Hz, 2H), 3.62 (s, 3H), 3.30 (t, *J* = 7.8 Hz, 2H), 2.19-2.09 (m, 5H). <sup>13</sup>C NMR (100 MHz, CDCl<sub>3</sub>)  $\delta$  181.33, 167.67, 133.17, 130.81, 129.70, 127.35, 125.45, 72.21, 51.29, 31.28, 24.13, 19.74. HRMS (ESI) calcd. for C<sub>15</sub>H<sub>18</sub>NO<sub>4</sub> [M+H]<sup>+</sup>: 276.1230, found: 276.1234.

**Control experiments for Scheme 2**

1. Scheme 2-a

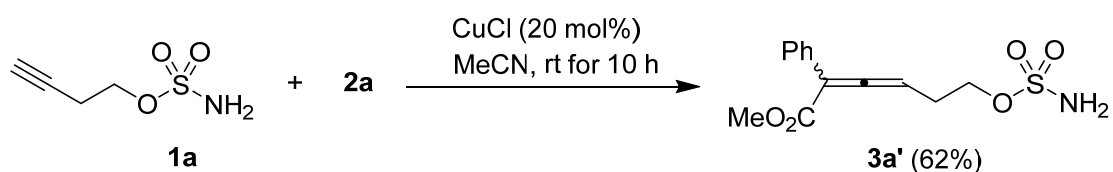

To a dry tube was added **1** (0.2 mmol), **2a** (0.24 mmol), CuCl (0.04 mmol) and anhydrous MeCN (4 mL) under argon atmosphere, then the reaction mixture was stirred at room temperature under argon atmosphere for 10 h. The reaction mixture was concentrated under vacuum, the residue was purified by column chromatography (silica gel, eluted with EtOAc:Petroleum ether = 1:10-1:5) to give **3a'** (29 mg, yield: 52%) as colorless liquid. <sup>1</sup>H NMR (300 MHz, CDCl<sub>3</sub>) 7.49-7.46 (m, 2H), 7.40-7.31 (m, 3H), 5.86 (t, *J* = 6.7 Hz, 1H), 4.79 (s, 2H), 4.35 (t, *J* = 5.8 Hz, 2H), 3.84 (s, 3H),

2.70-2.61 (m, 2H).  $^{13}\text{C}$  NMR (75 MHz,  $\text{CDCl}_3$ )  $\delta$  211.93, 166.85, 132.17, 128.46, 128.43, 127.99, 104.60, 91.86, 68.92, 52.74, 27.73. HRMS (ESI) calcd. for  $\text{C}_{13}\text{H}_{16}\text{NO}_5\text{S}$   $[\text{M}+\text{H}]^+$ : 298.0744, found: 298.0741.

## 2. Scheme 2-b

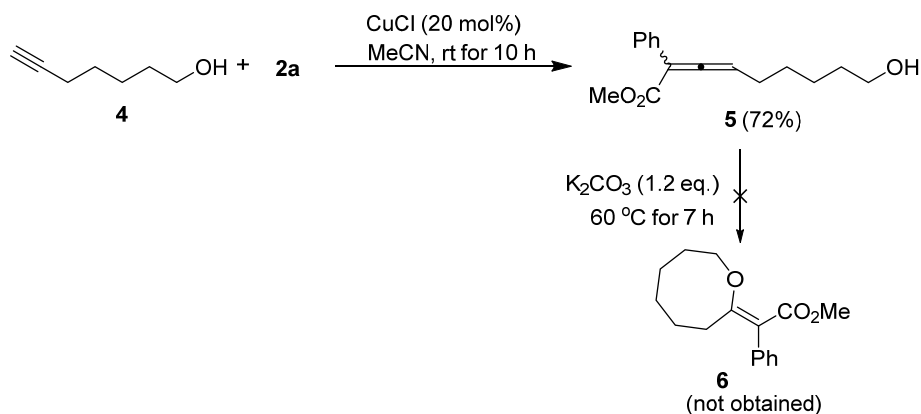

To a dry tube was added **4** (0.2 mmol), **2a** (0.24 mmol), CuCl (0.04 mmol) and anhydrous MeCN (4 mL) under argon atmosphere, then the reaction mixture was stirred at room temperature under argon atmosphere for 10 h. The reaction mixture was concentrated under vacuum, the residue was purified by column chromatography (silica gel, eluted with EtOAc:Petroleum ether = 1:10-1:5) to give **5** (37 mg, yield: 72%) as colorless liquid.  $^1\text{H}$  NMR (400 MHz,  $\text{CDCl}_3$ )  $\delta$  7.52-7.46 (m, 2H), 7.37-7.31 (m, 2H), 7.30-7.26 (m, 1H), 5.81 (t,  $J = 6.9$  Hz, 1H), 3.81 (s, 3H), 3.61 (t,  $J = 6.4$  Hz, 2H), 2.25 (q,  $J = 7.1$  Hz, 2H), 1.60-1.53 (m, 4H), 1.48-1.40 (m, 2H), 1.33 (s, 1H).  $^{13}\text{C}$  NMR (100 MHz,  $\text{CDCl}_3$ )  $\delta$  211.69, 166.98, 133.03, 128.39, 128.26, 127.52, 103.12, 96.03, 62.87, 52.34, 32.44, 28.49, 27.95, 25.12. HRMS (ESI) calcd. for  $\text{C}_{16}\text{H}_{21}\text{O}_3$   $[\text{M}+\text{H}]^+$ : 261.1485, found: 261.1483.

## X-ray structure of 3e

The crystal structures have been deposited at the Cambridge Crystallographic Data Centre (CCDC 1547742, **3e**). The data can be obtained free of charge via the internet at [www.ccdc.cam.ac.uk/data\\_request/cif](http://www.ccdc.cam.ac.uk/data_request/cif).

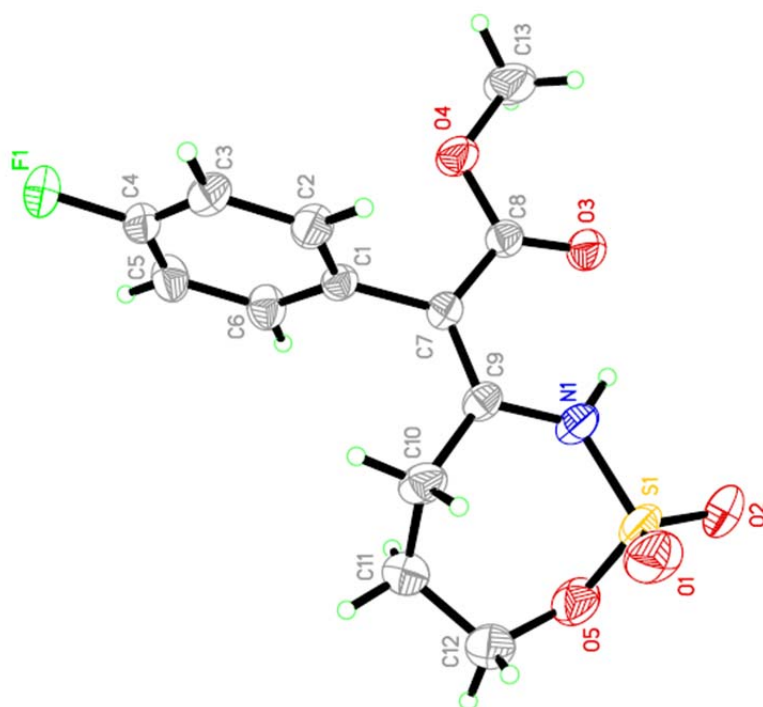

## References:

- [1] H. Keipour, A. Jalba, L. Delage-Laurin, T. Ollevier, *J. Org. Chem.* **2017**, *82*, 3000.
- [2] K. M. Erixon, C. L. Dabalos, F. J. Leeper, *Org. Biomol. Chem.* **2004**, *2*, 1732.
- [3] R. D. Grigg, J. W. Rigoli, S. Pearce, J. M. Schomaker, *Org. Lett.* **2012**, *14*, 280.

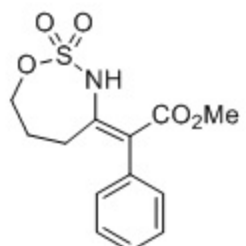

3a

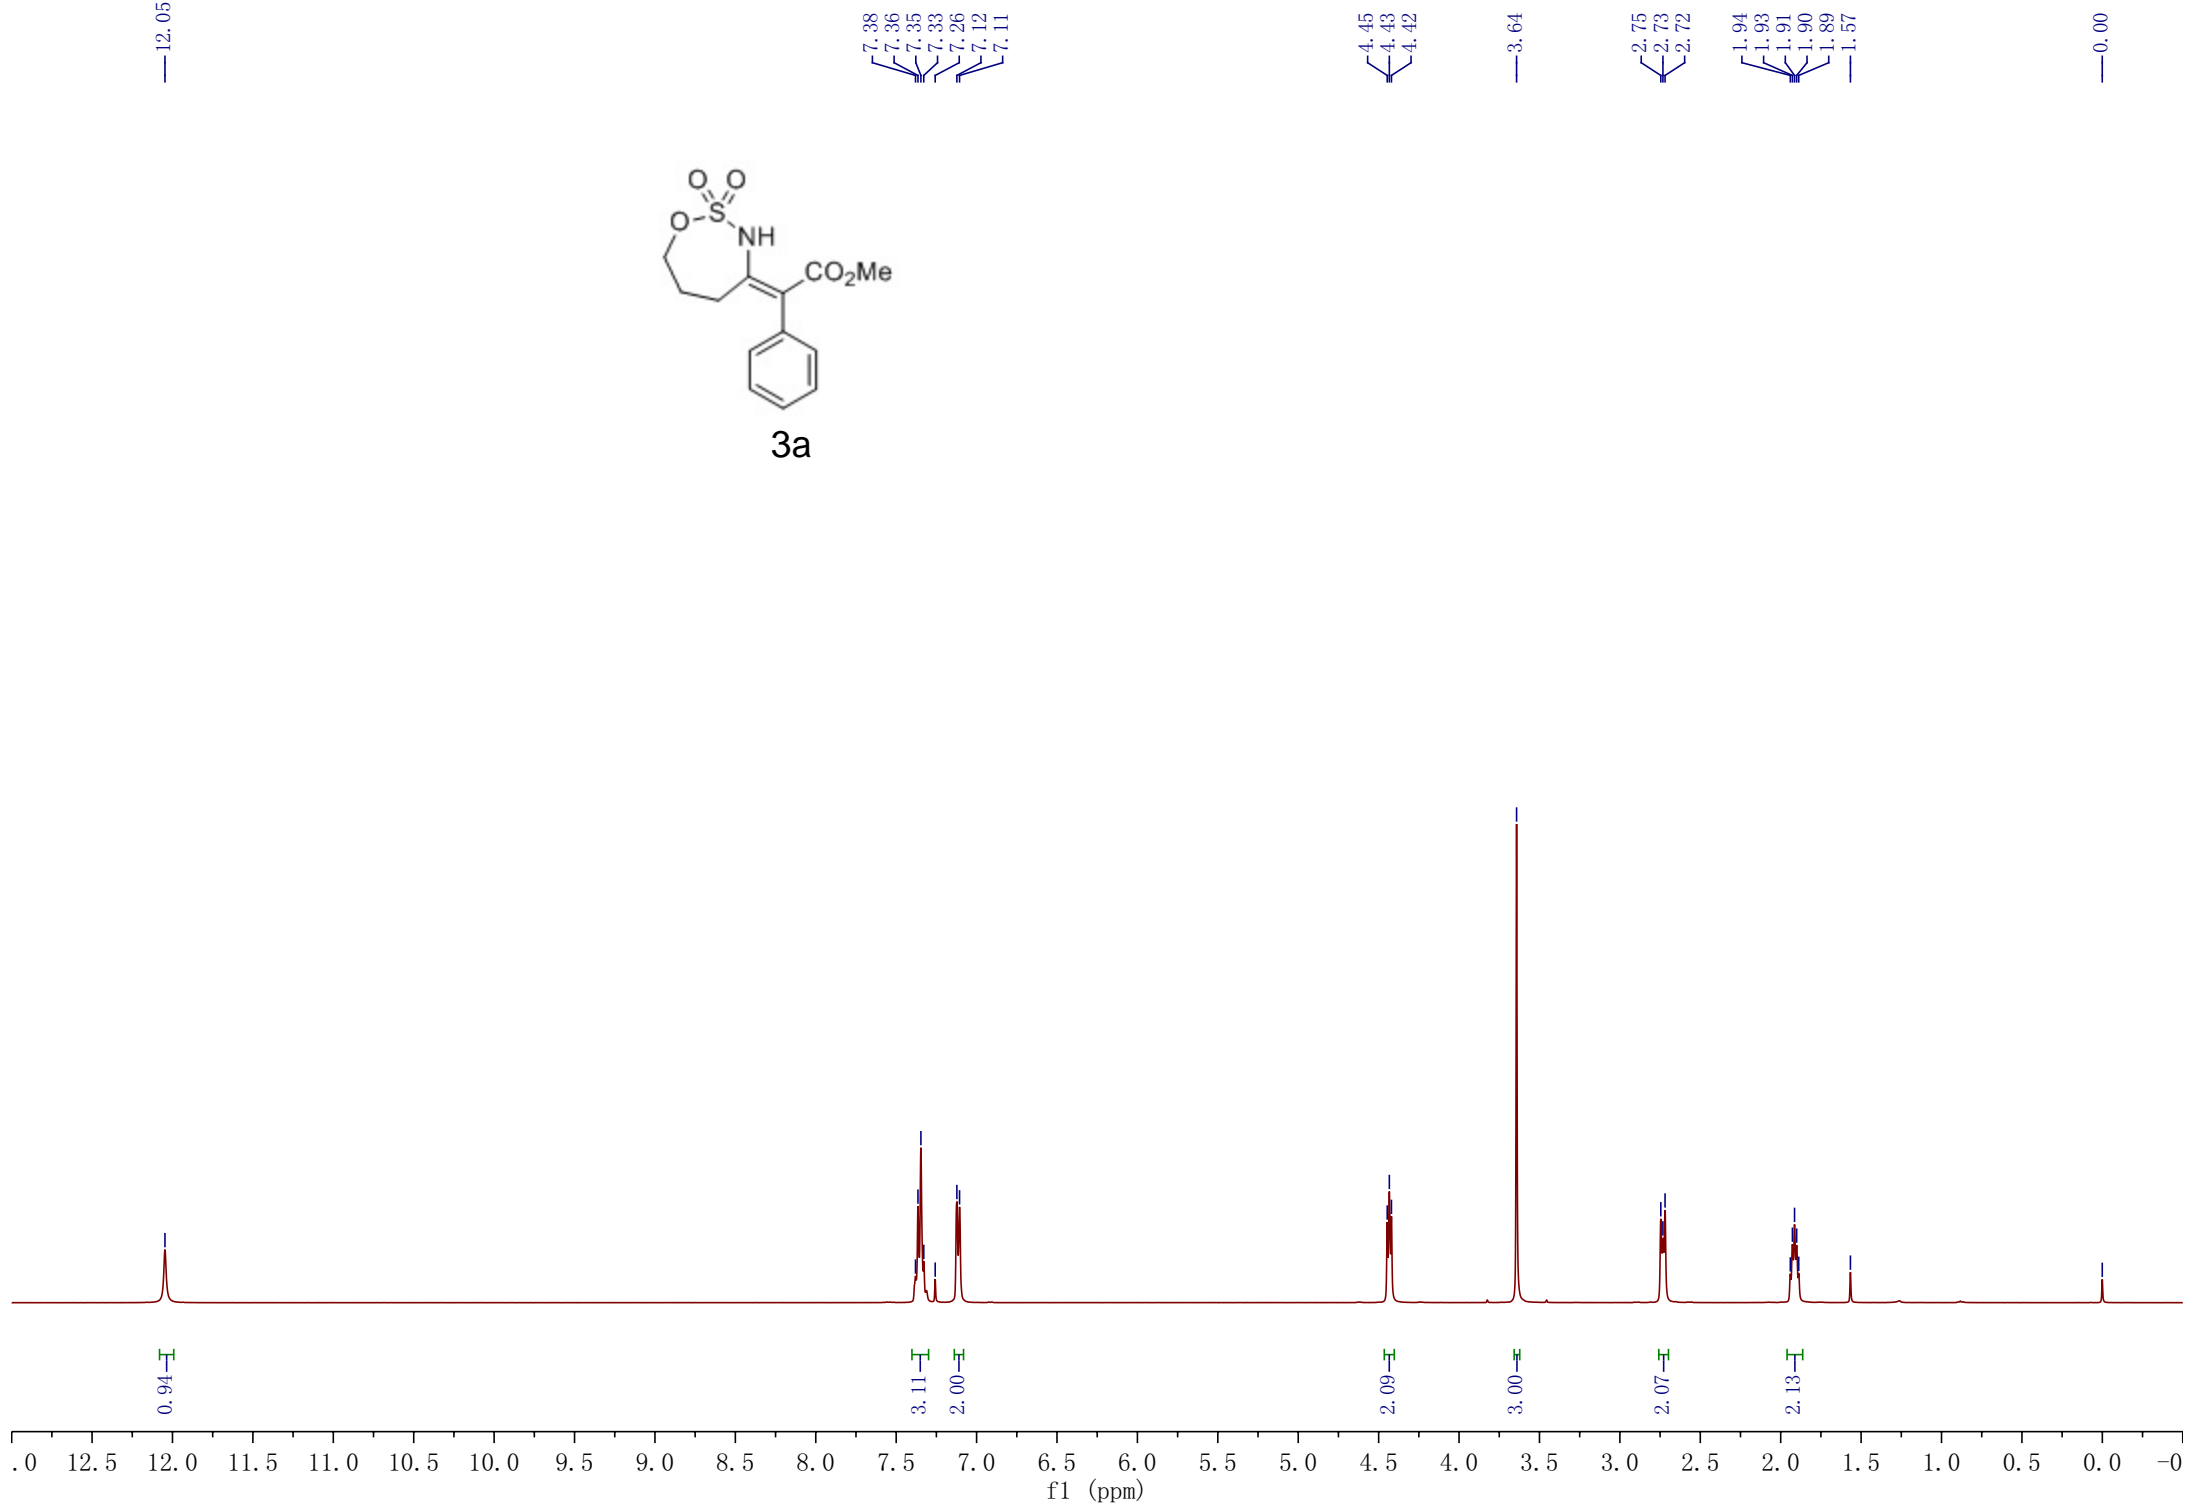

169.92

150.85

135.19

130.88

128.44

127.66

108.51

77.37

77.05

76.73

72.48

52.21

28.83

27.86

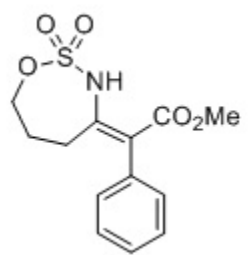

3a

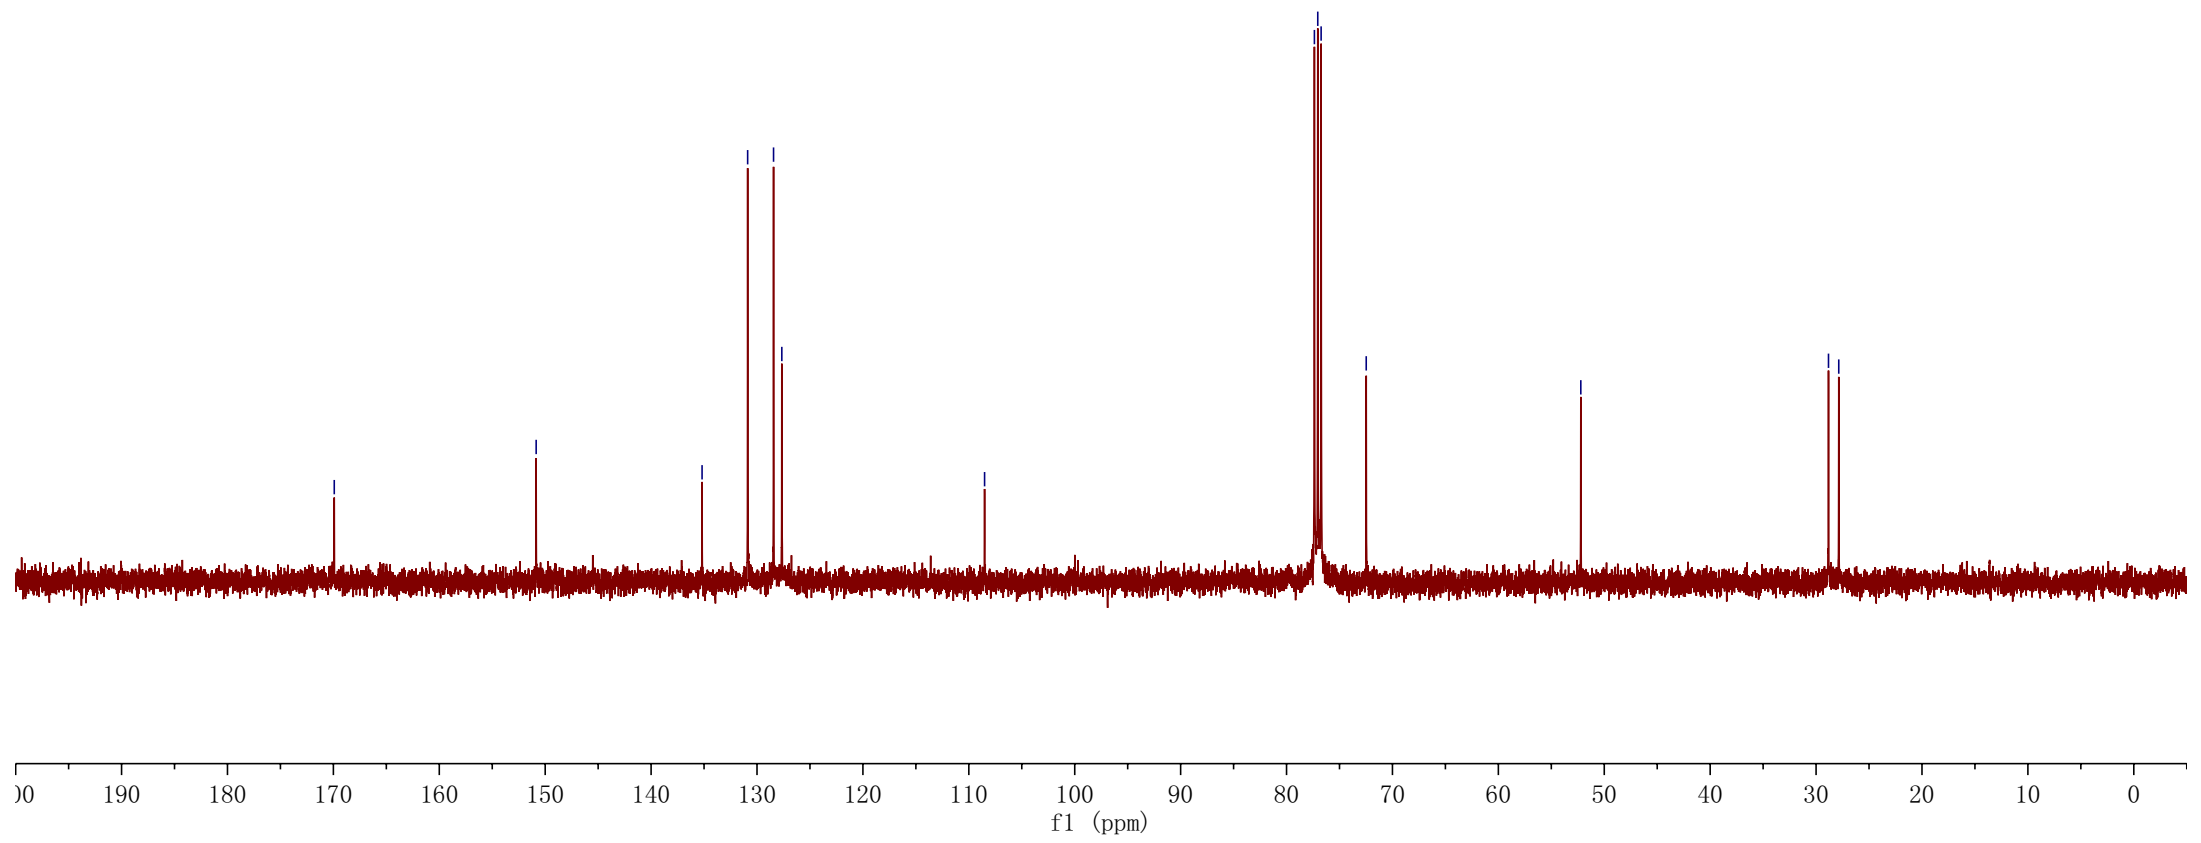

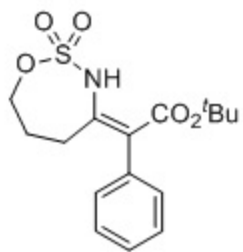

3b

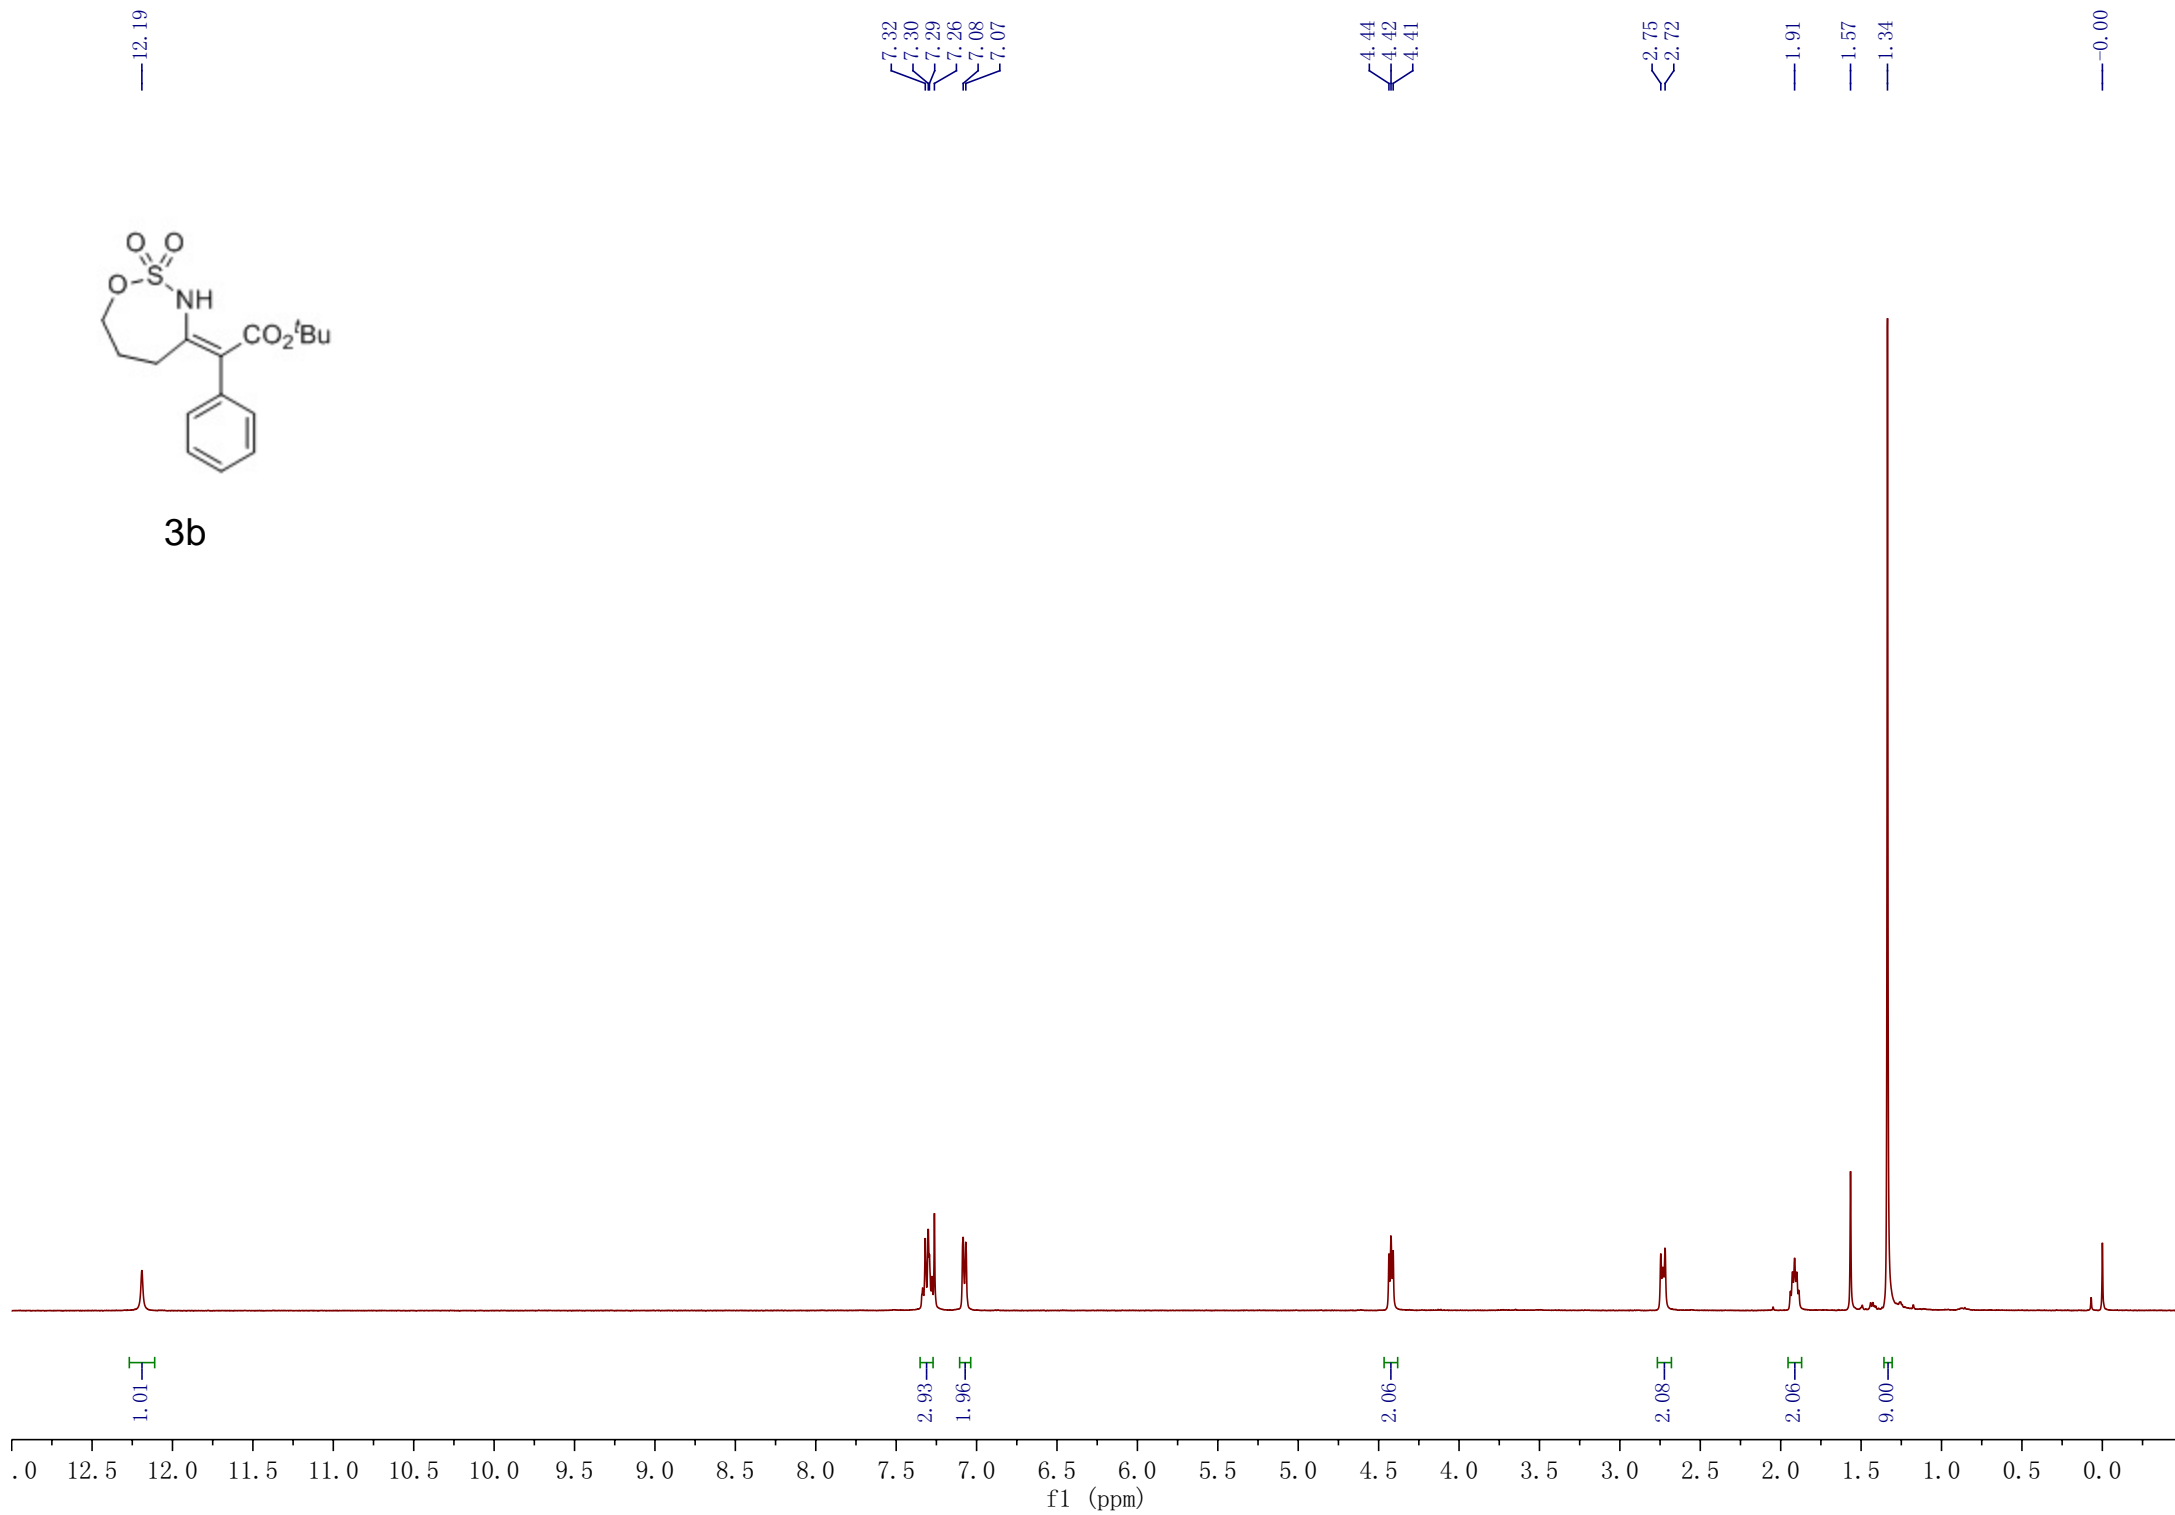

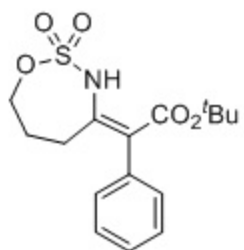

3b

—169.04

—149.33

~135.95

~130.78

~128.05

~127.13

—110.43

~81.90

~77.36

~77.05

~76.73

~72.38

~28.94

~27.98

~27.95

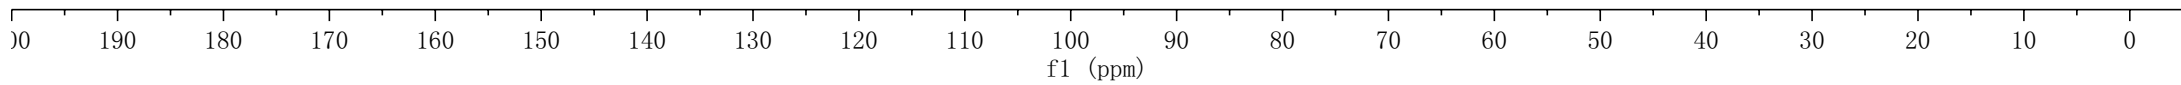

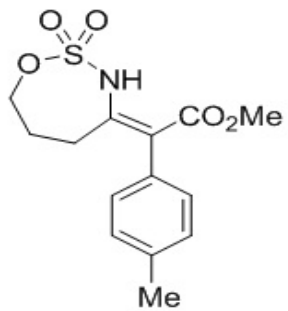

3c

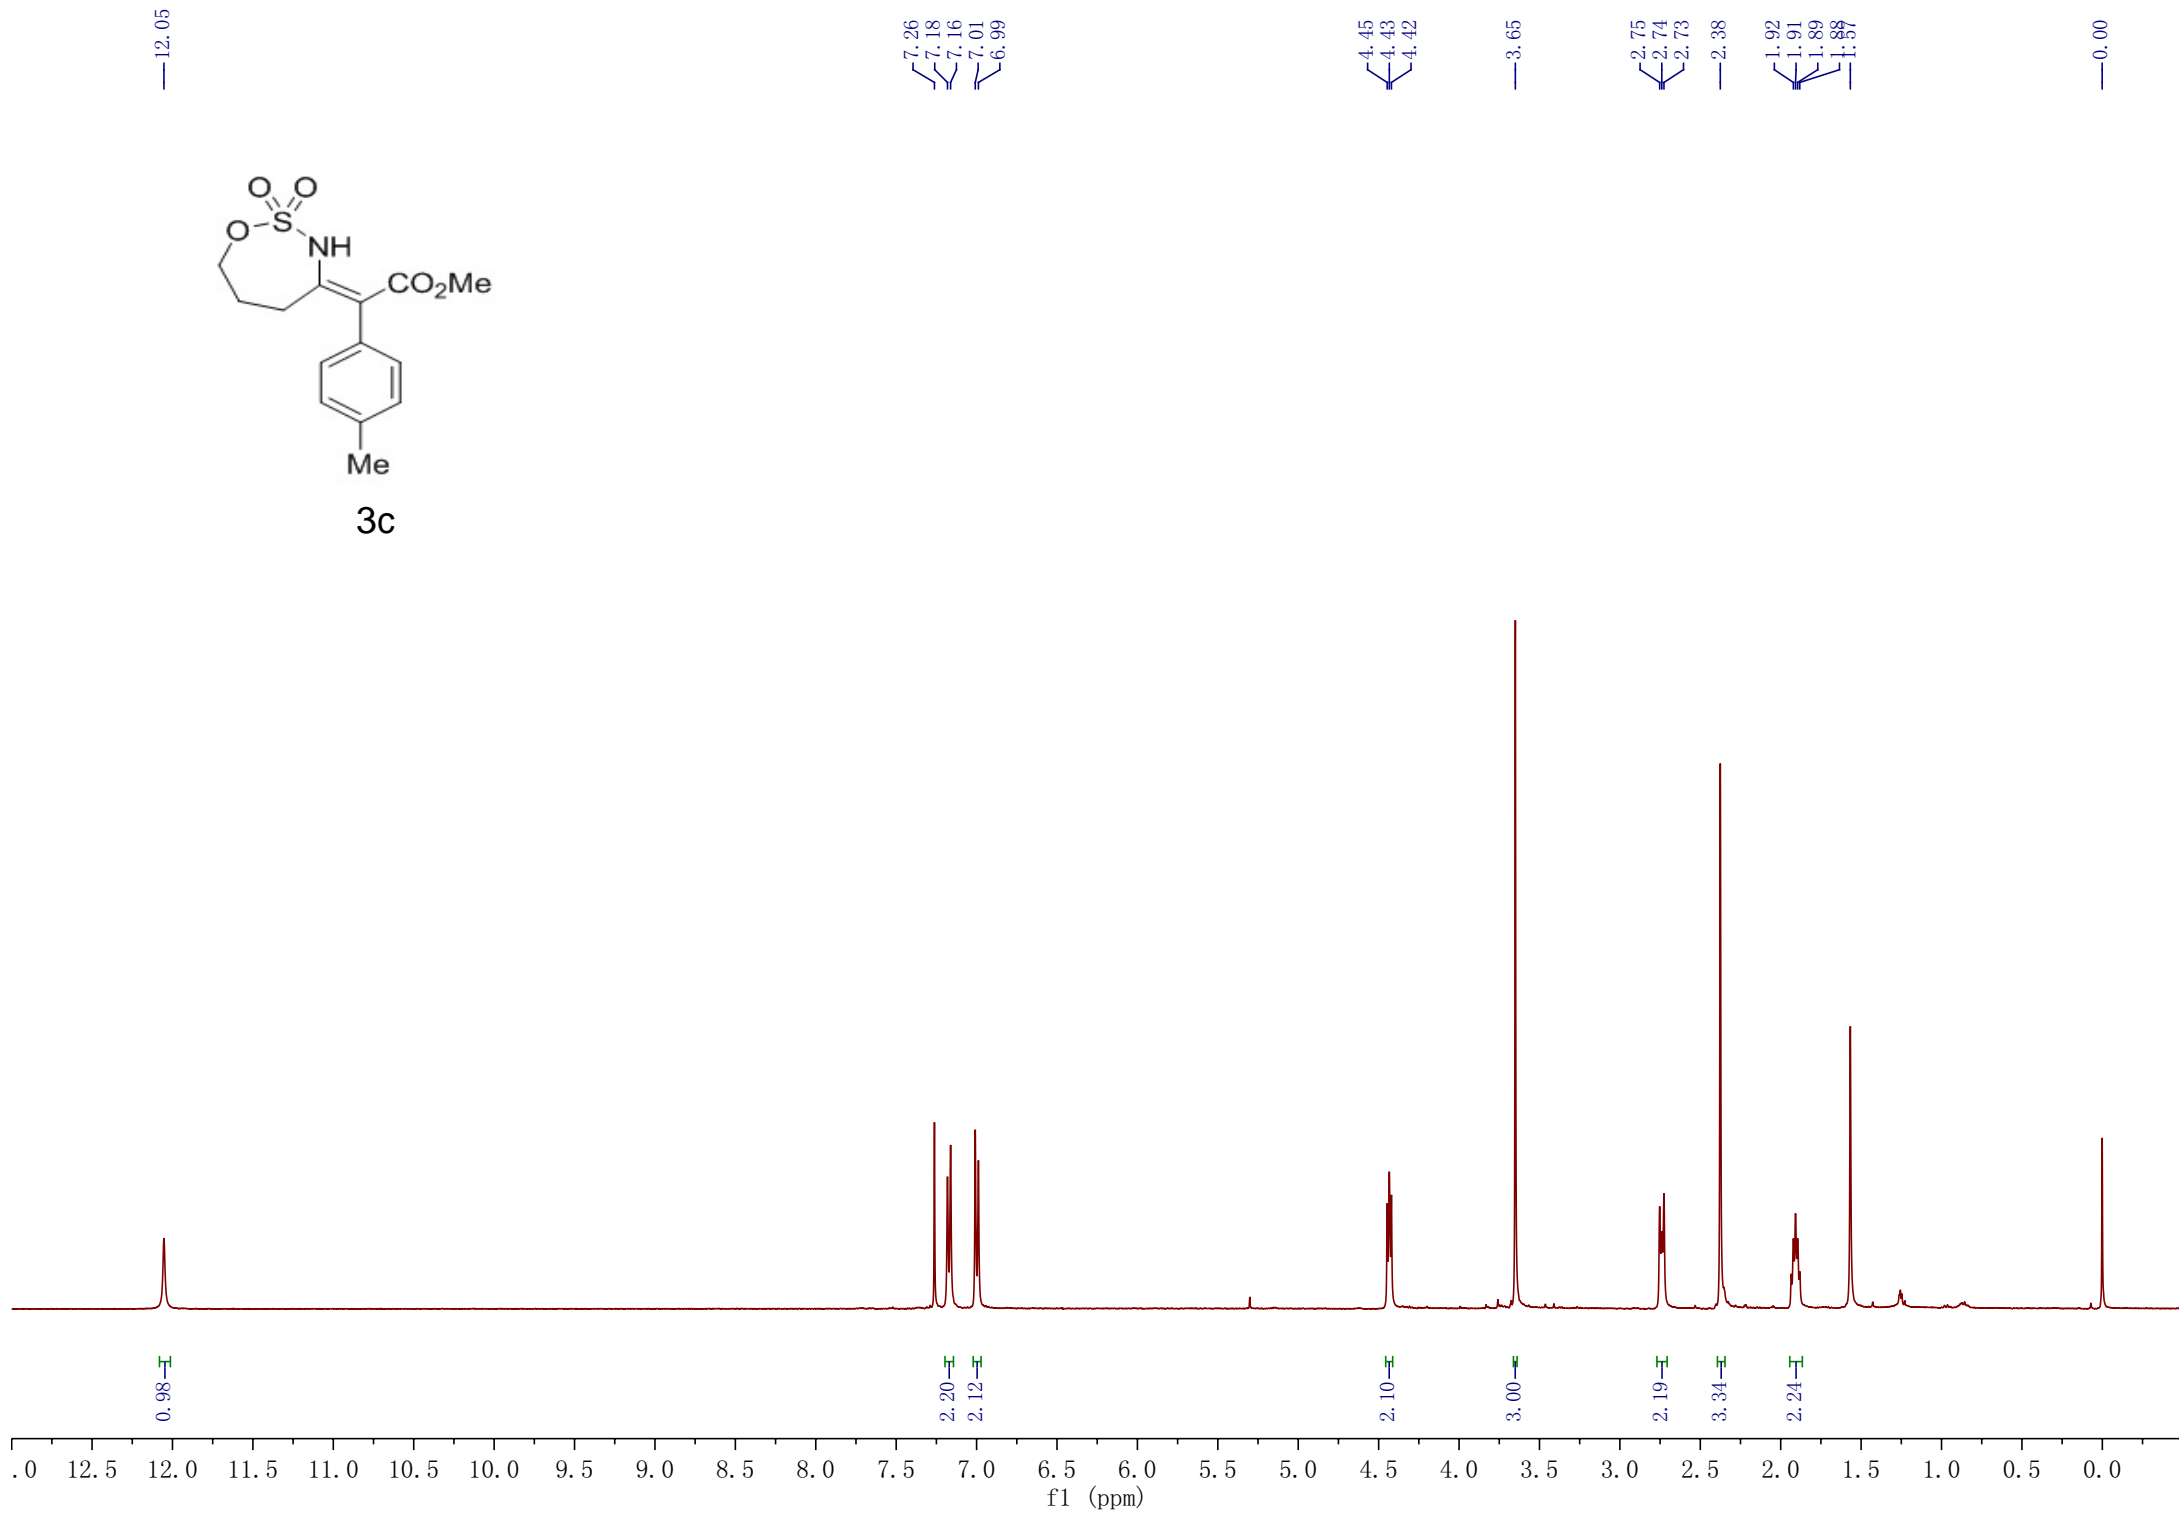



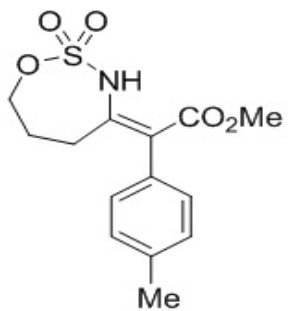

3c

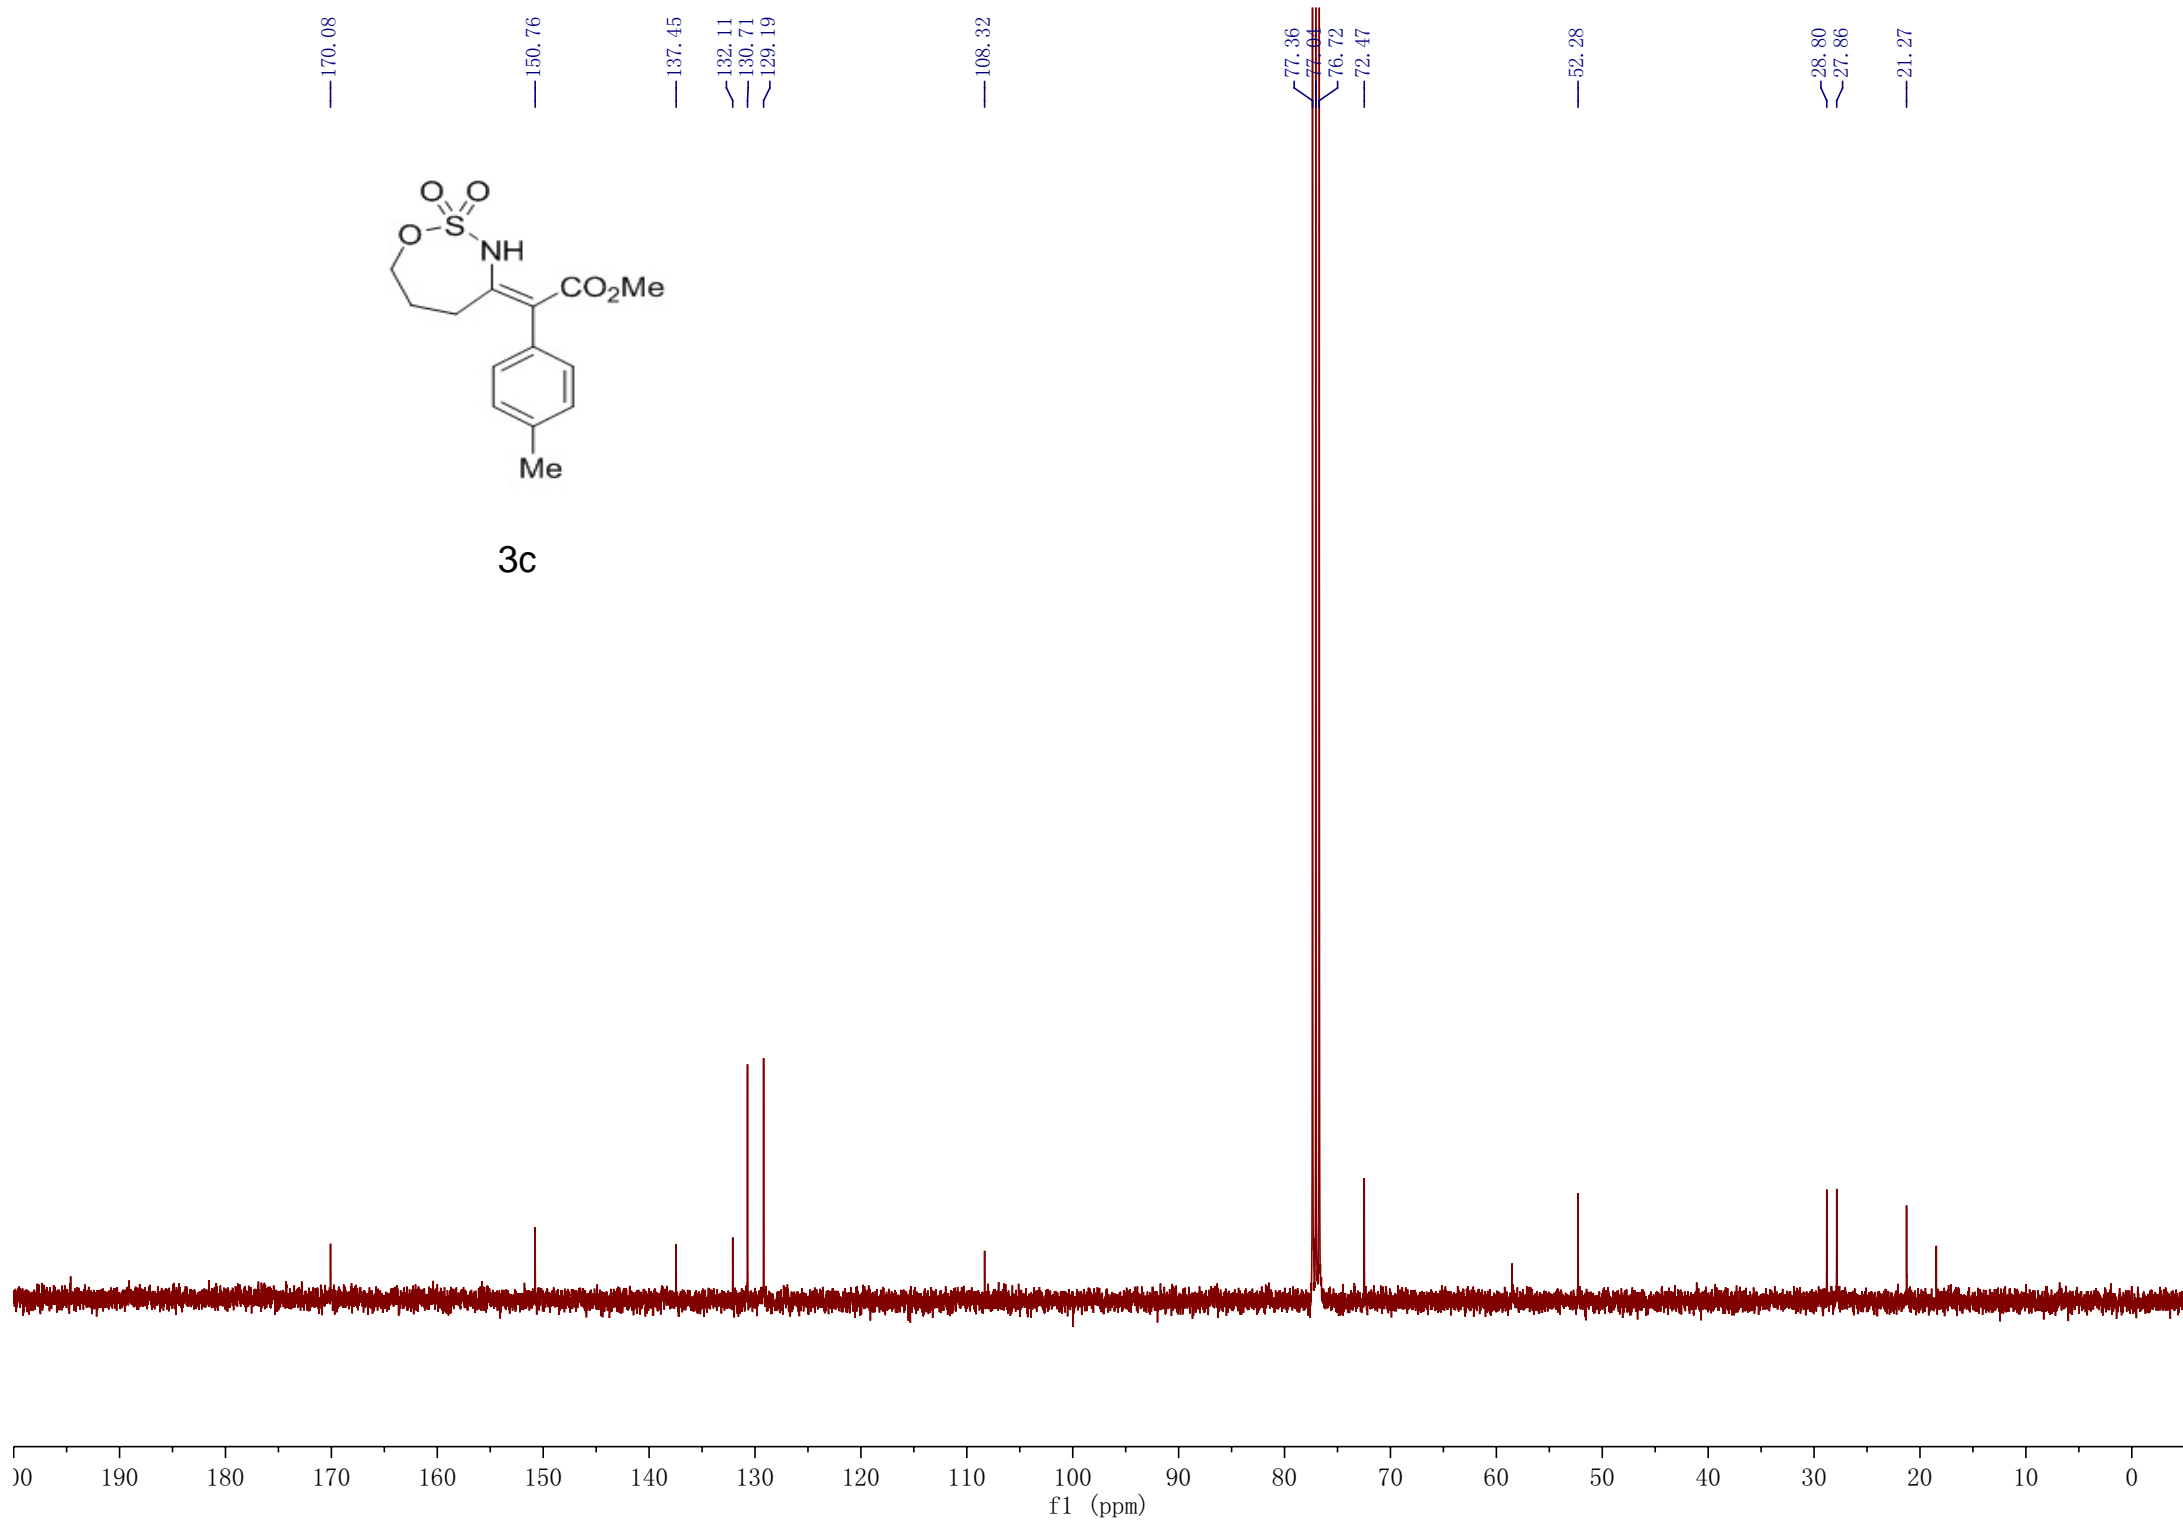

— 12.05

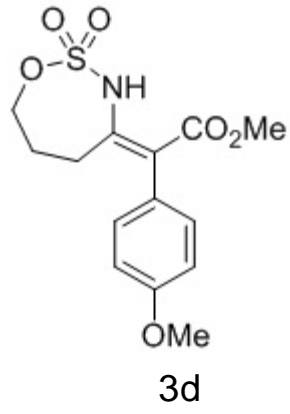

7.26  
7.04  
7.01  
6.90  
6.88

4.45  
4.44  
4.42

3.83  
3.65

2.77  
2.75  
2.74

1.92  
1.91  
1.90  
1.55  
1.25

— -0.00

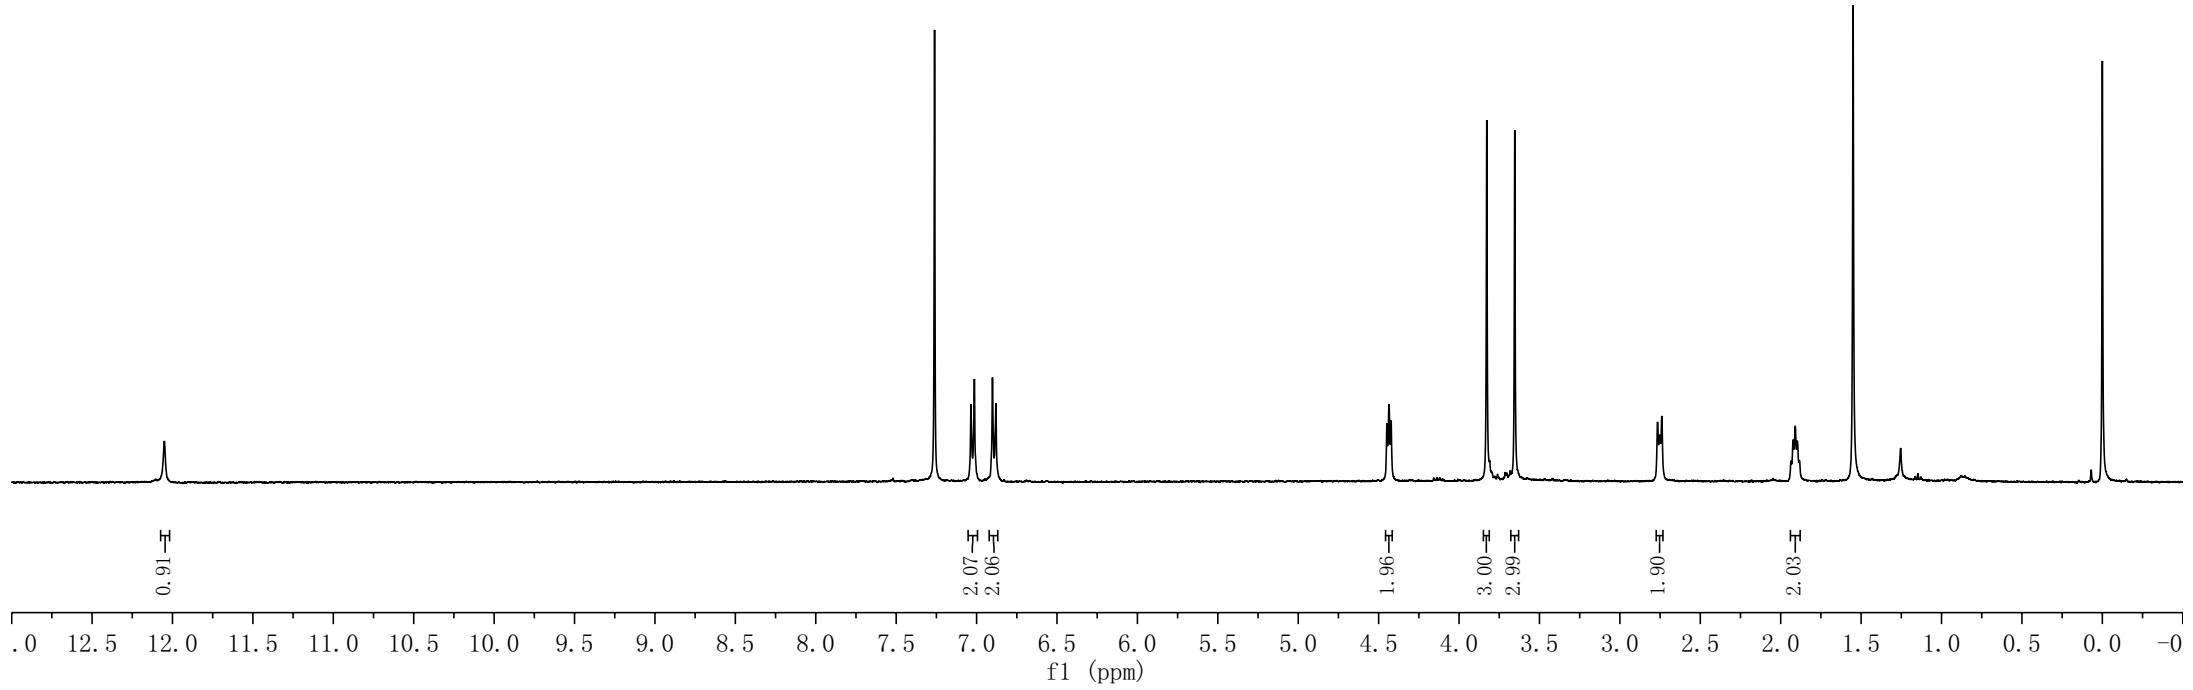

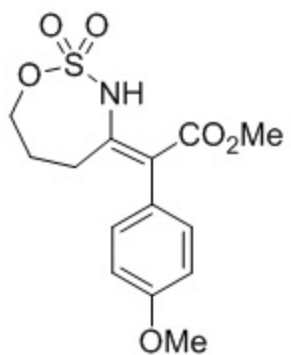

3d

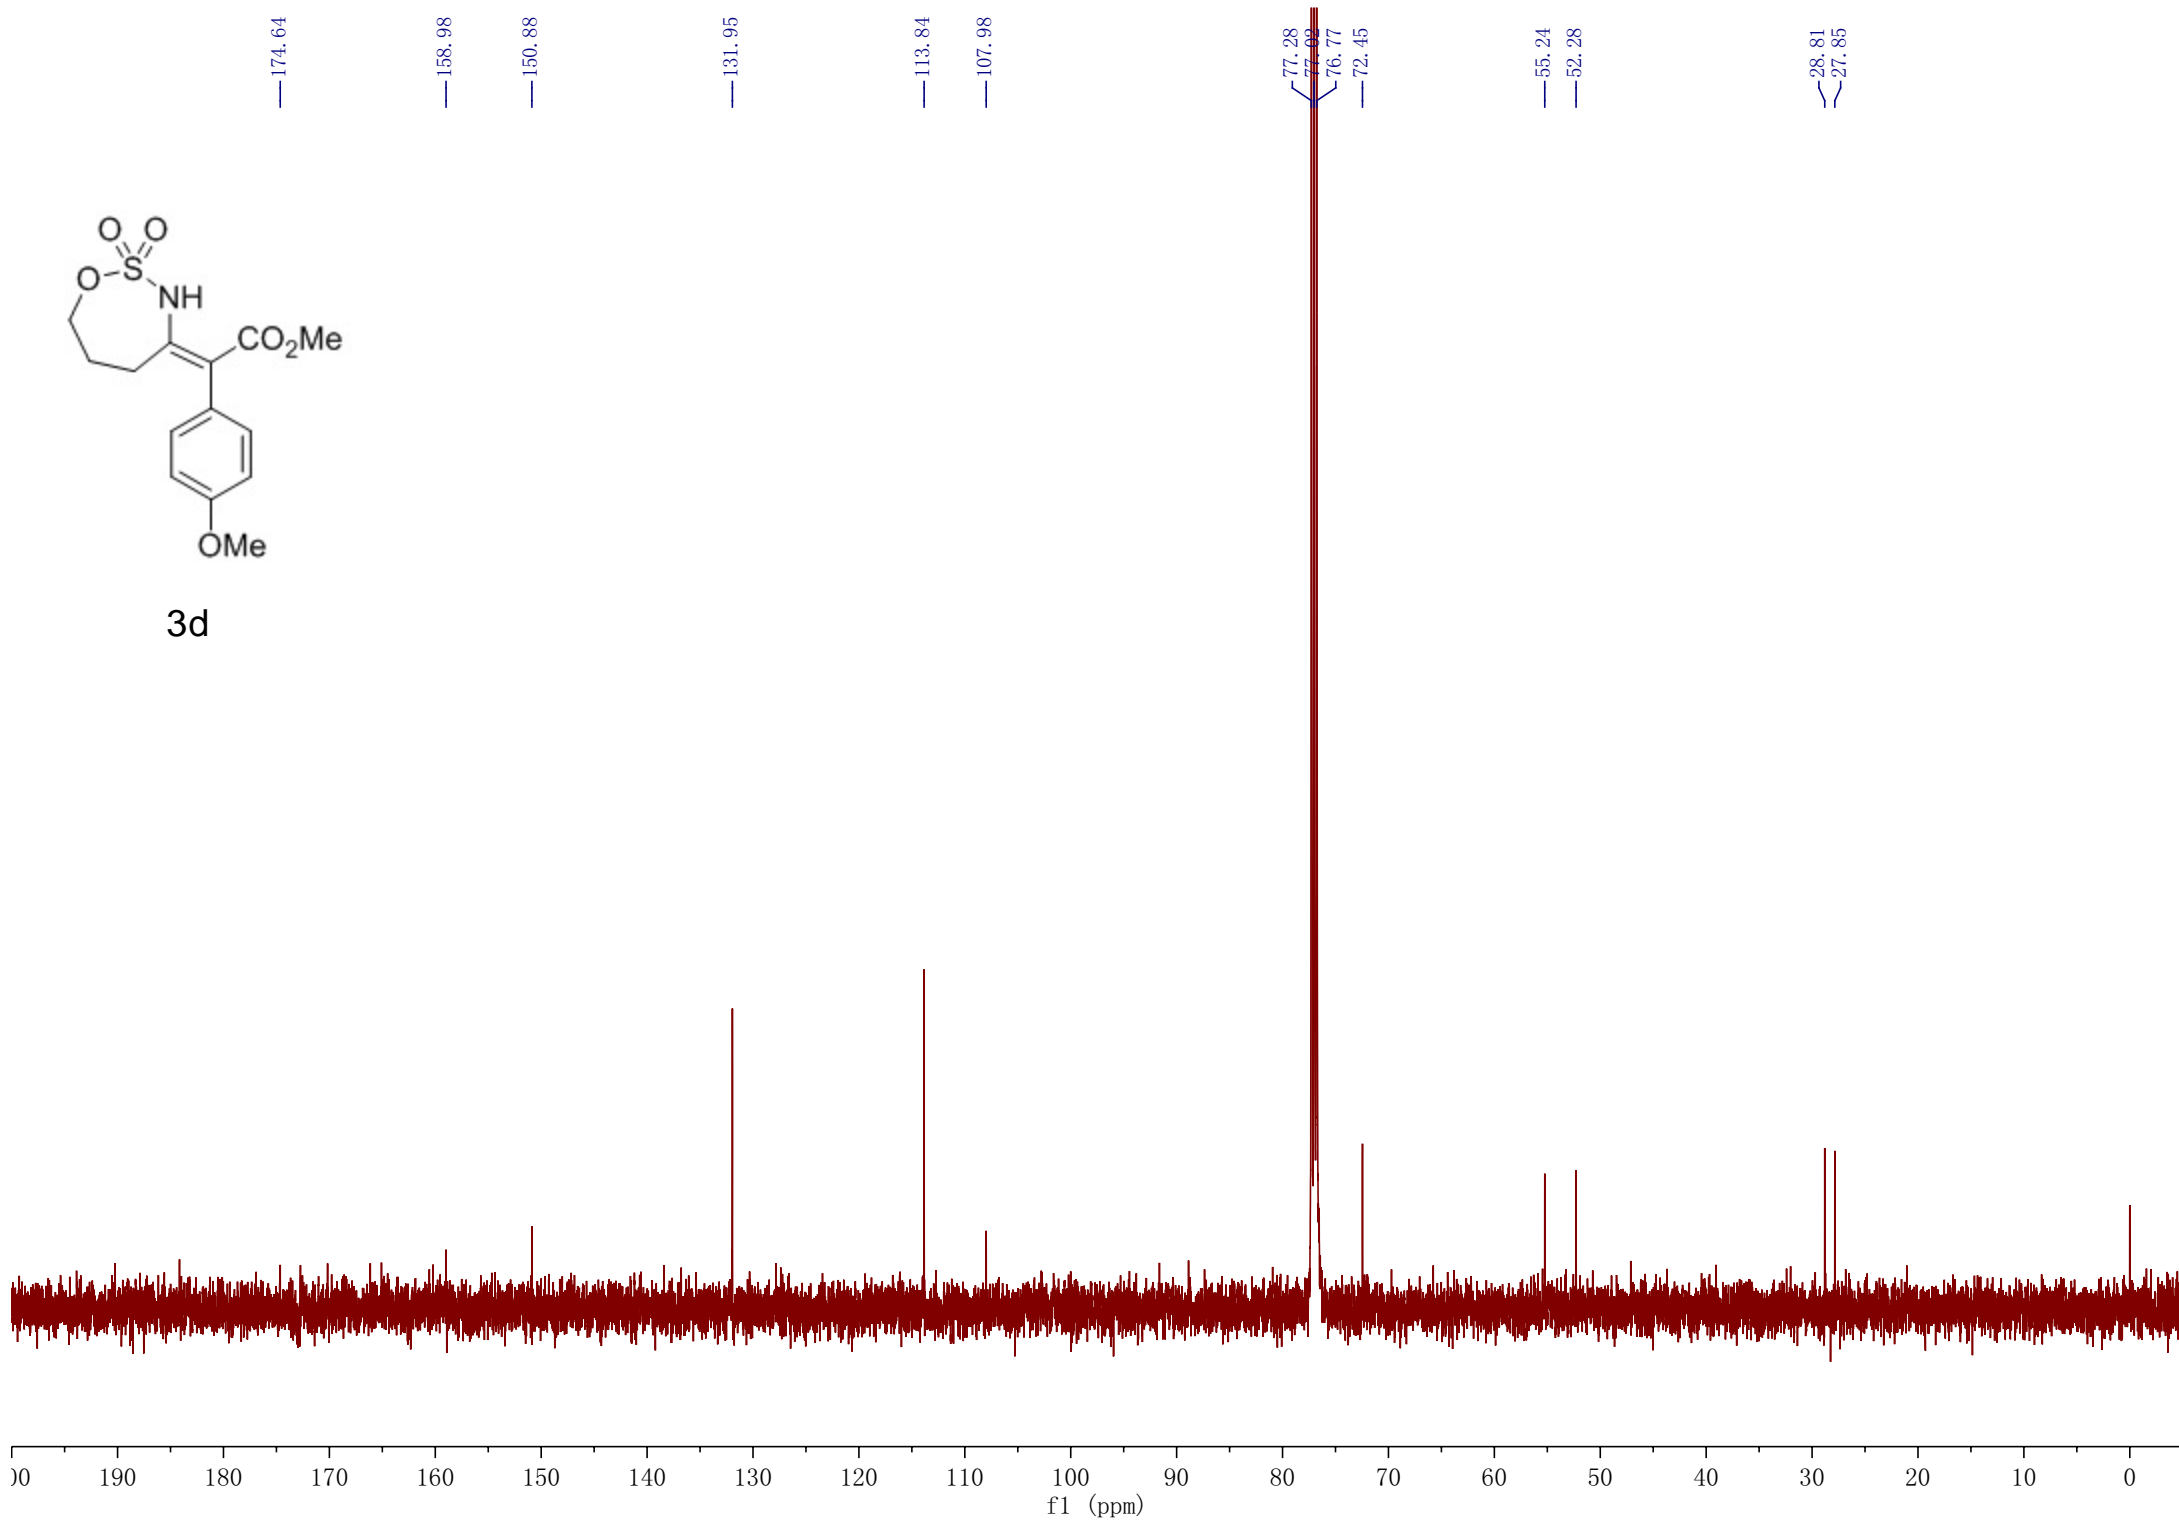

—12.05

7.26  
7.10  
7.08  
7.07  
7.05  
7.03

4.46  
4.45  
4.43

—3.65

2.75  
2.73  
2.72

1.95  
1.93  
1.92  
1.91  
1.89  
1.59

—0.00

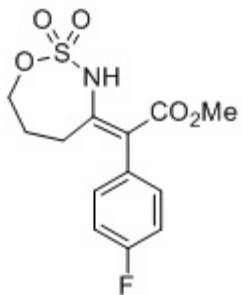

3e

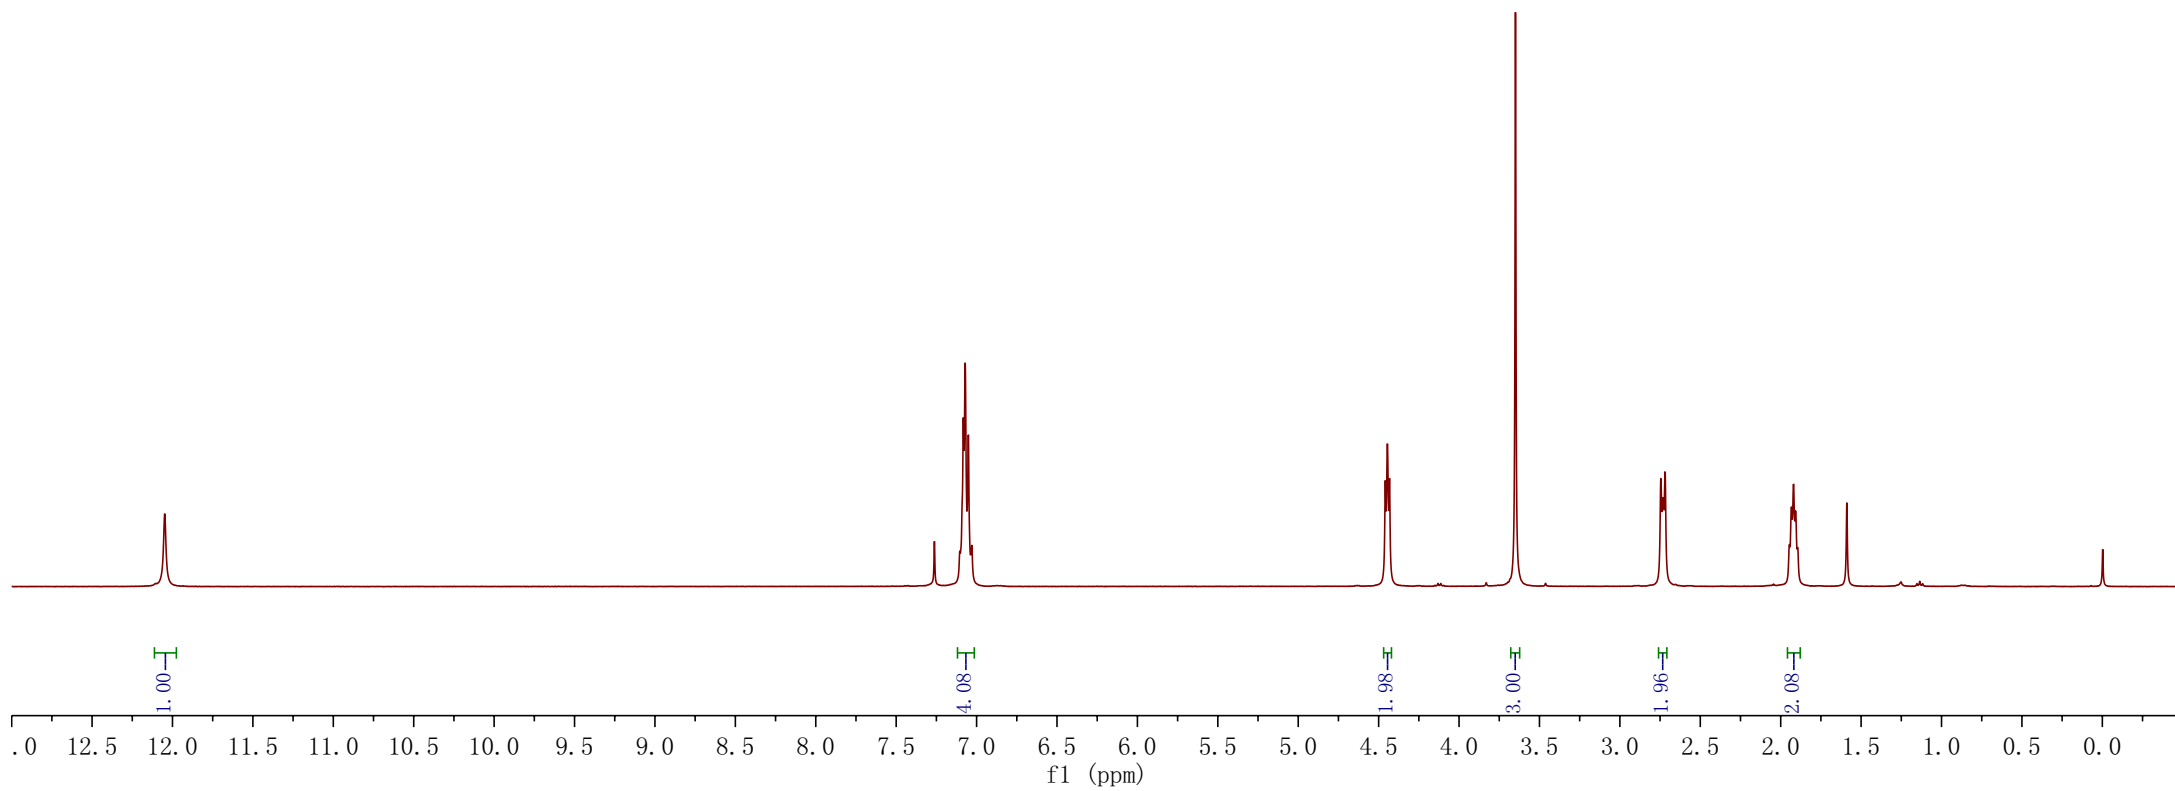

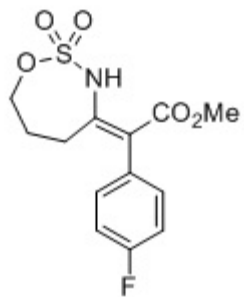

3e

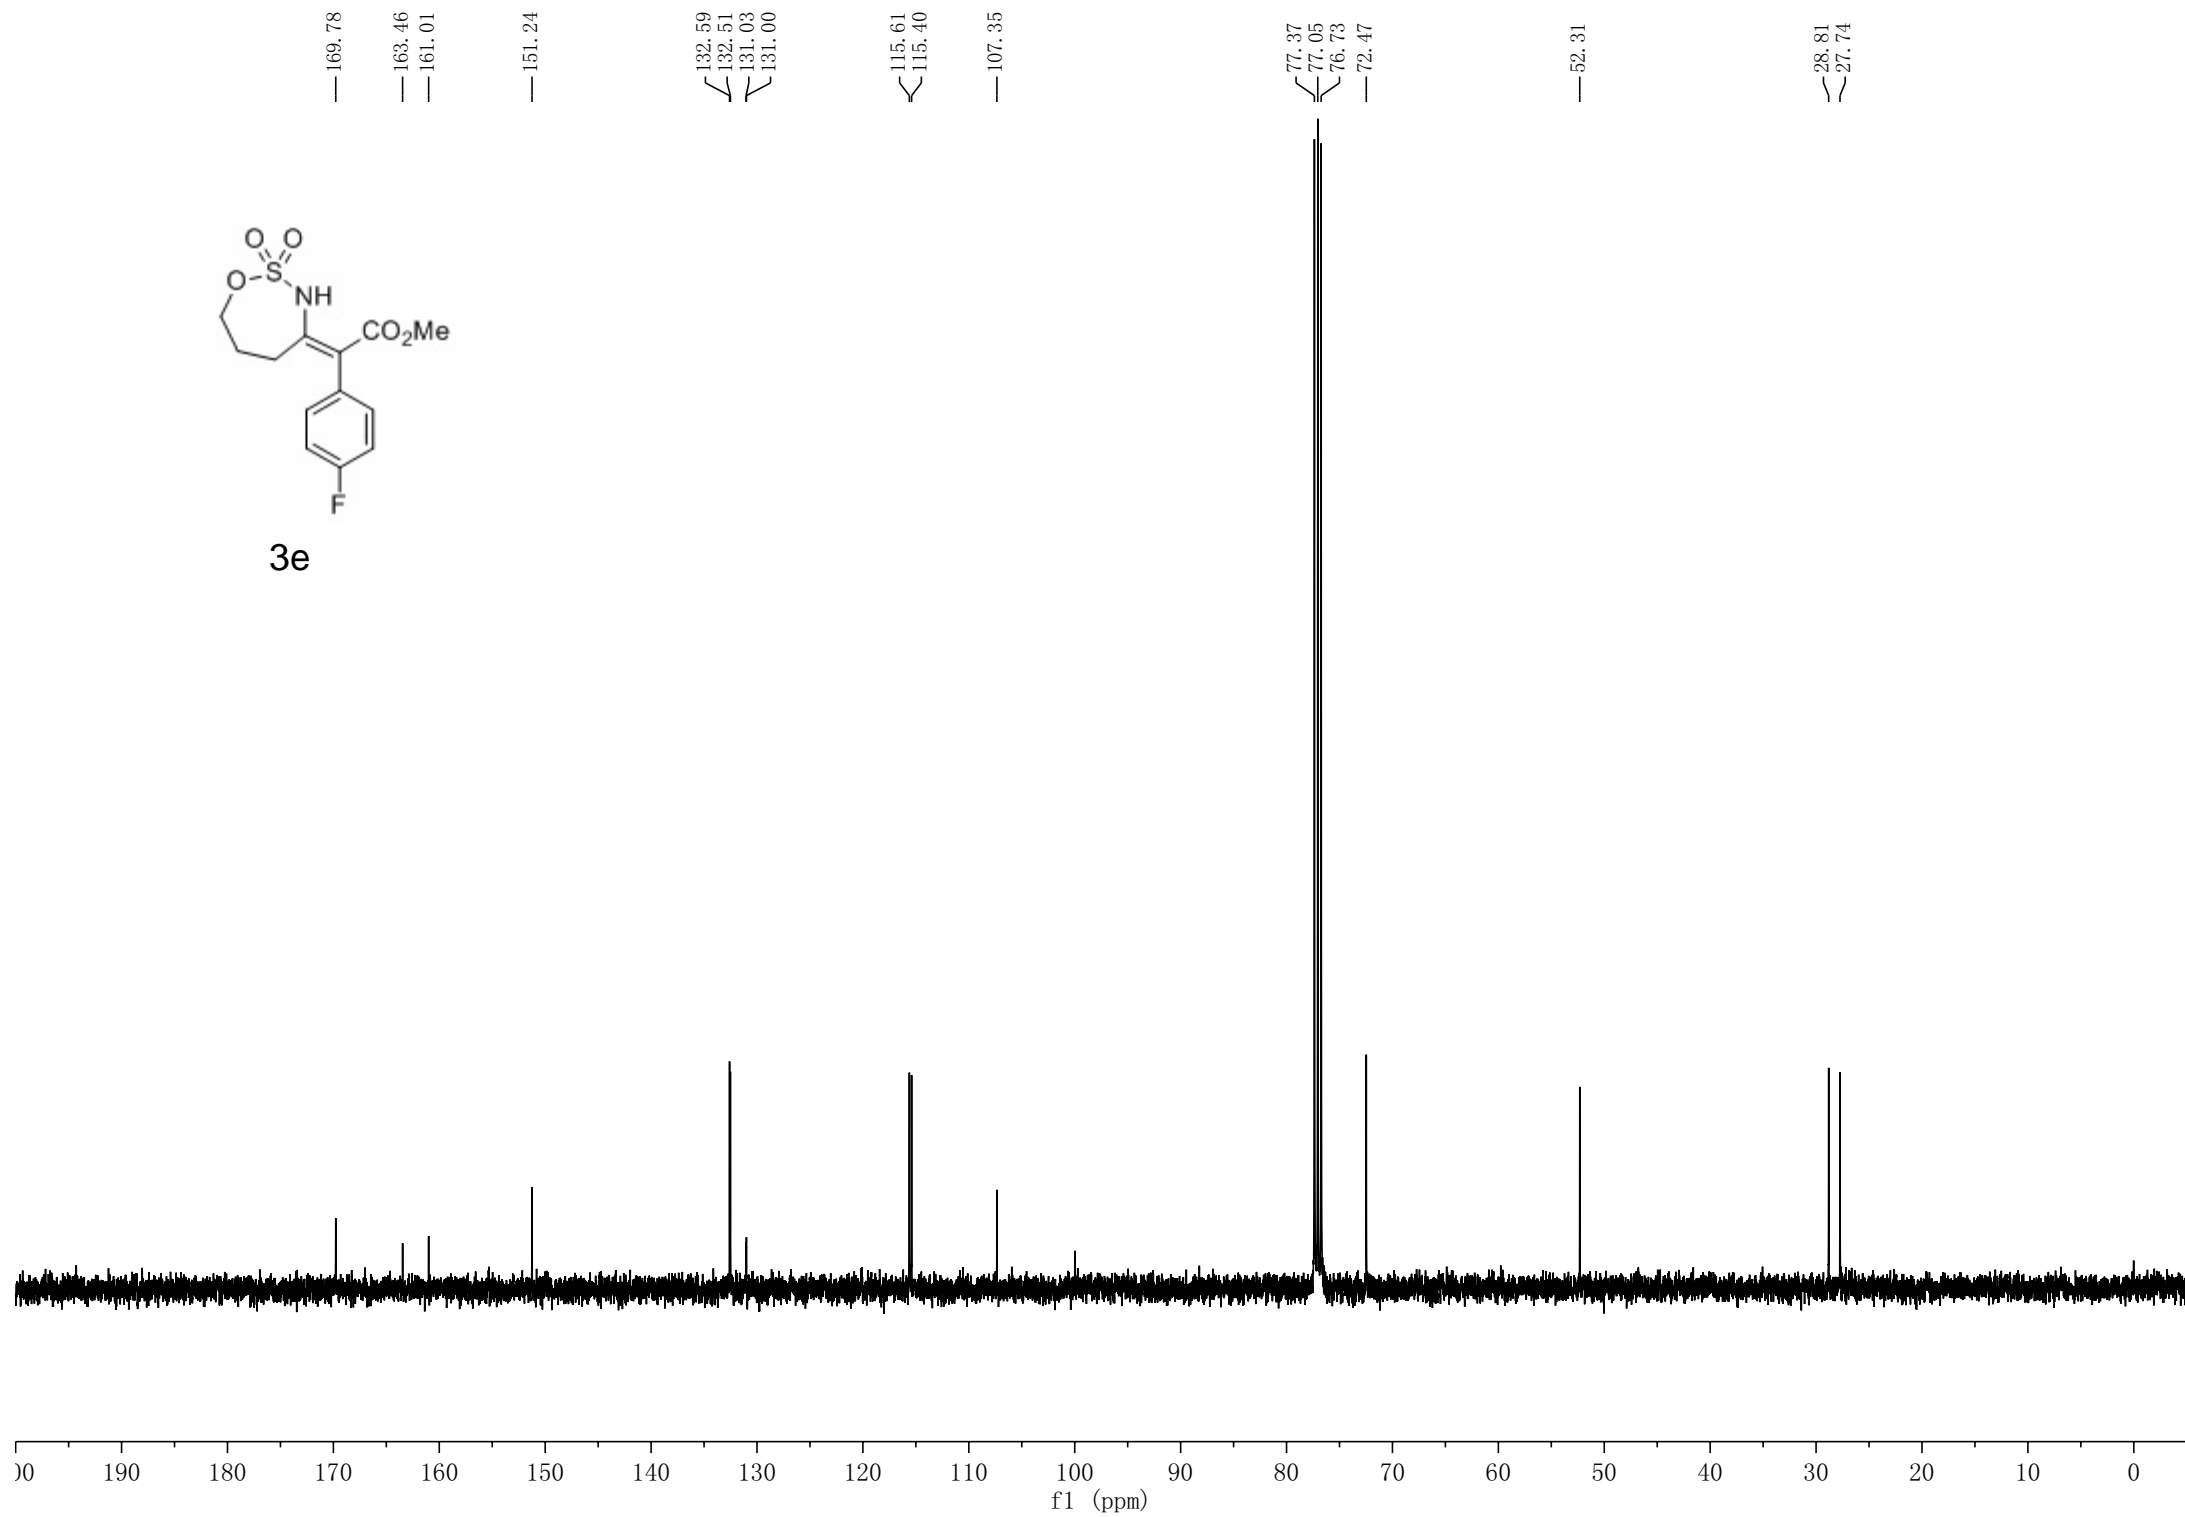

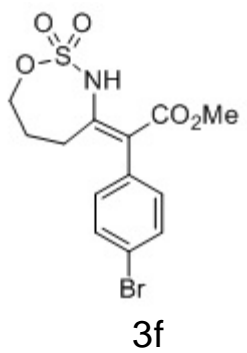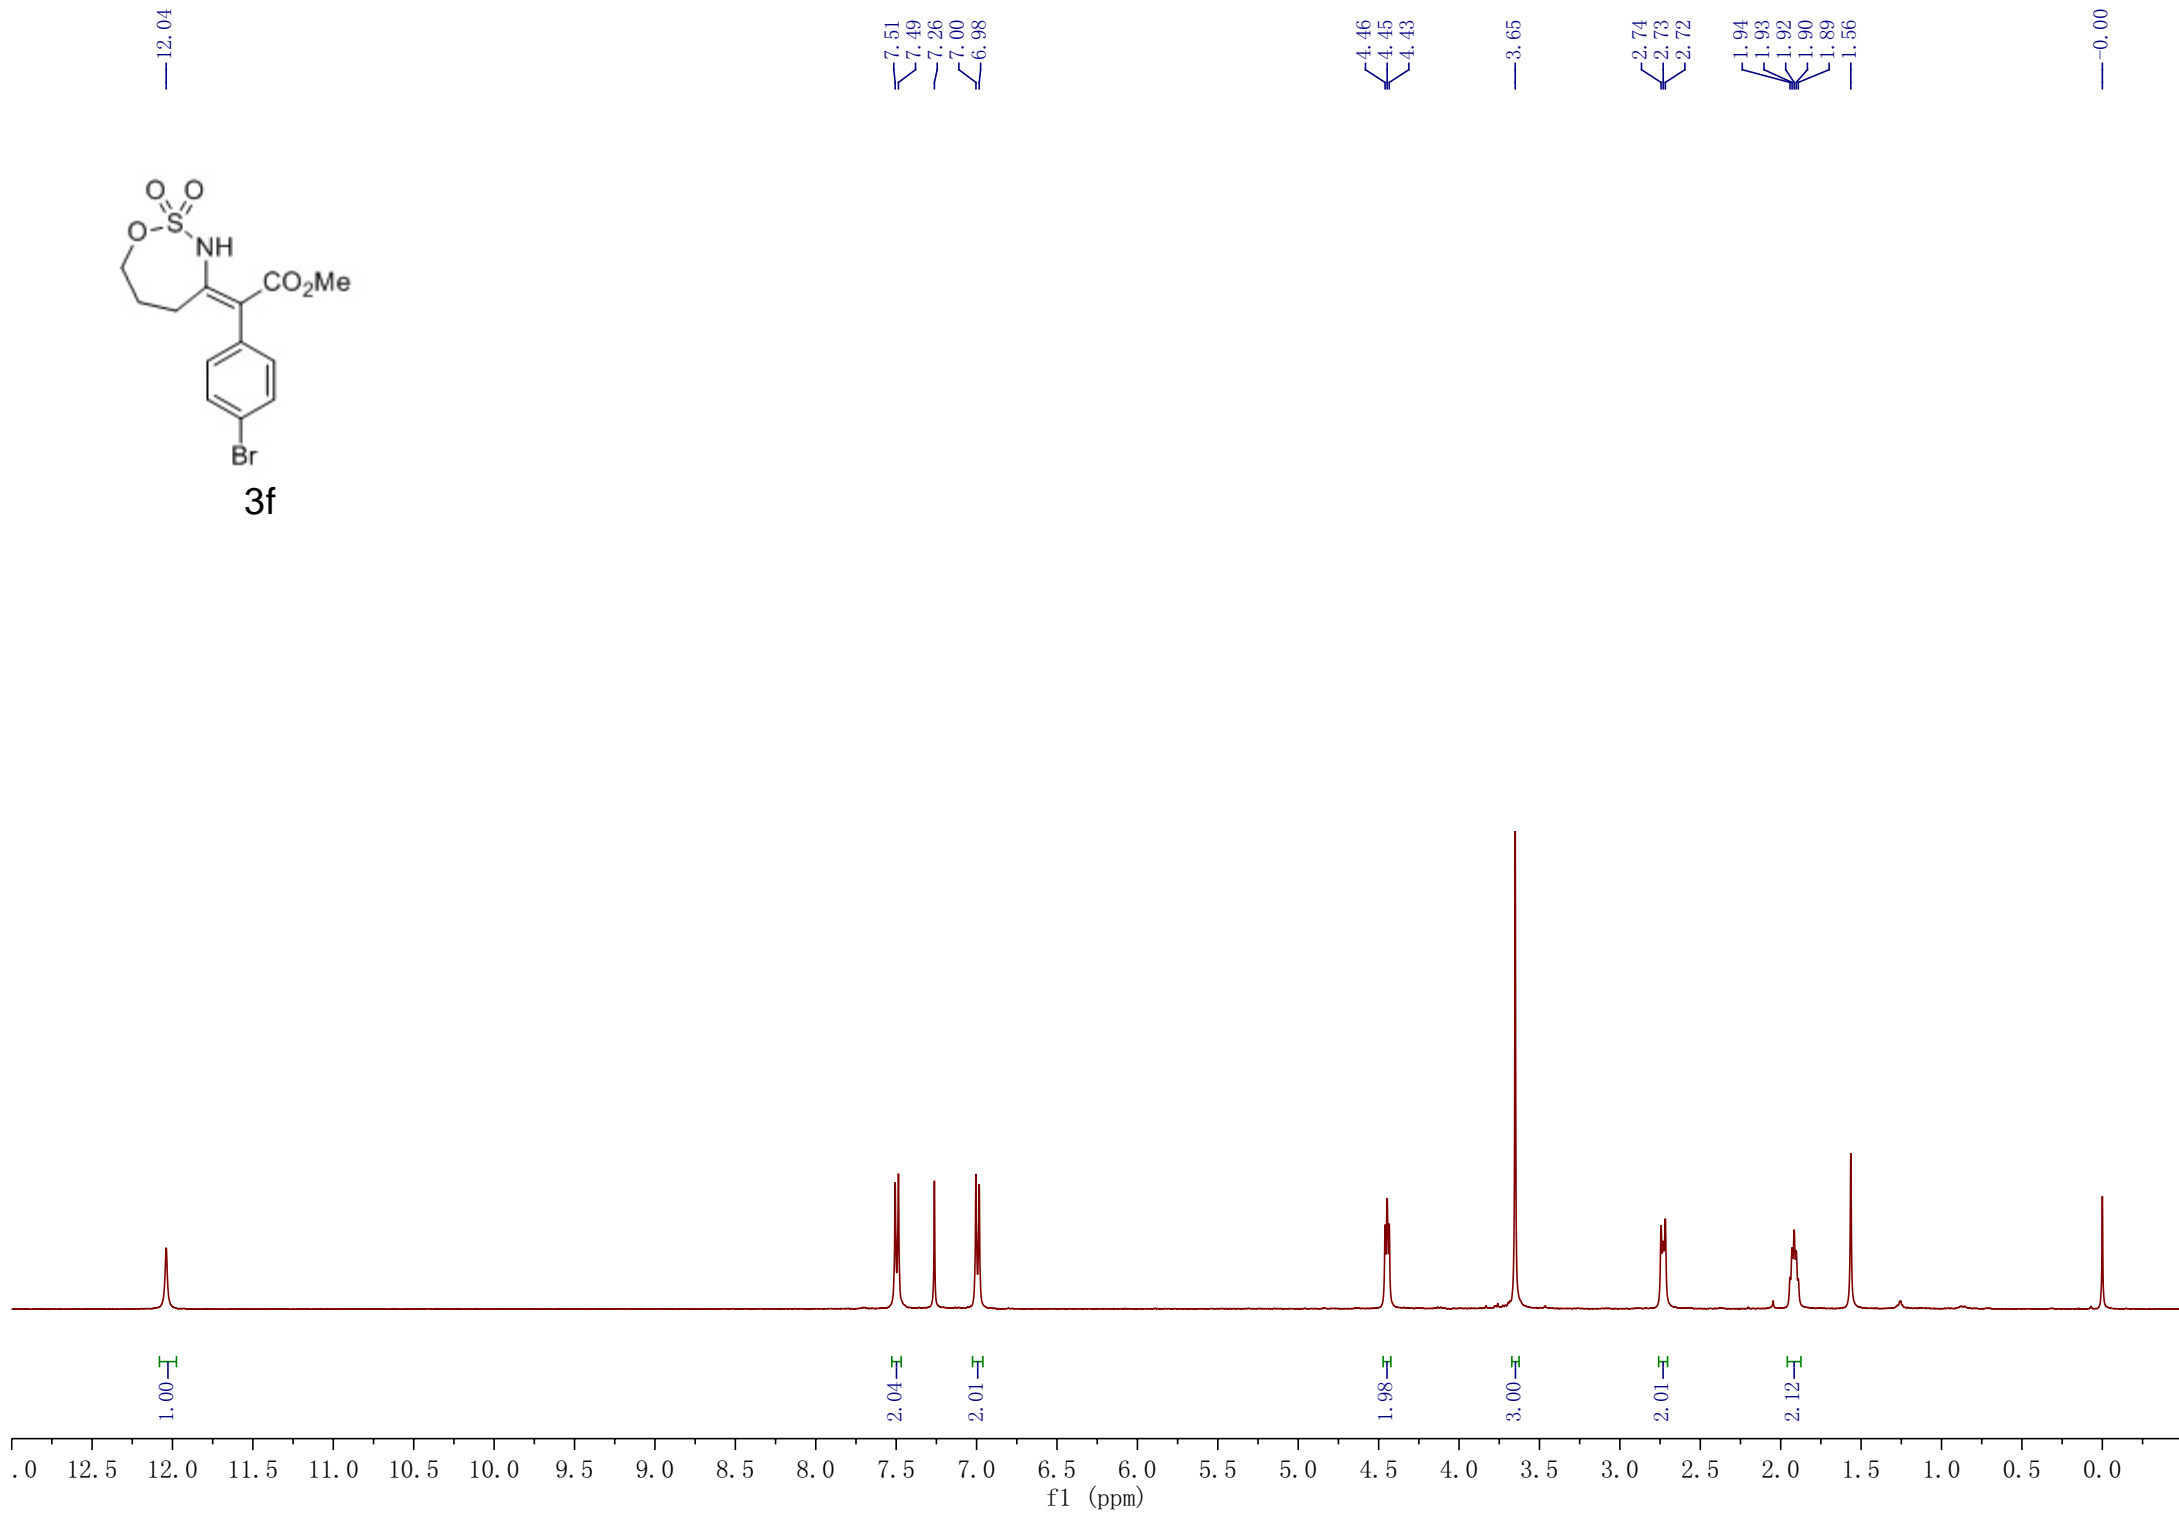

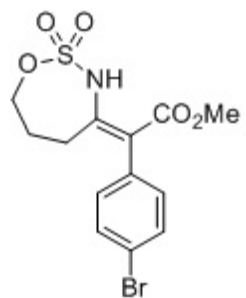

3f

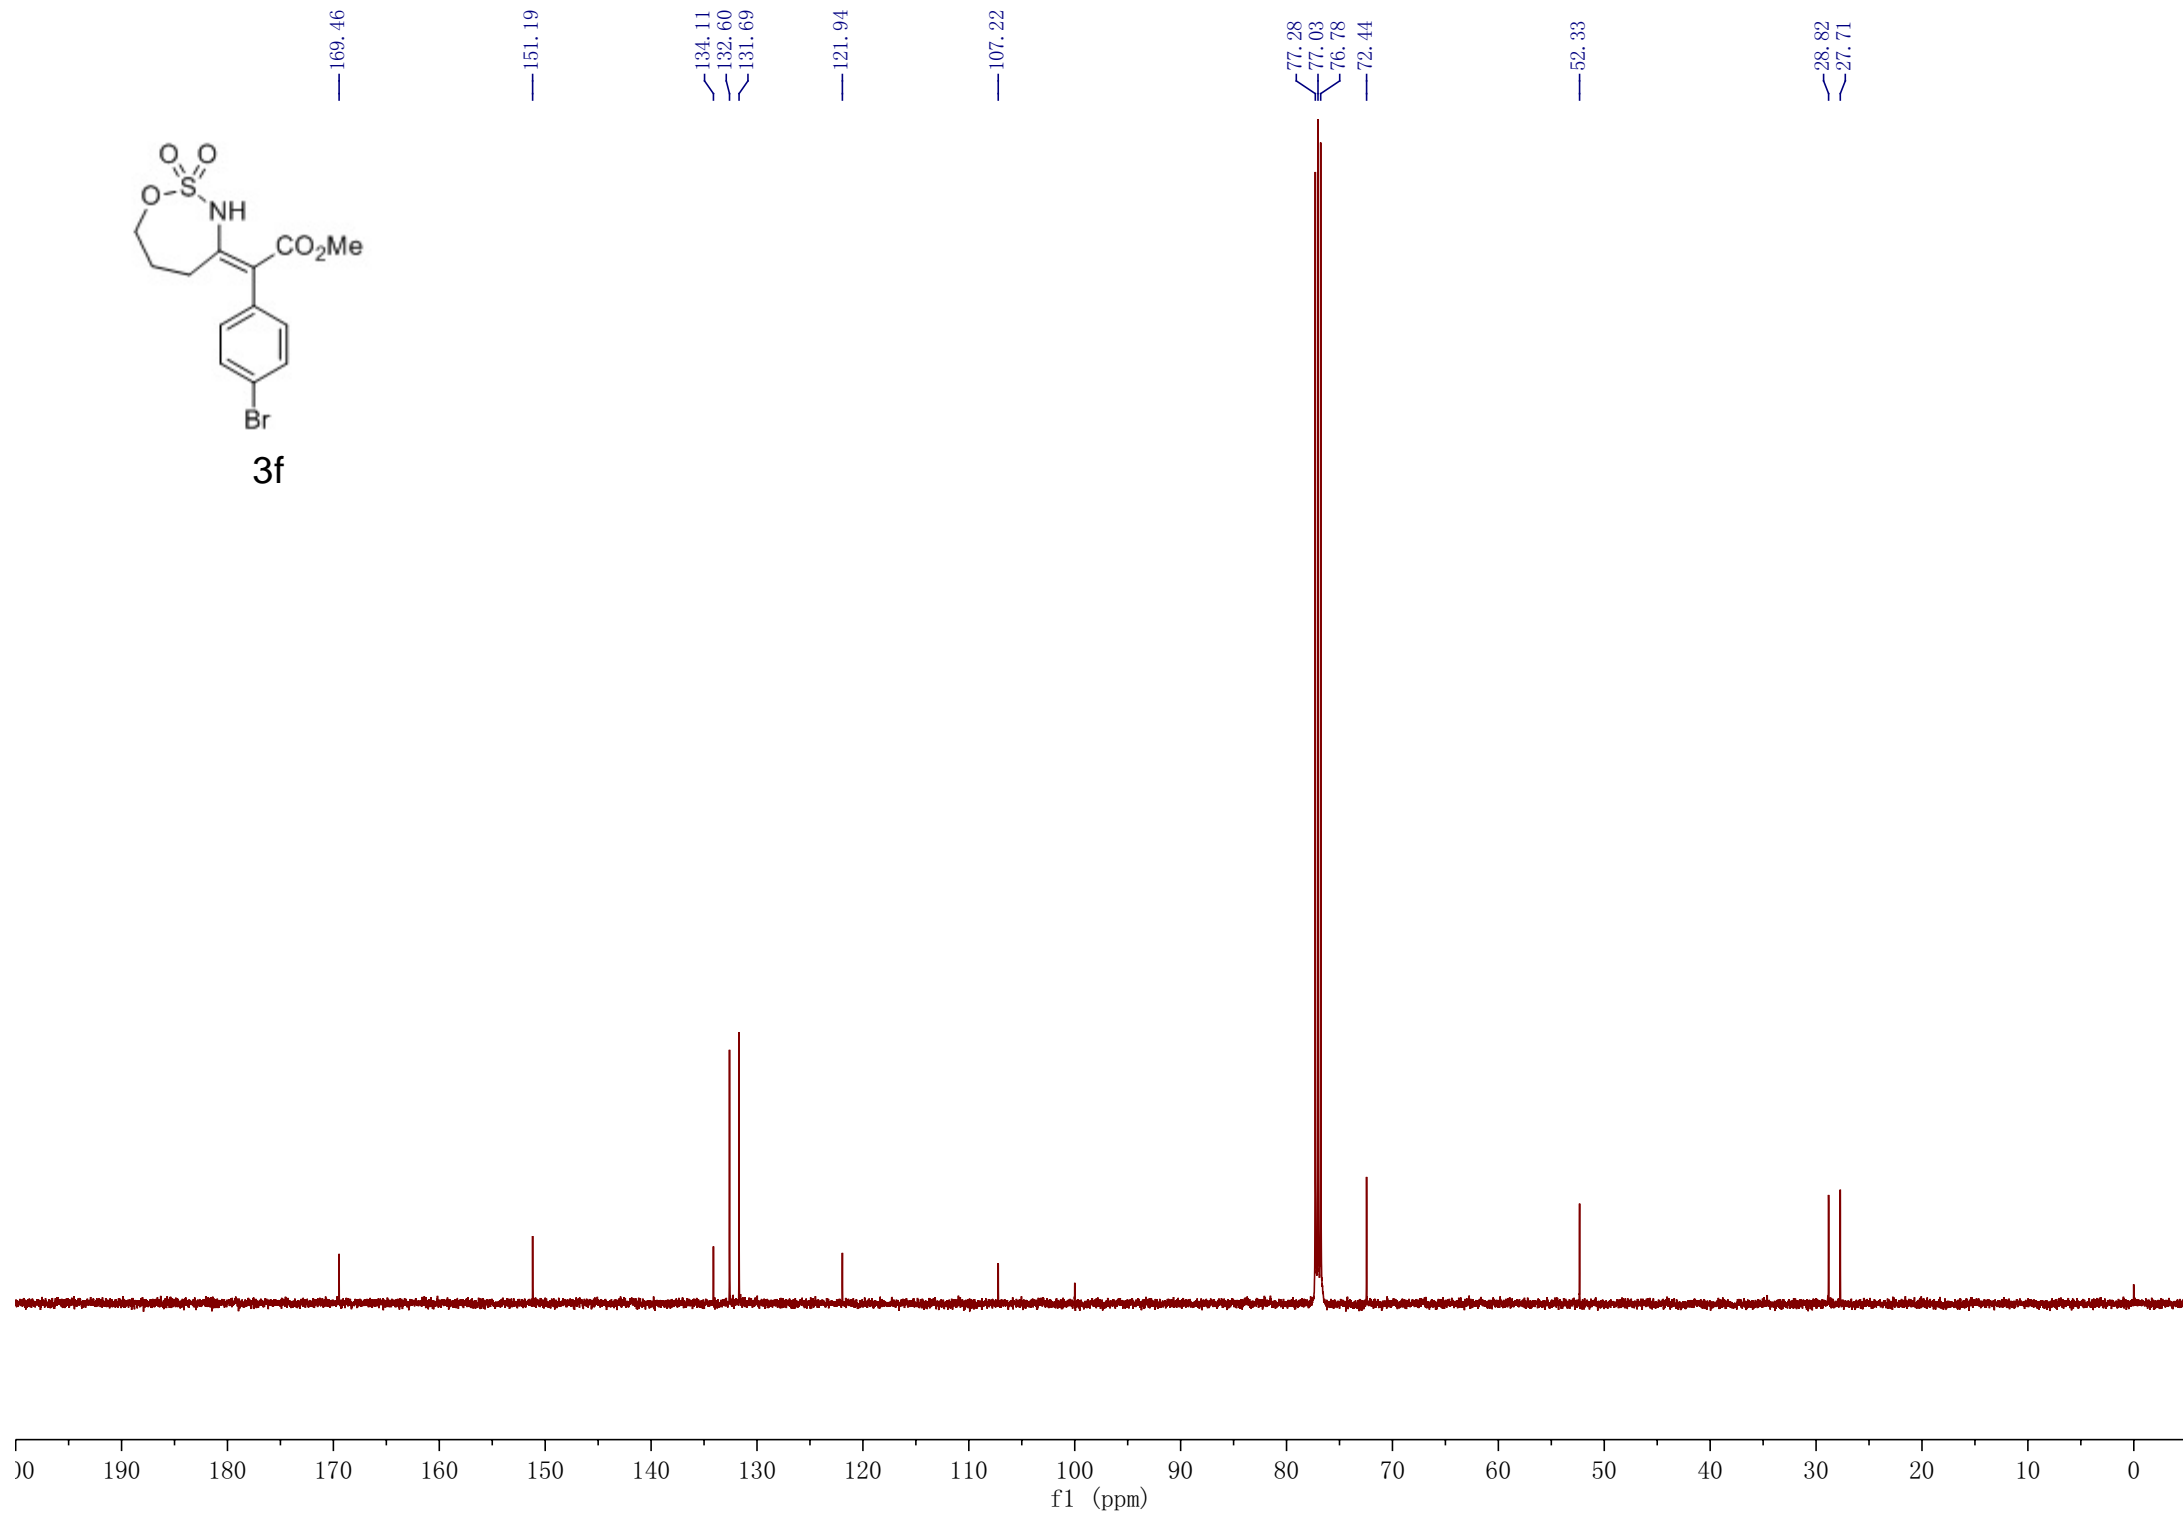

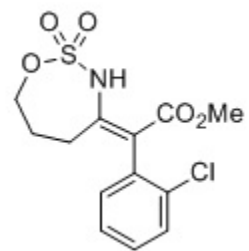

3g

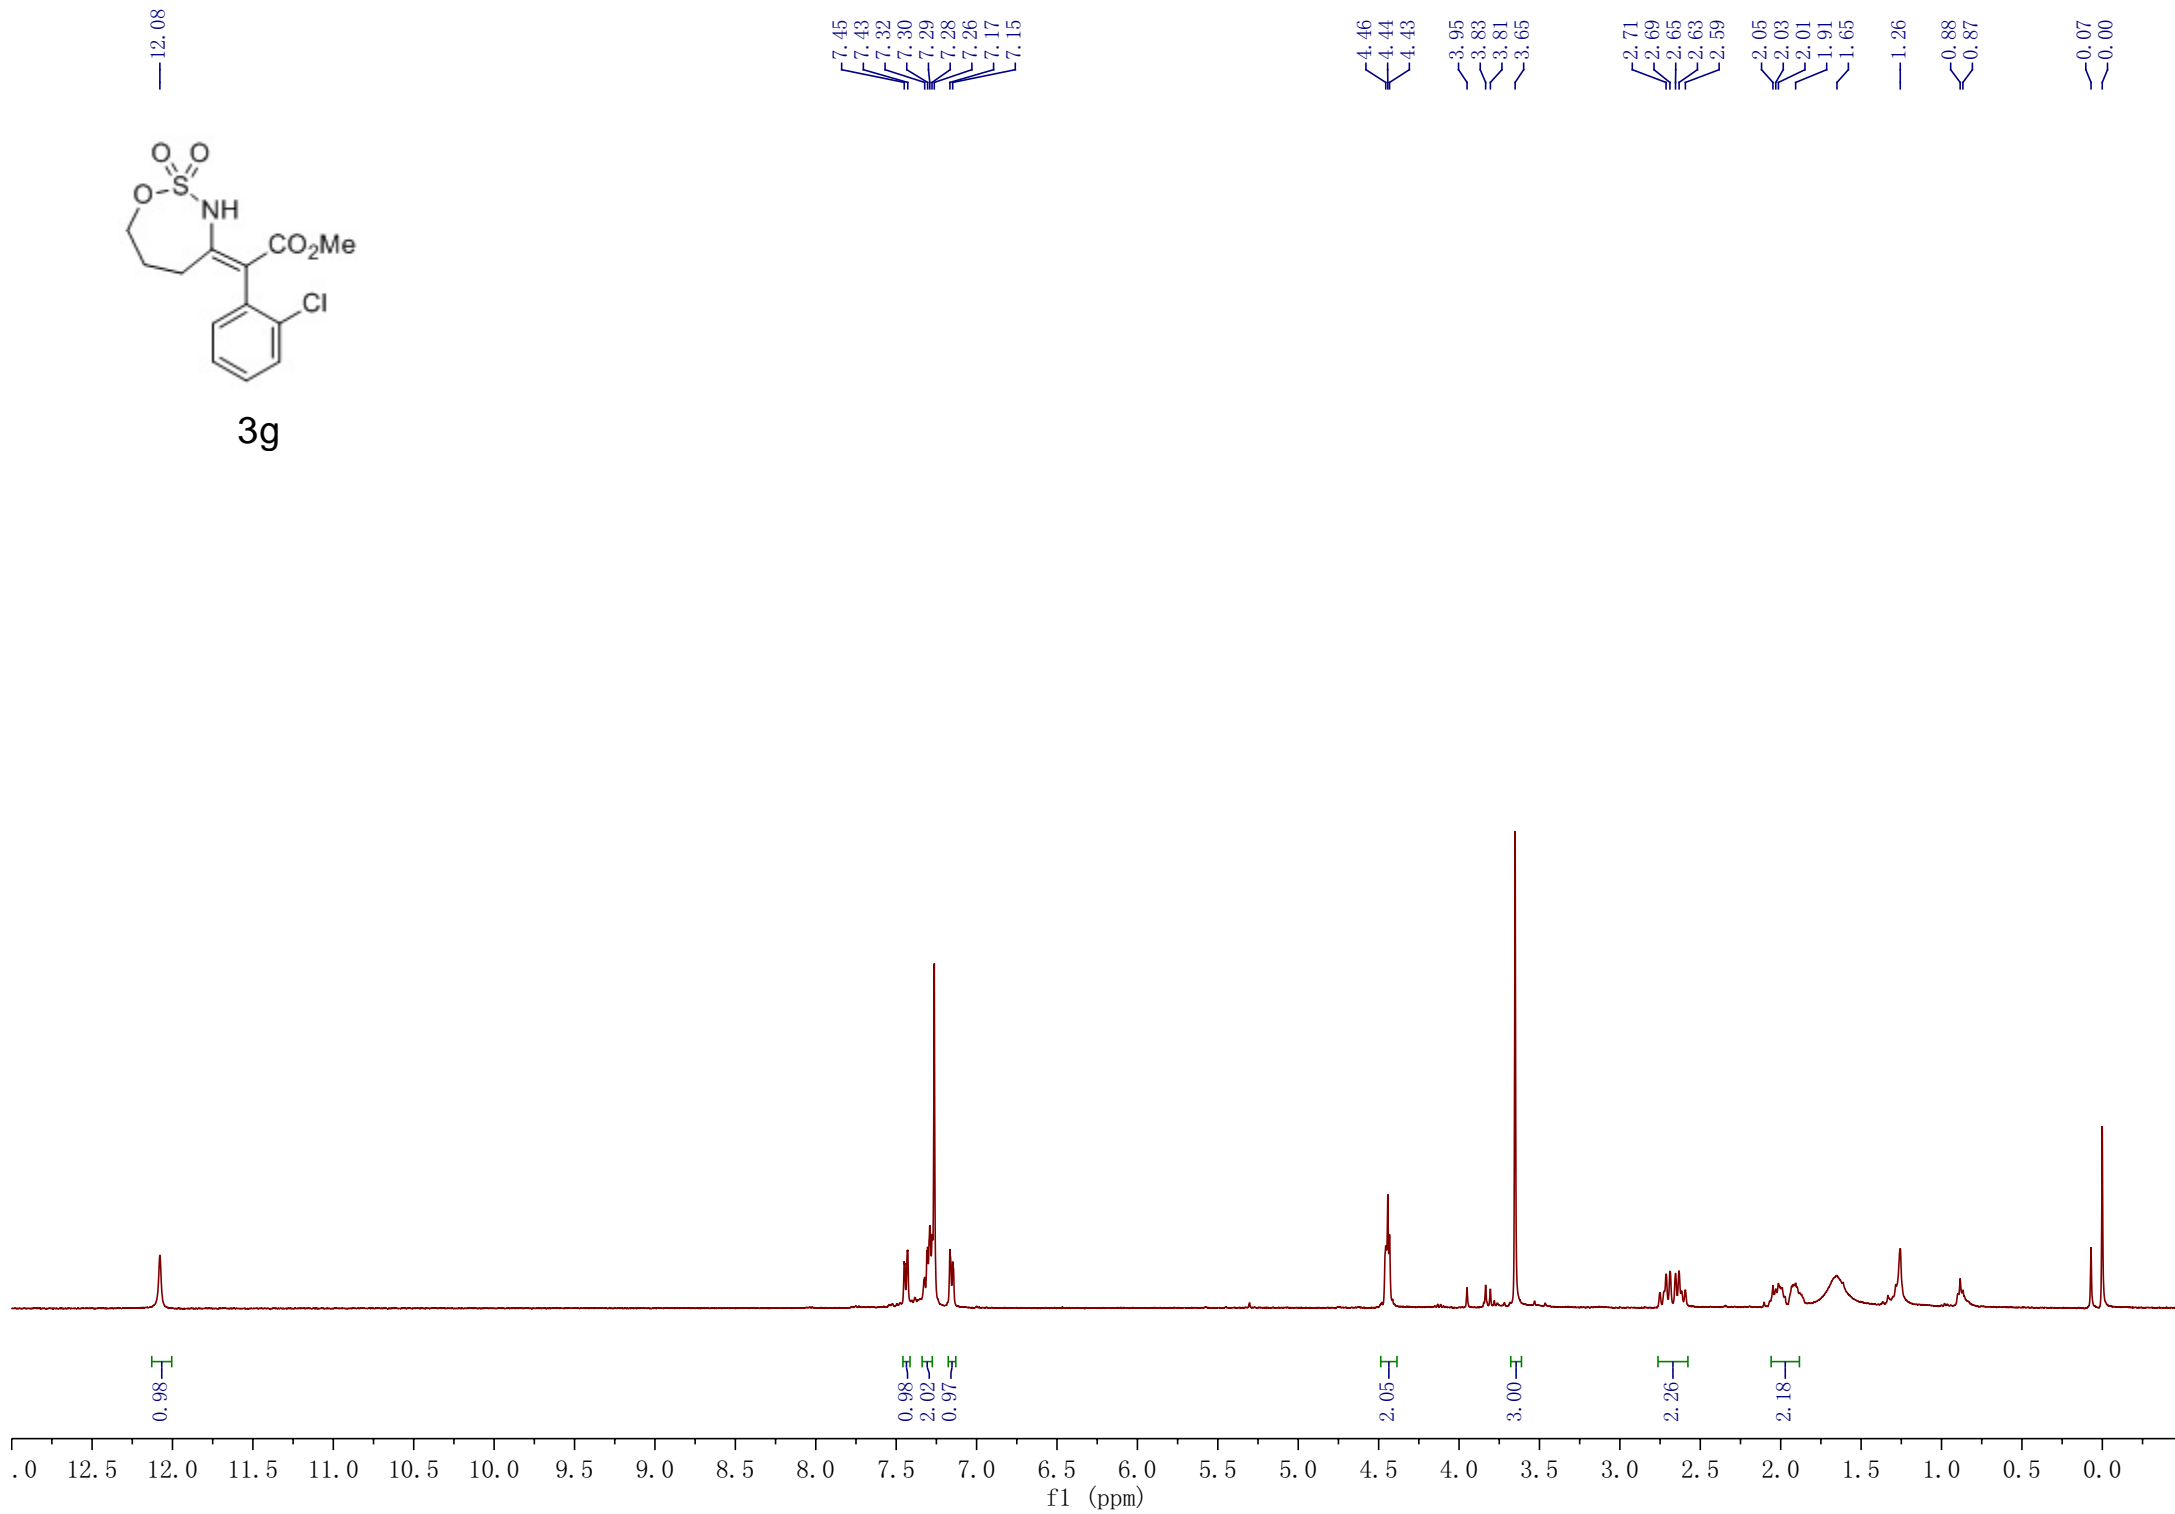



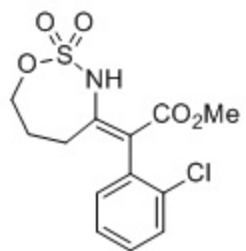

3g

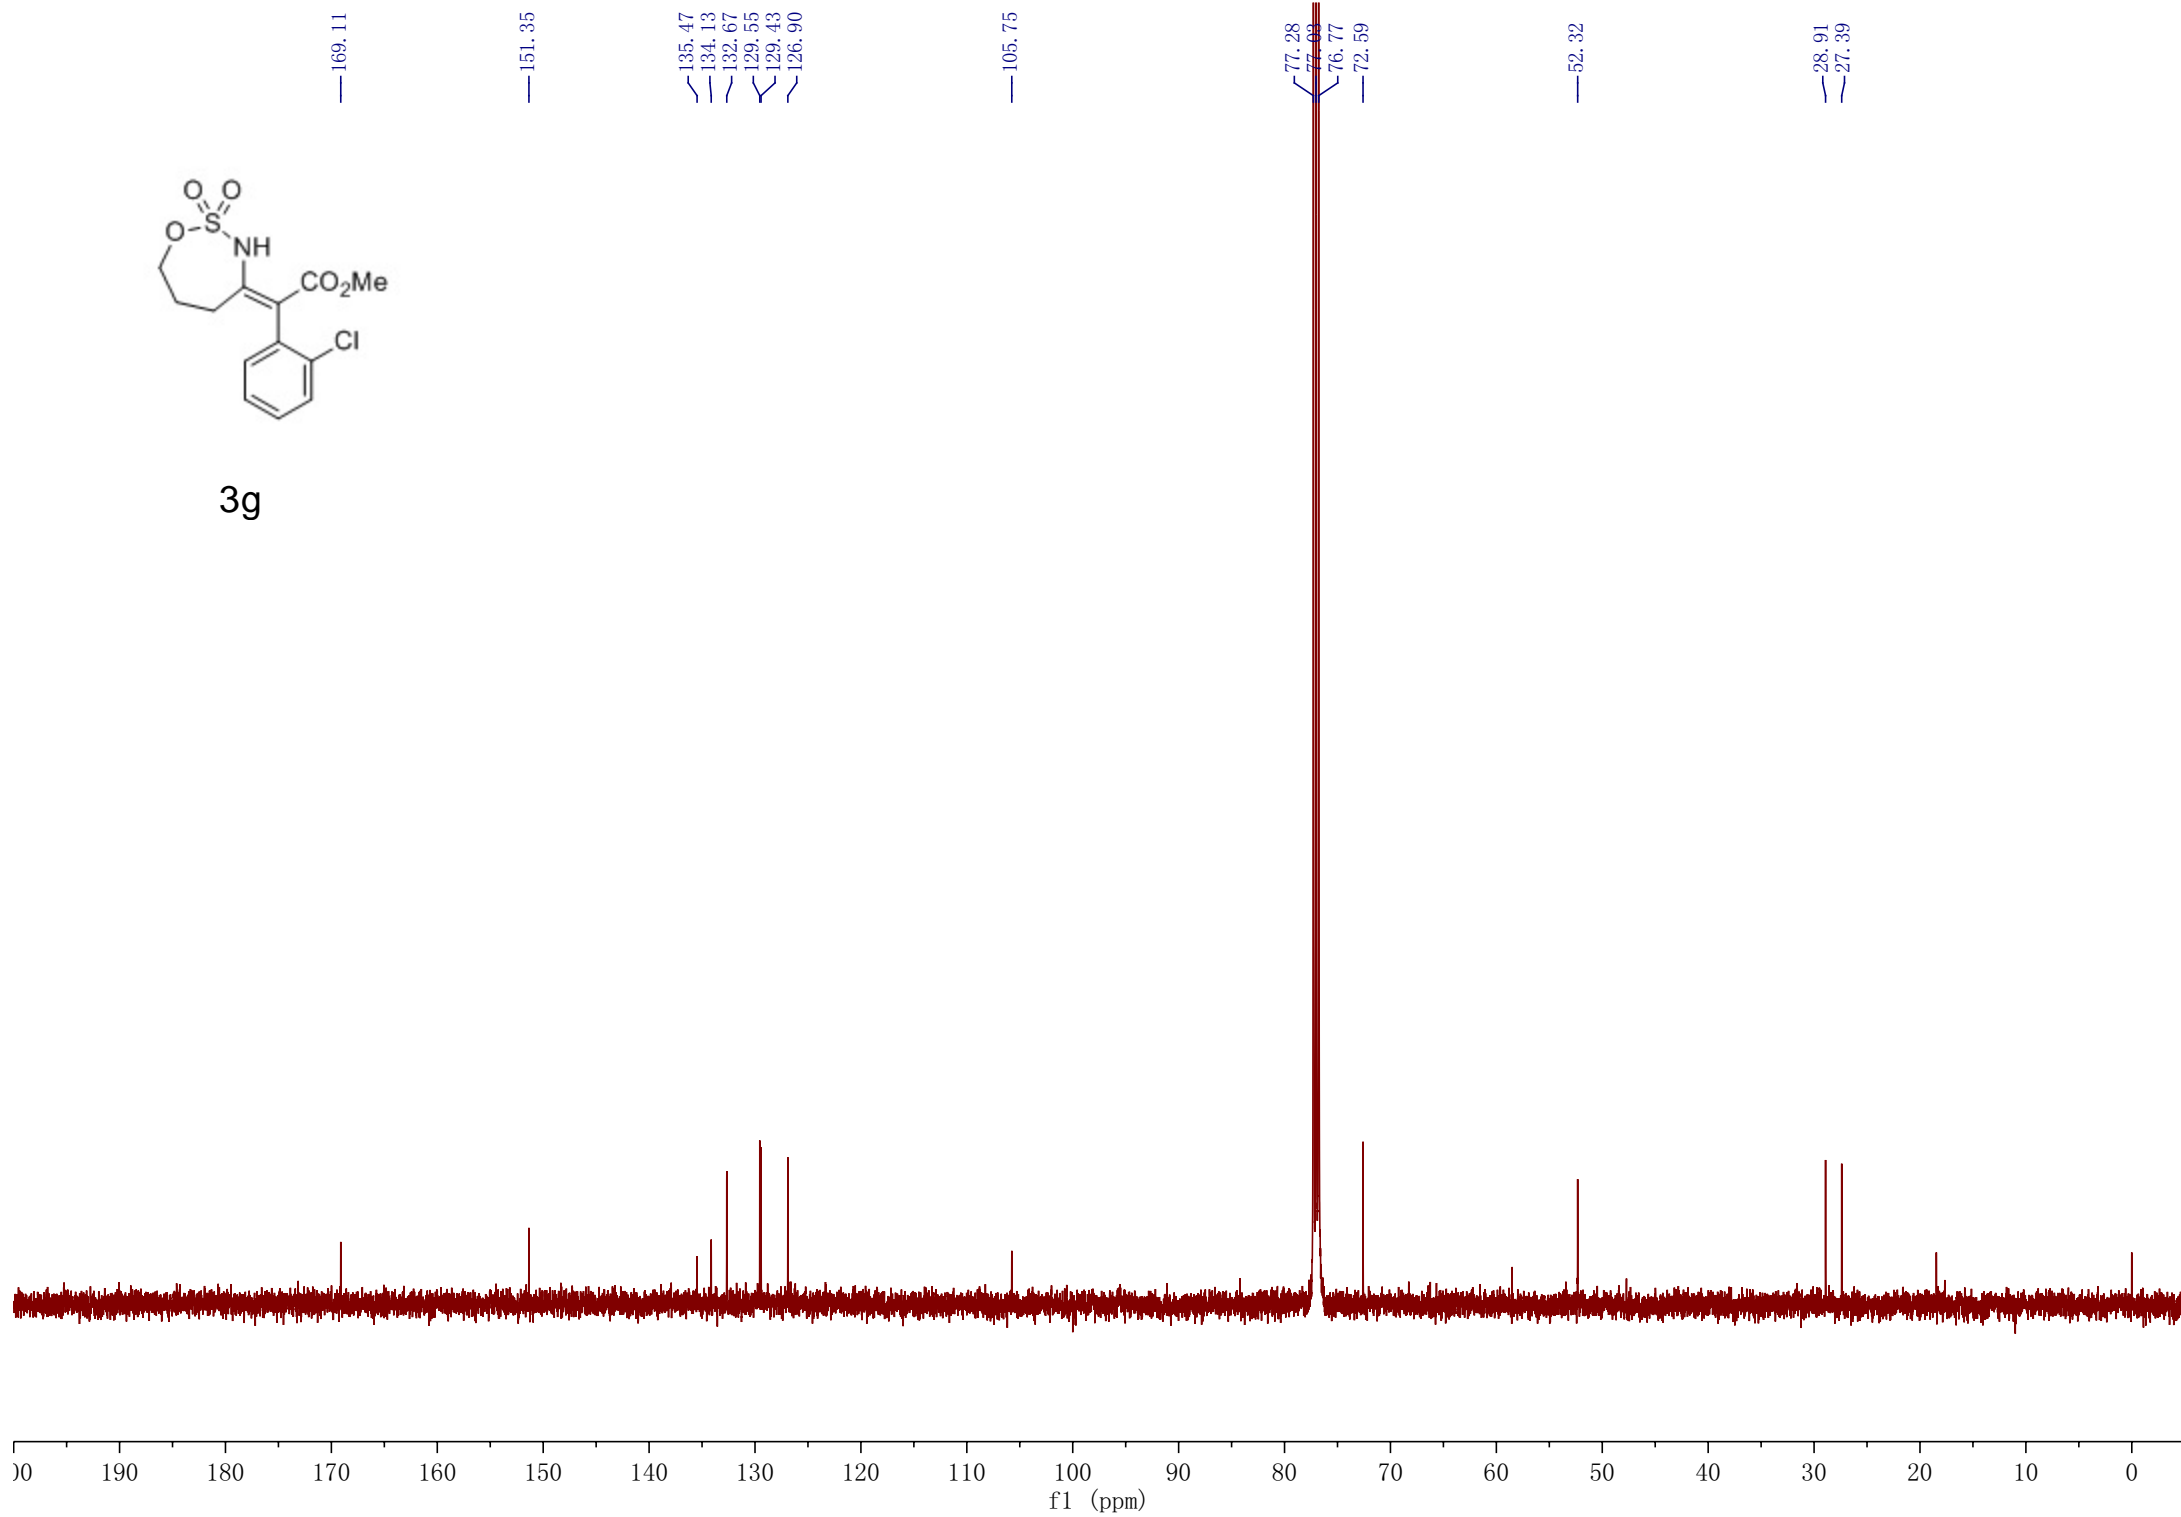

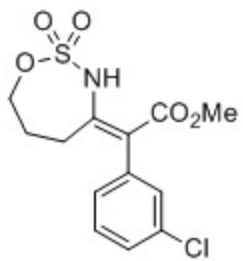

3h

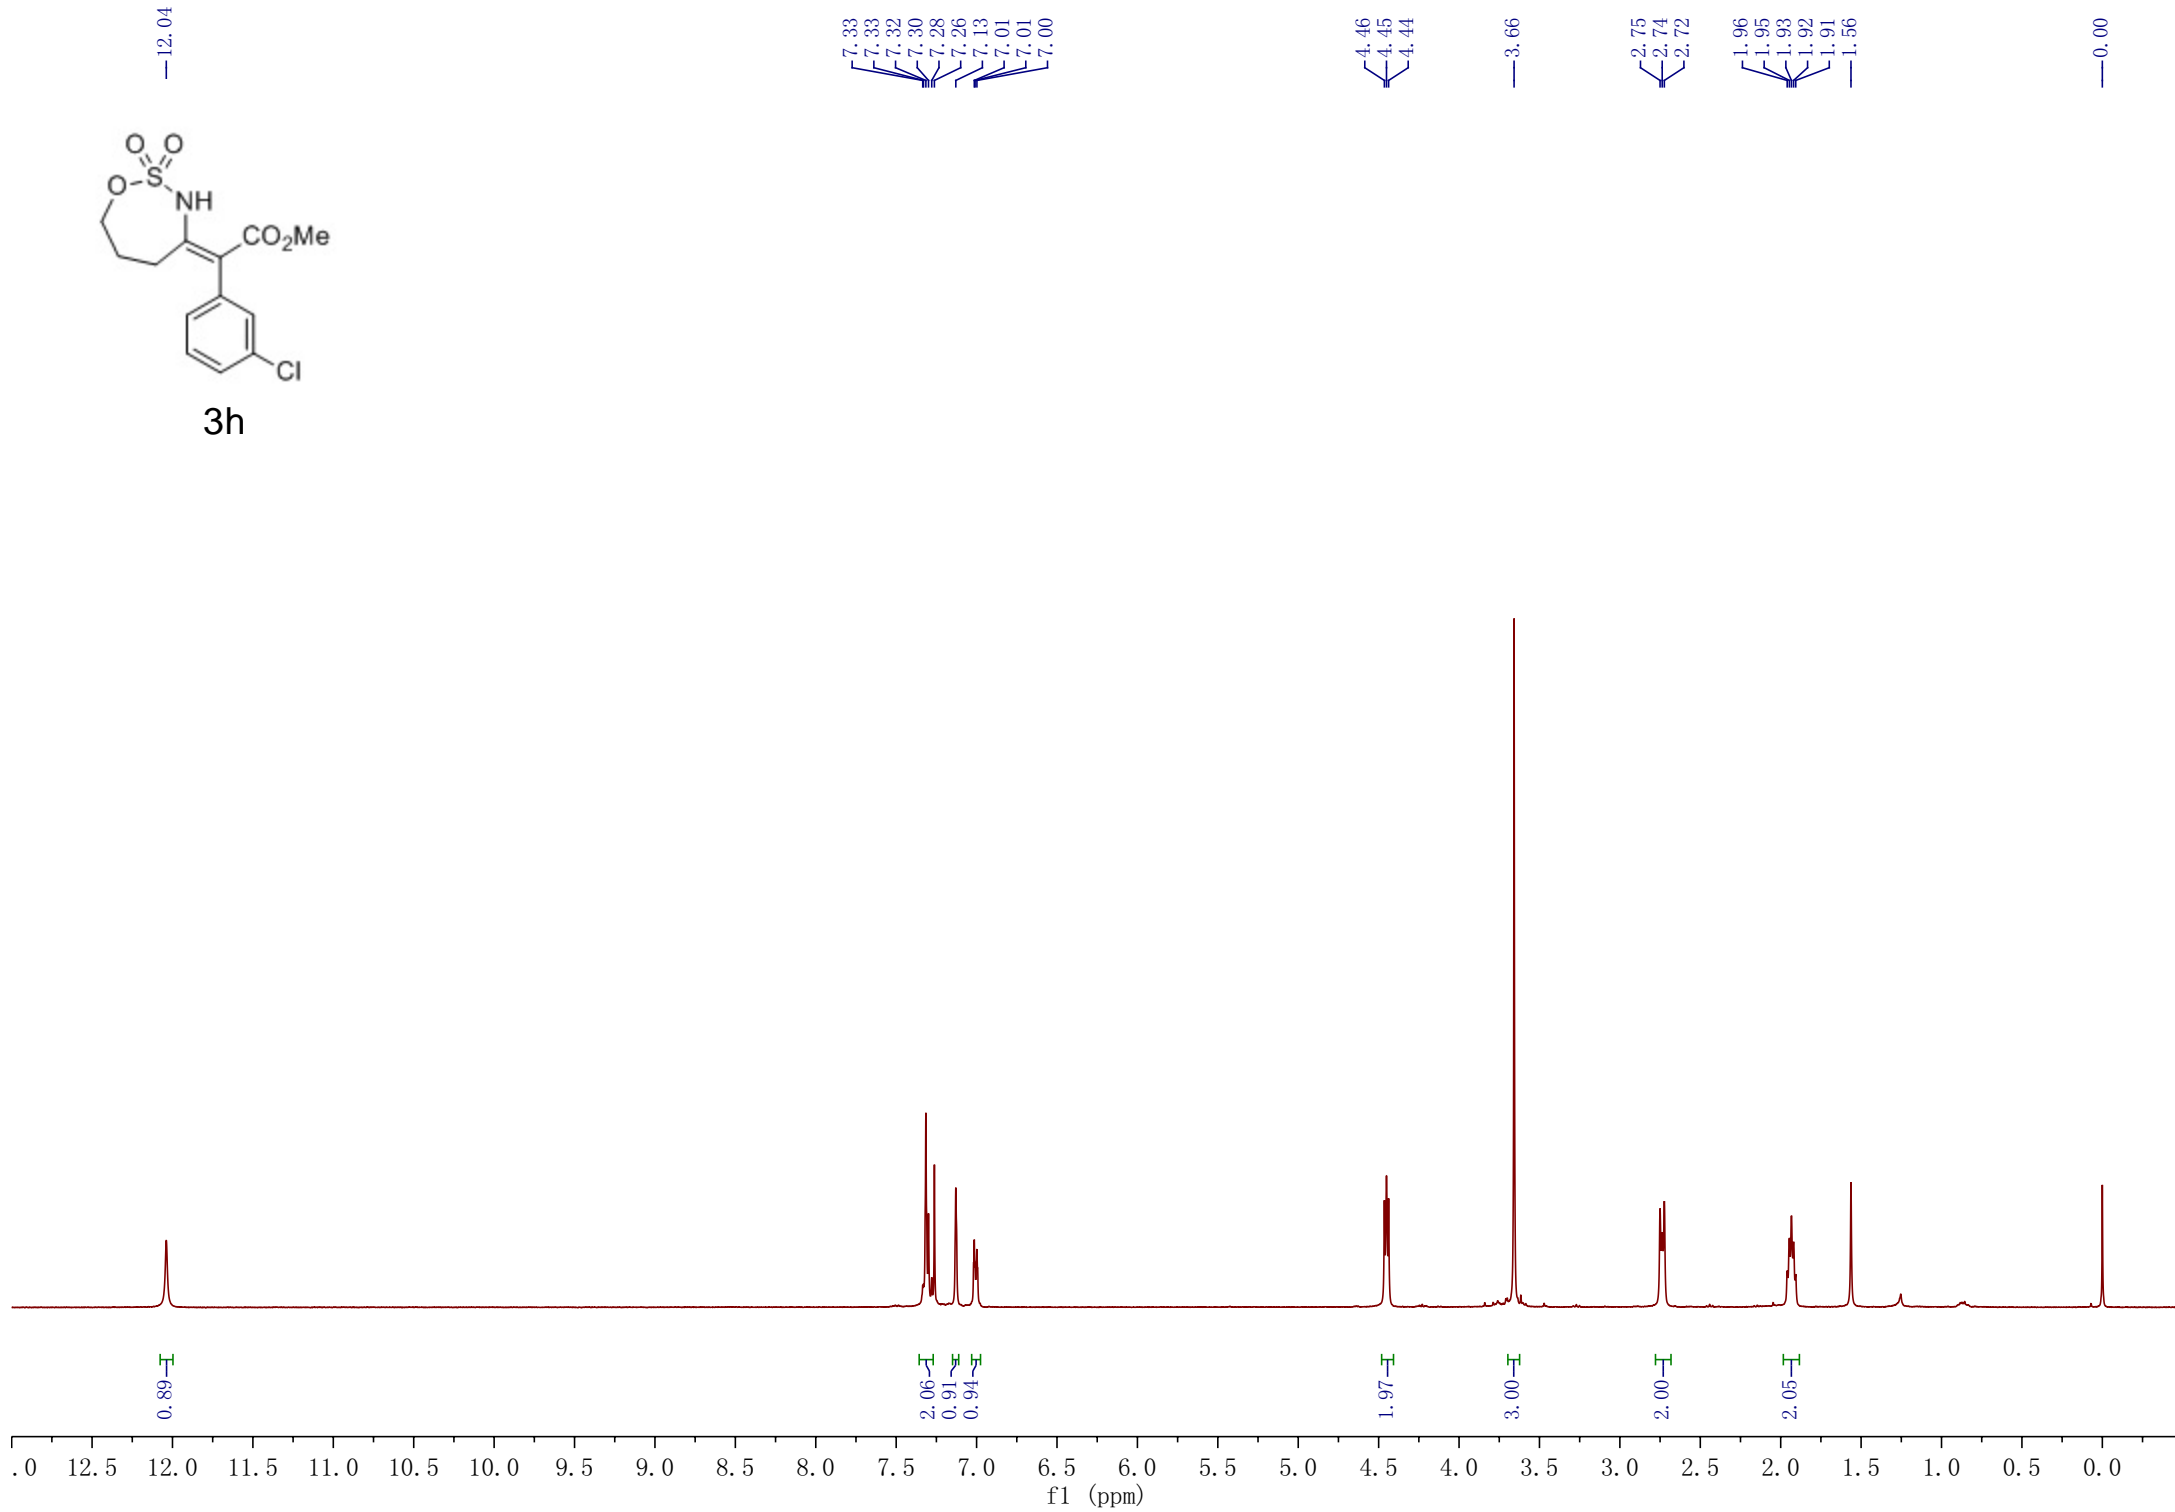

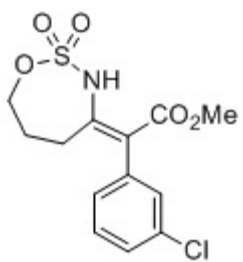

3h

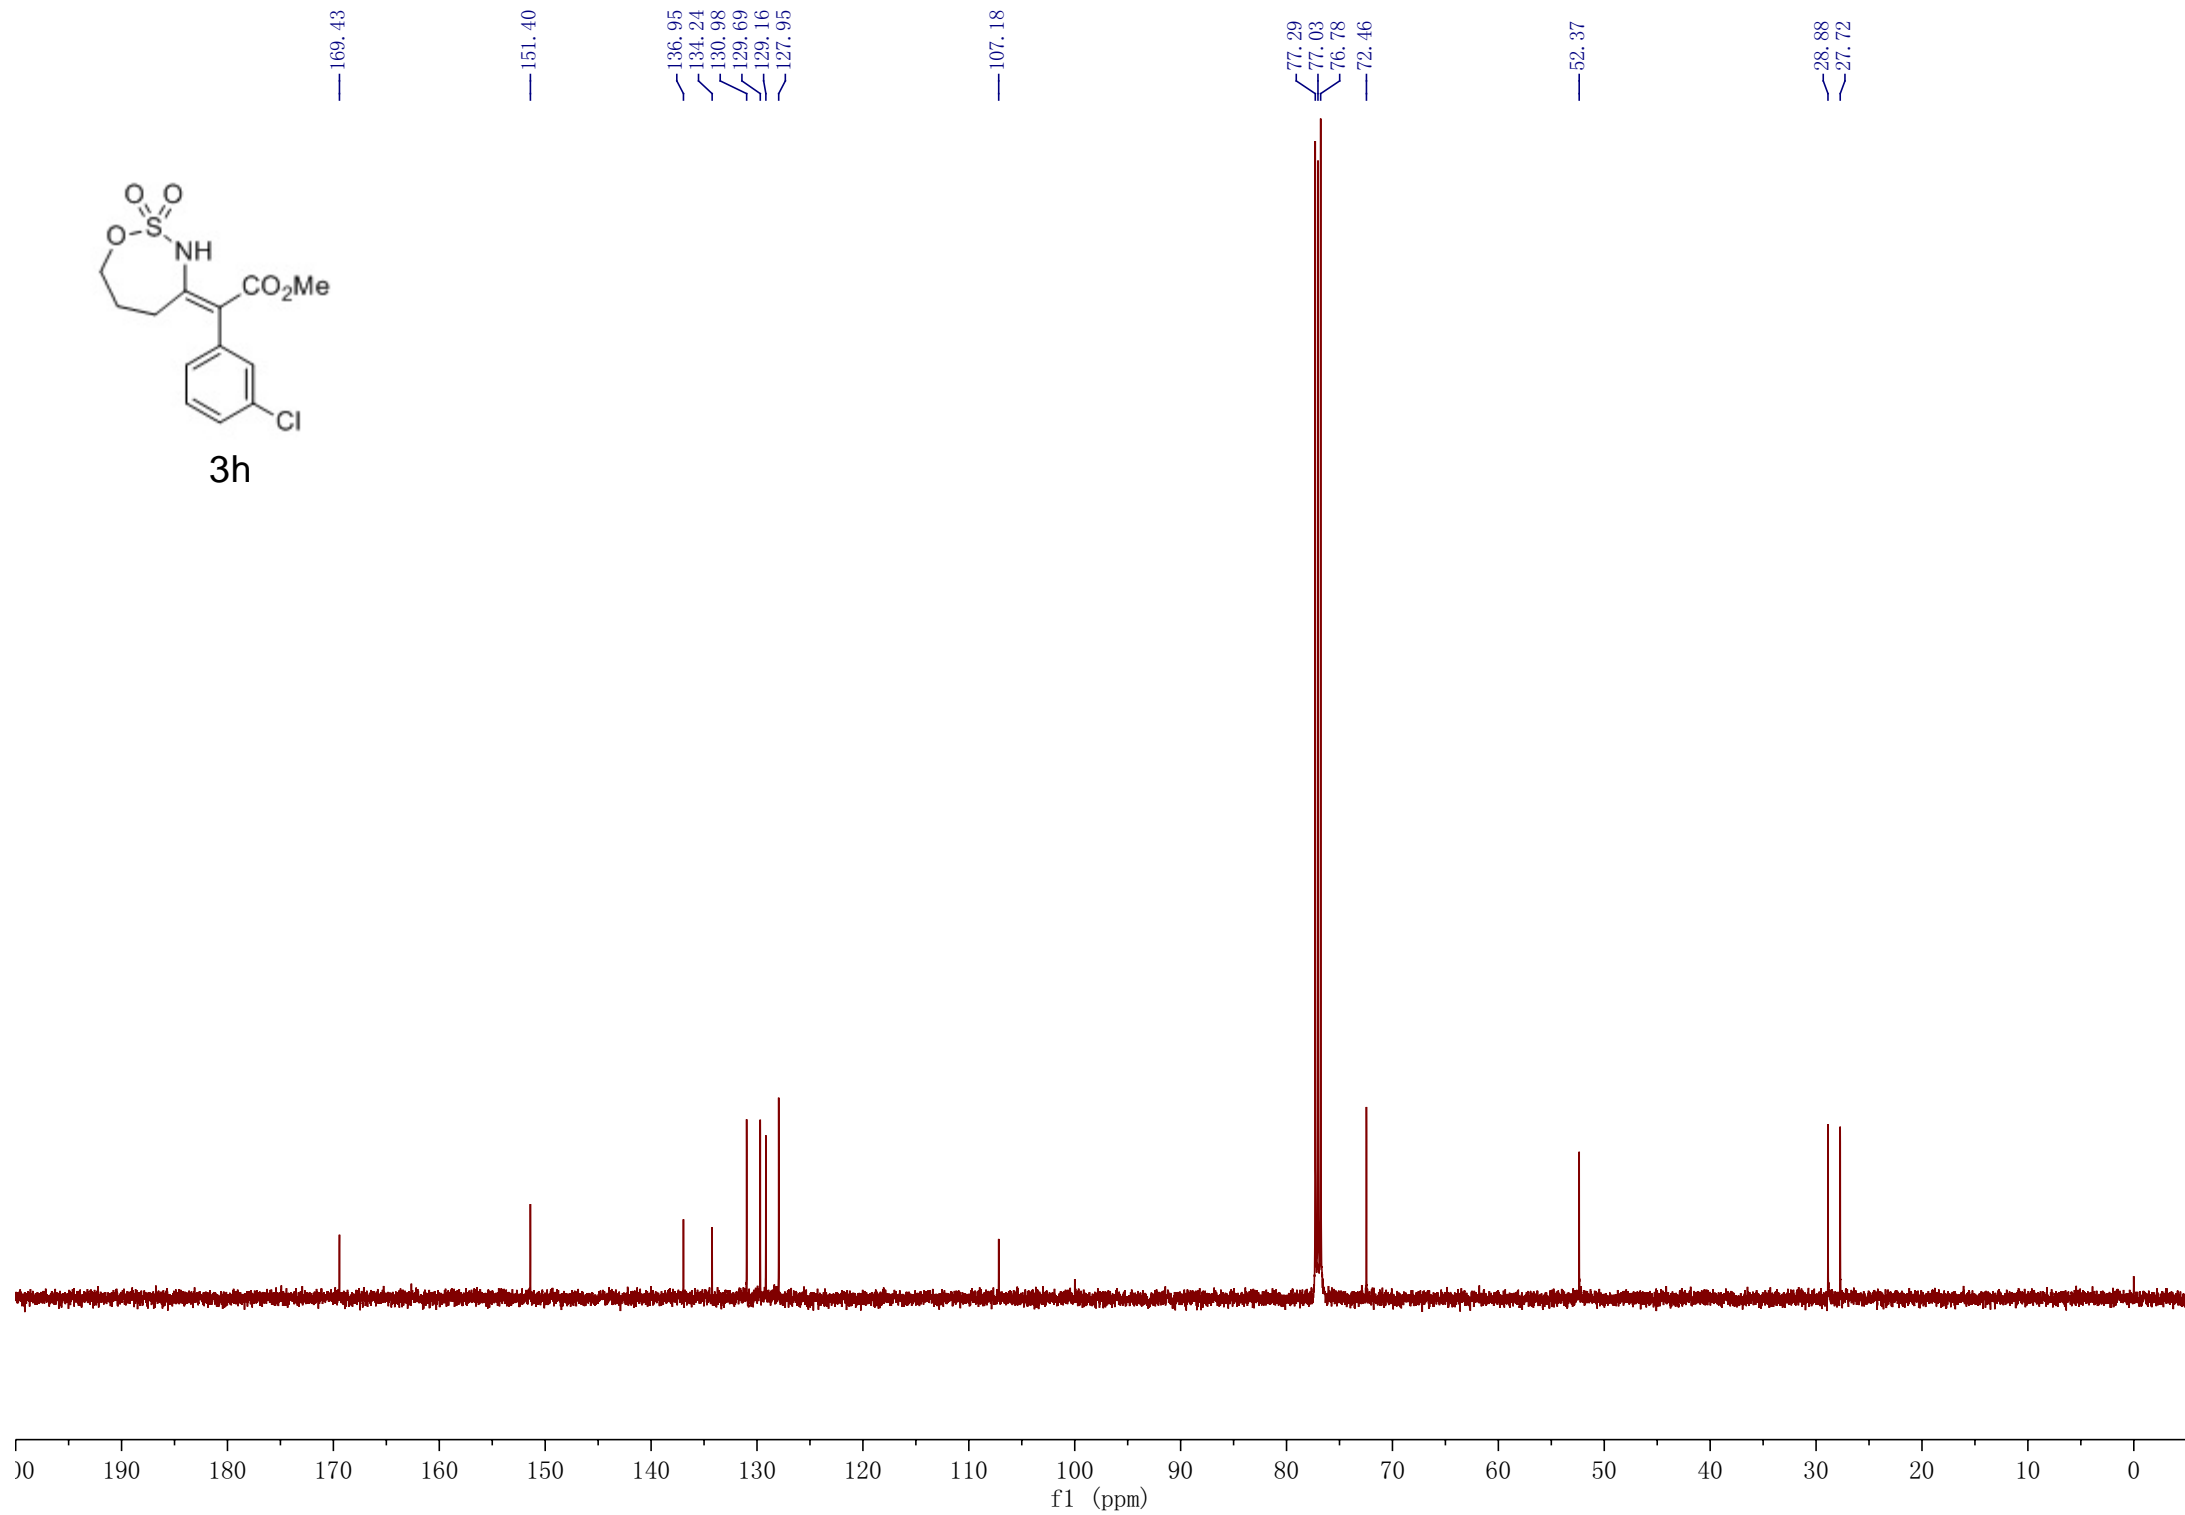

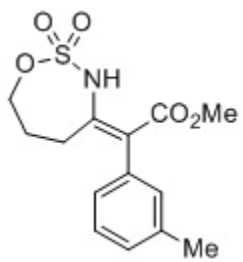

3i

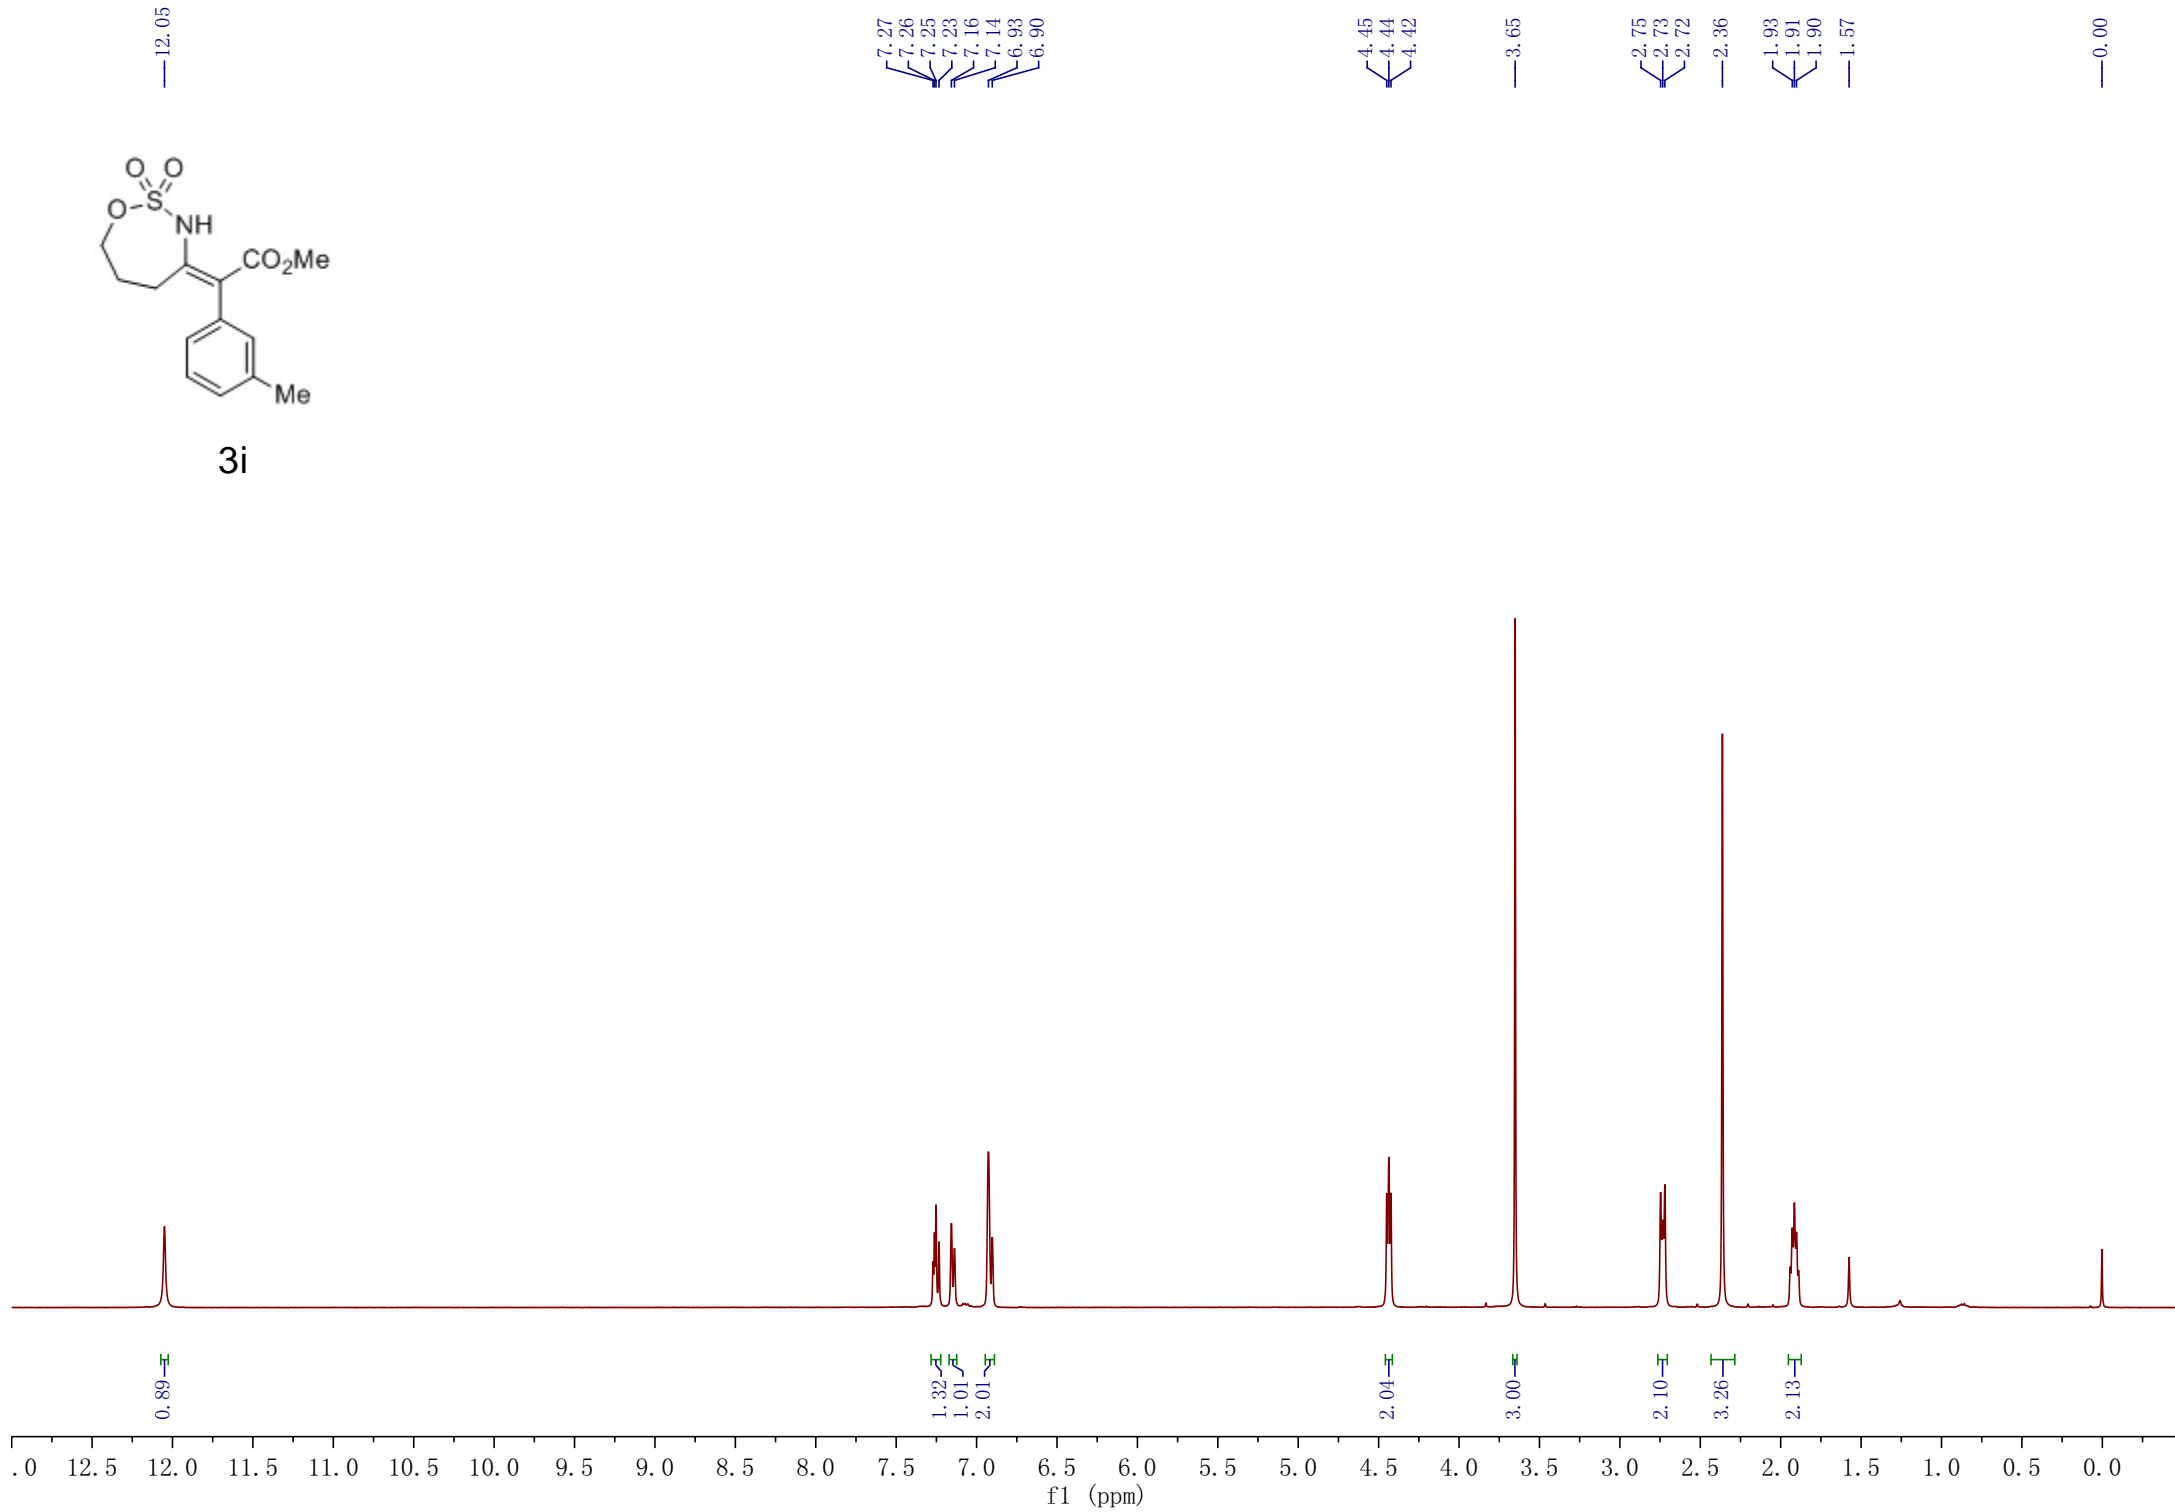

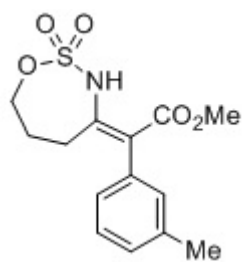

3i

— 170.02

— 150.72

— 138.11

— 135.02

— 131.53

— 128.46

— 128.30

— 127.87

— 108.55

77.38

77.07

76.75

72.50

— 52.30

— 28.86

— 27.86

— 21.45



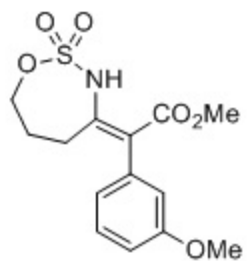

3j

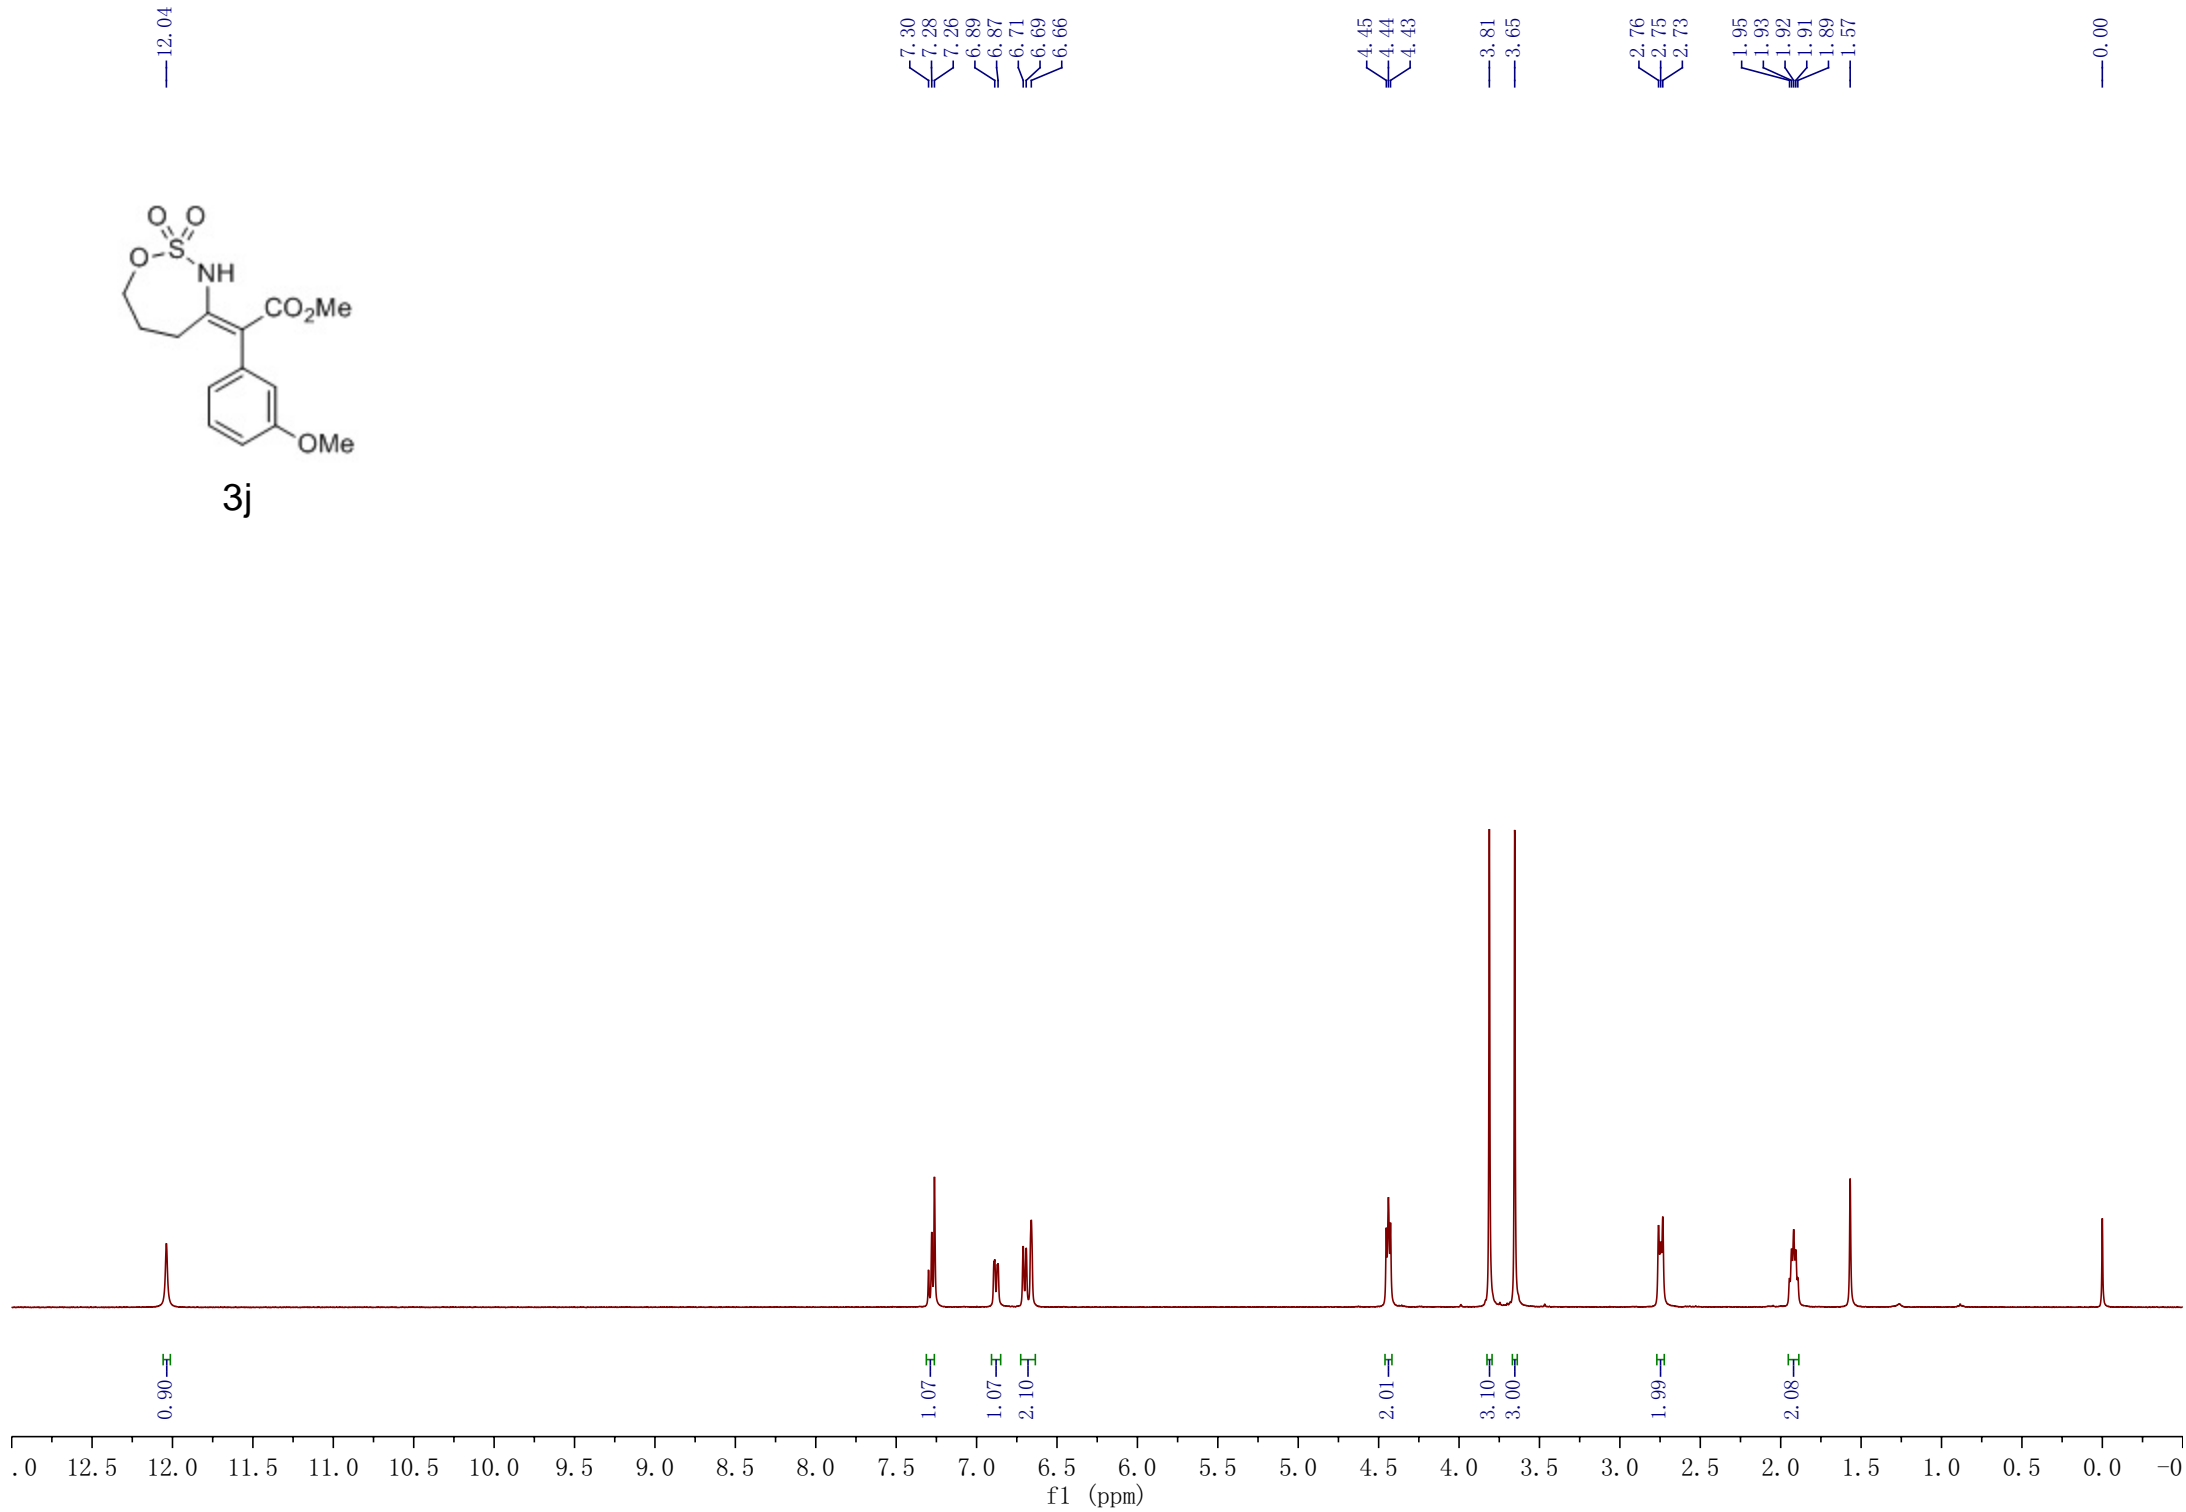

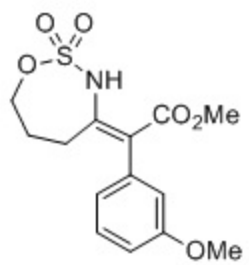

3j

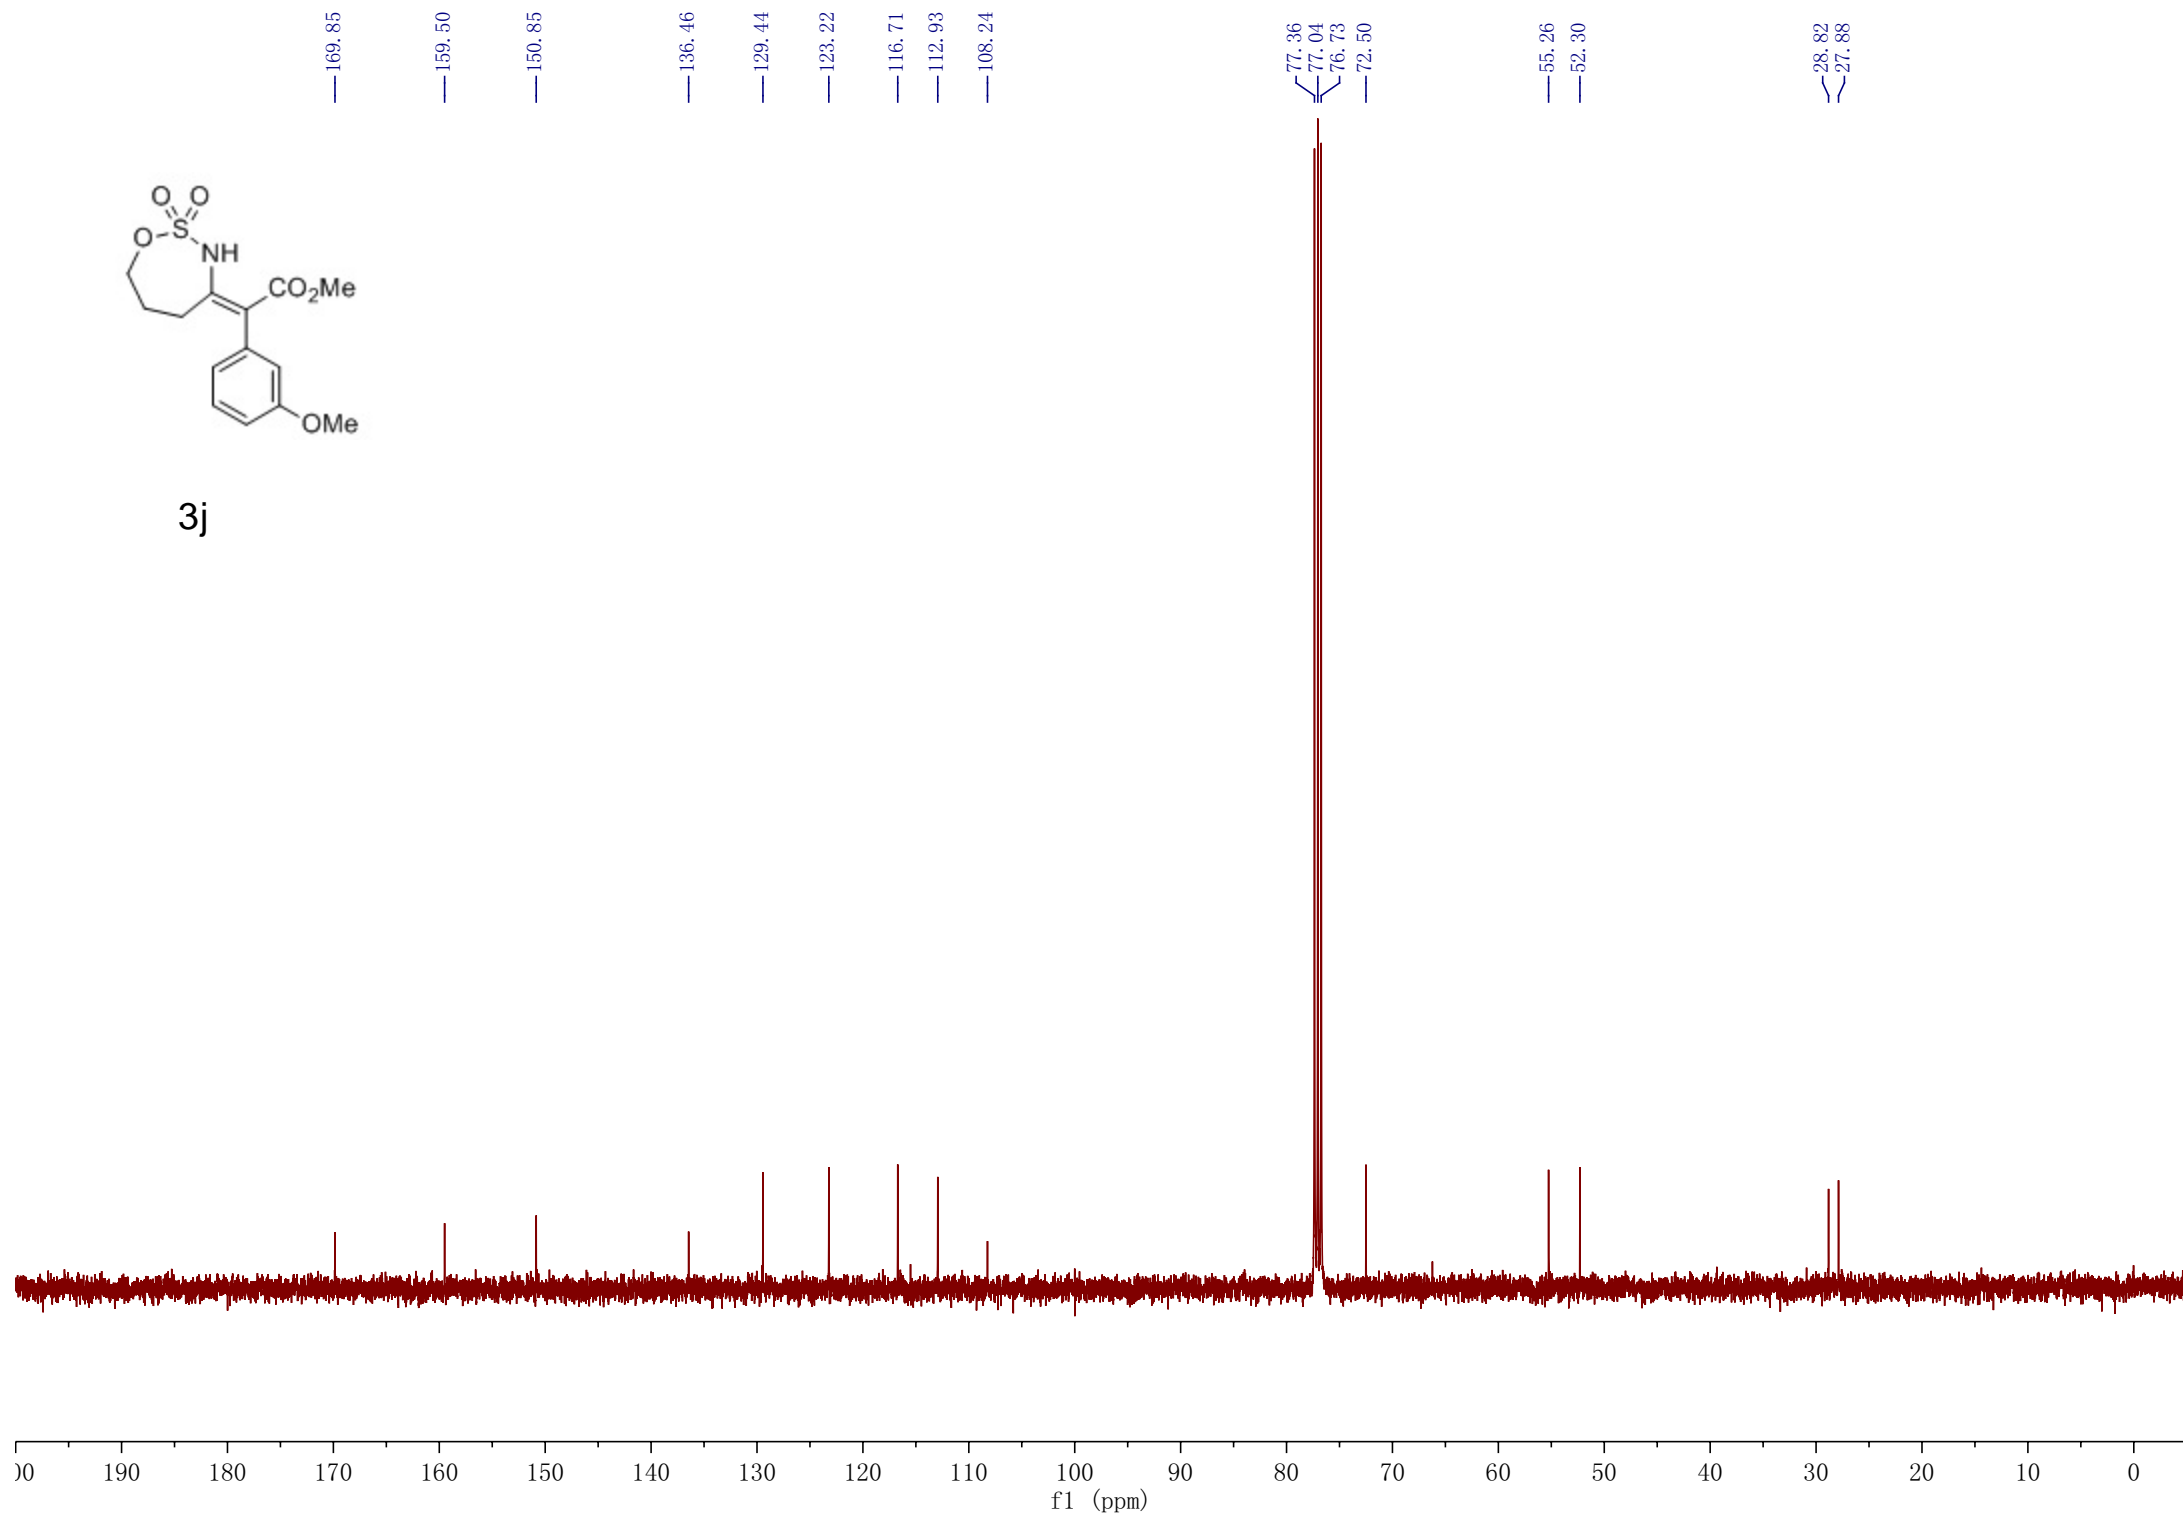

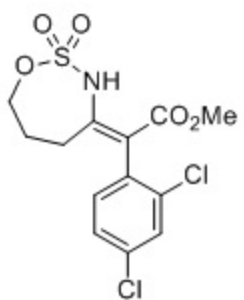

3k

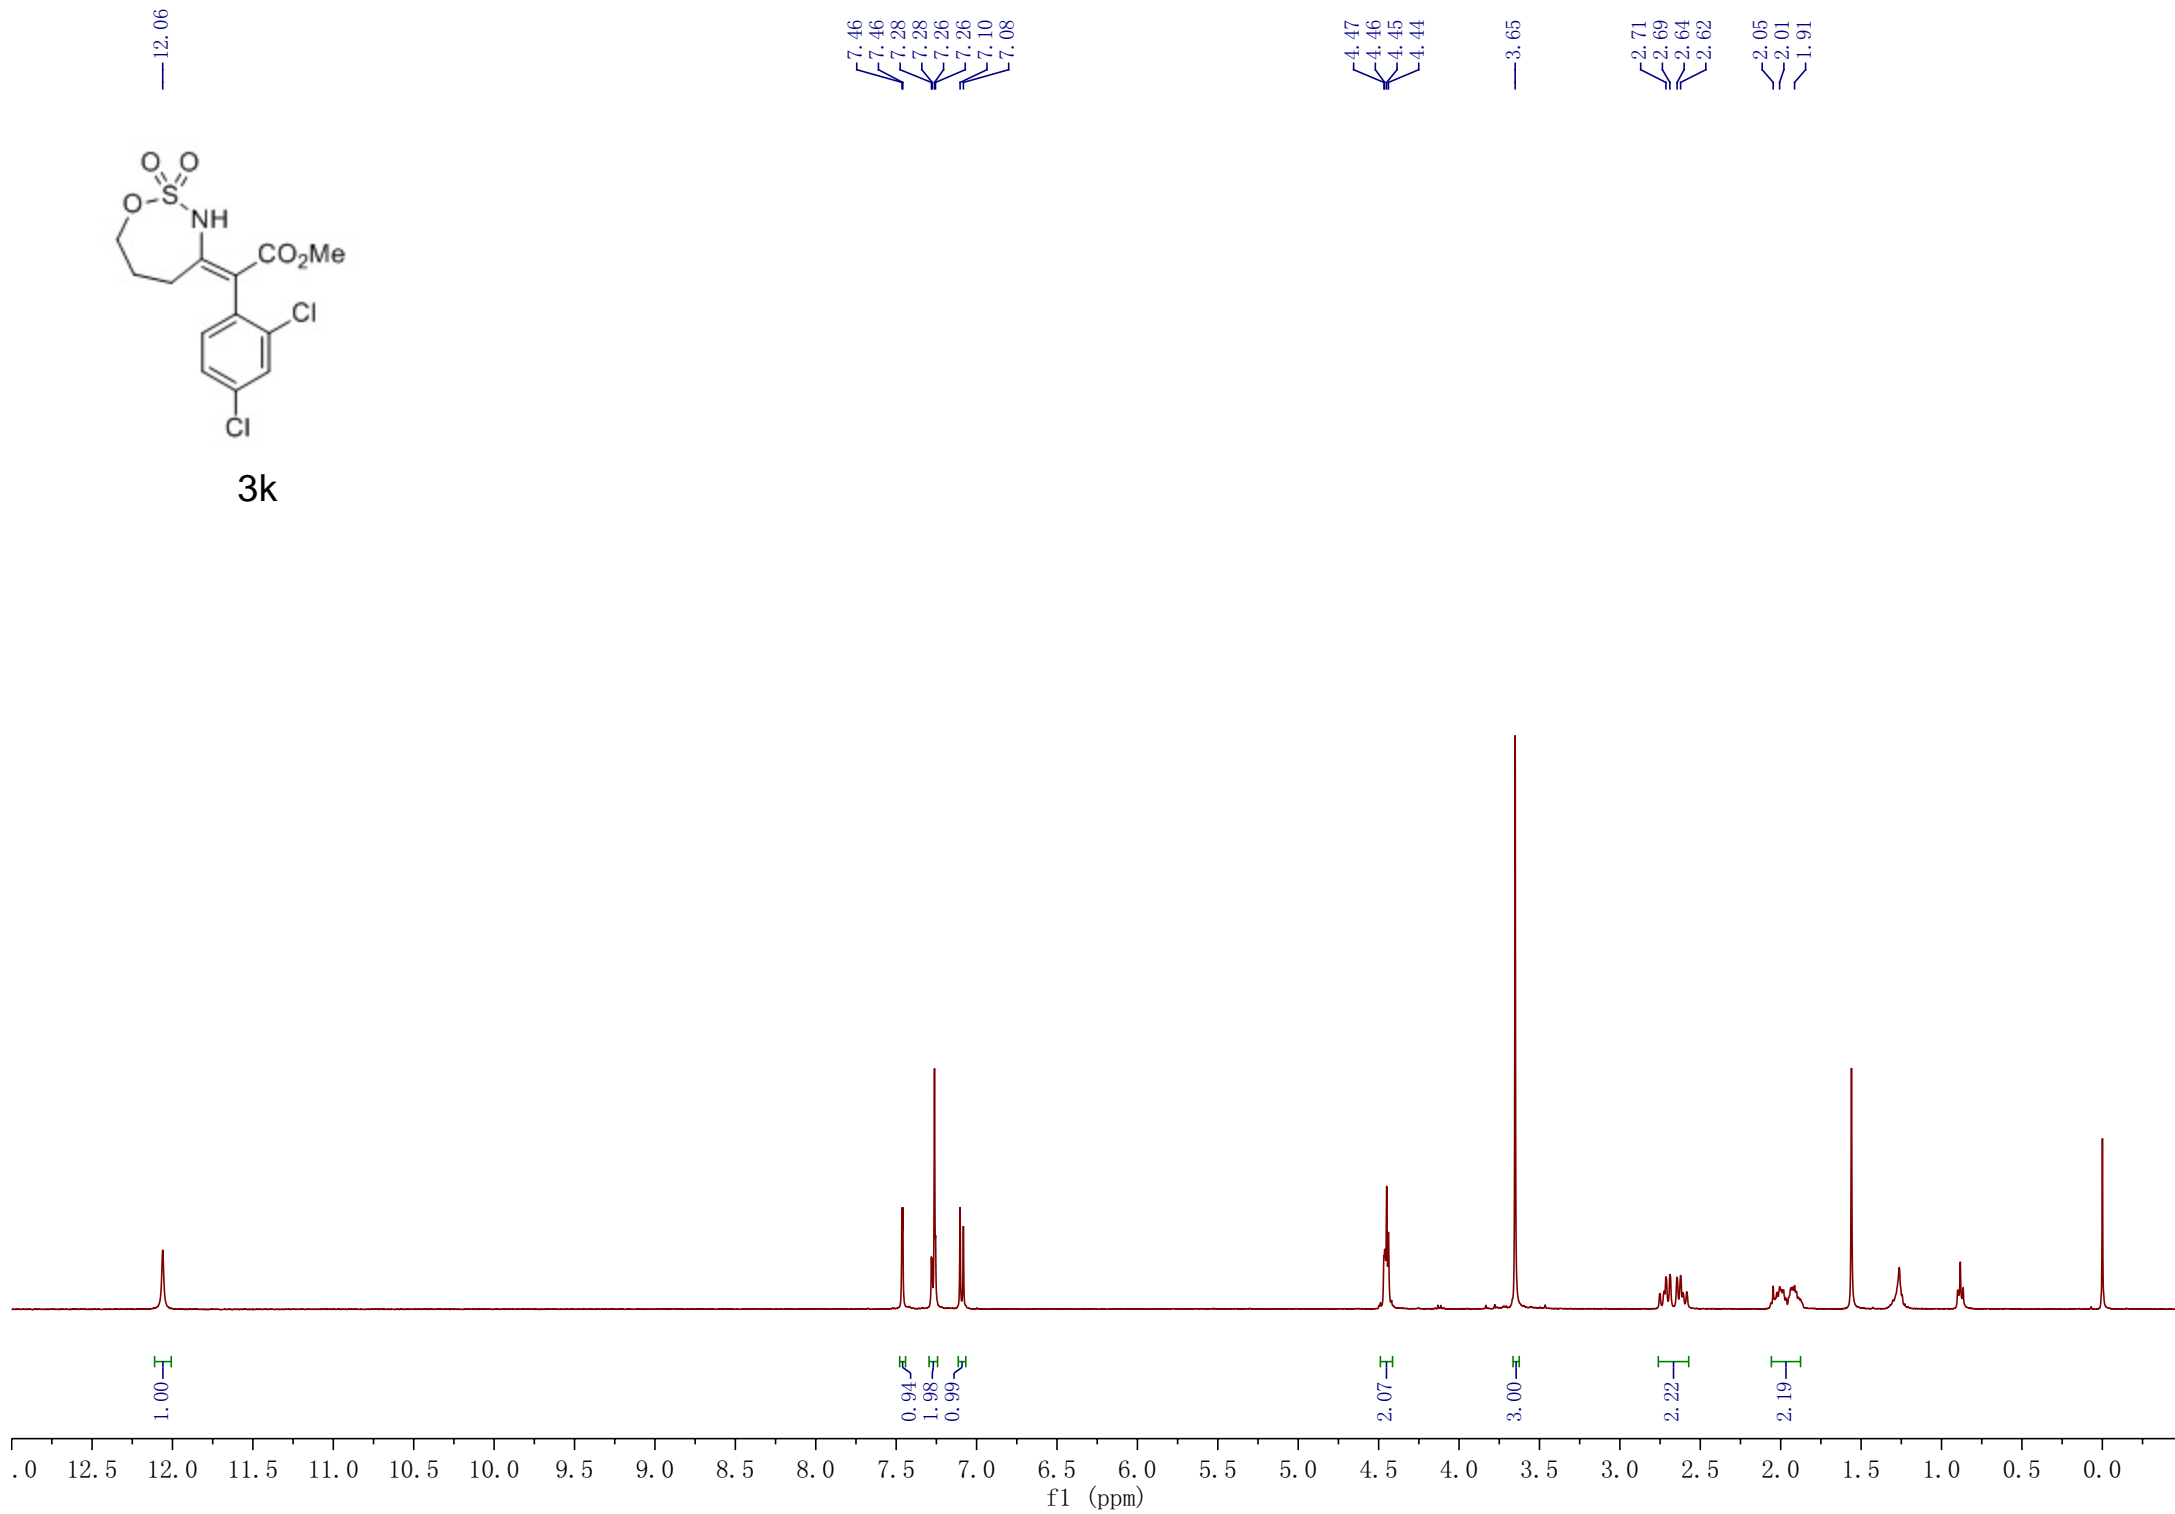



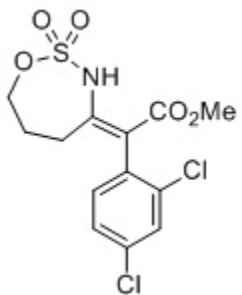

3k

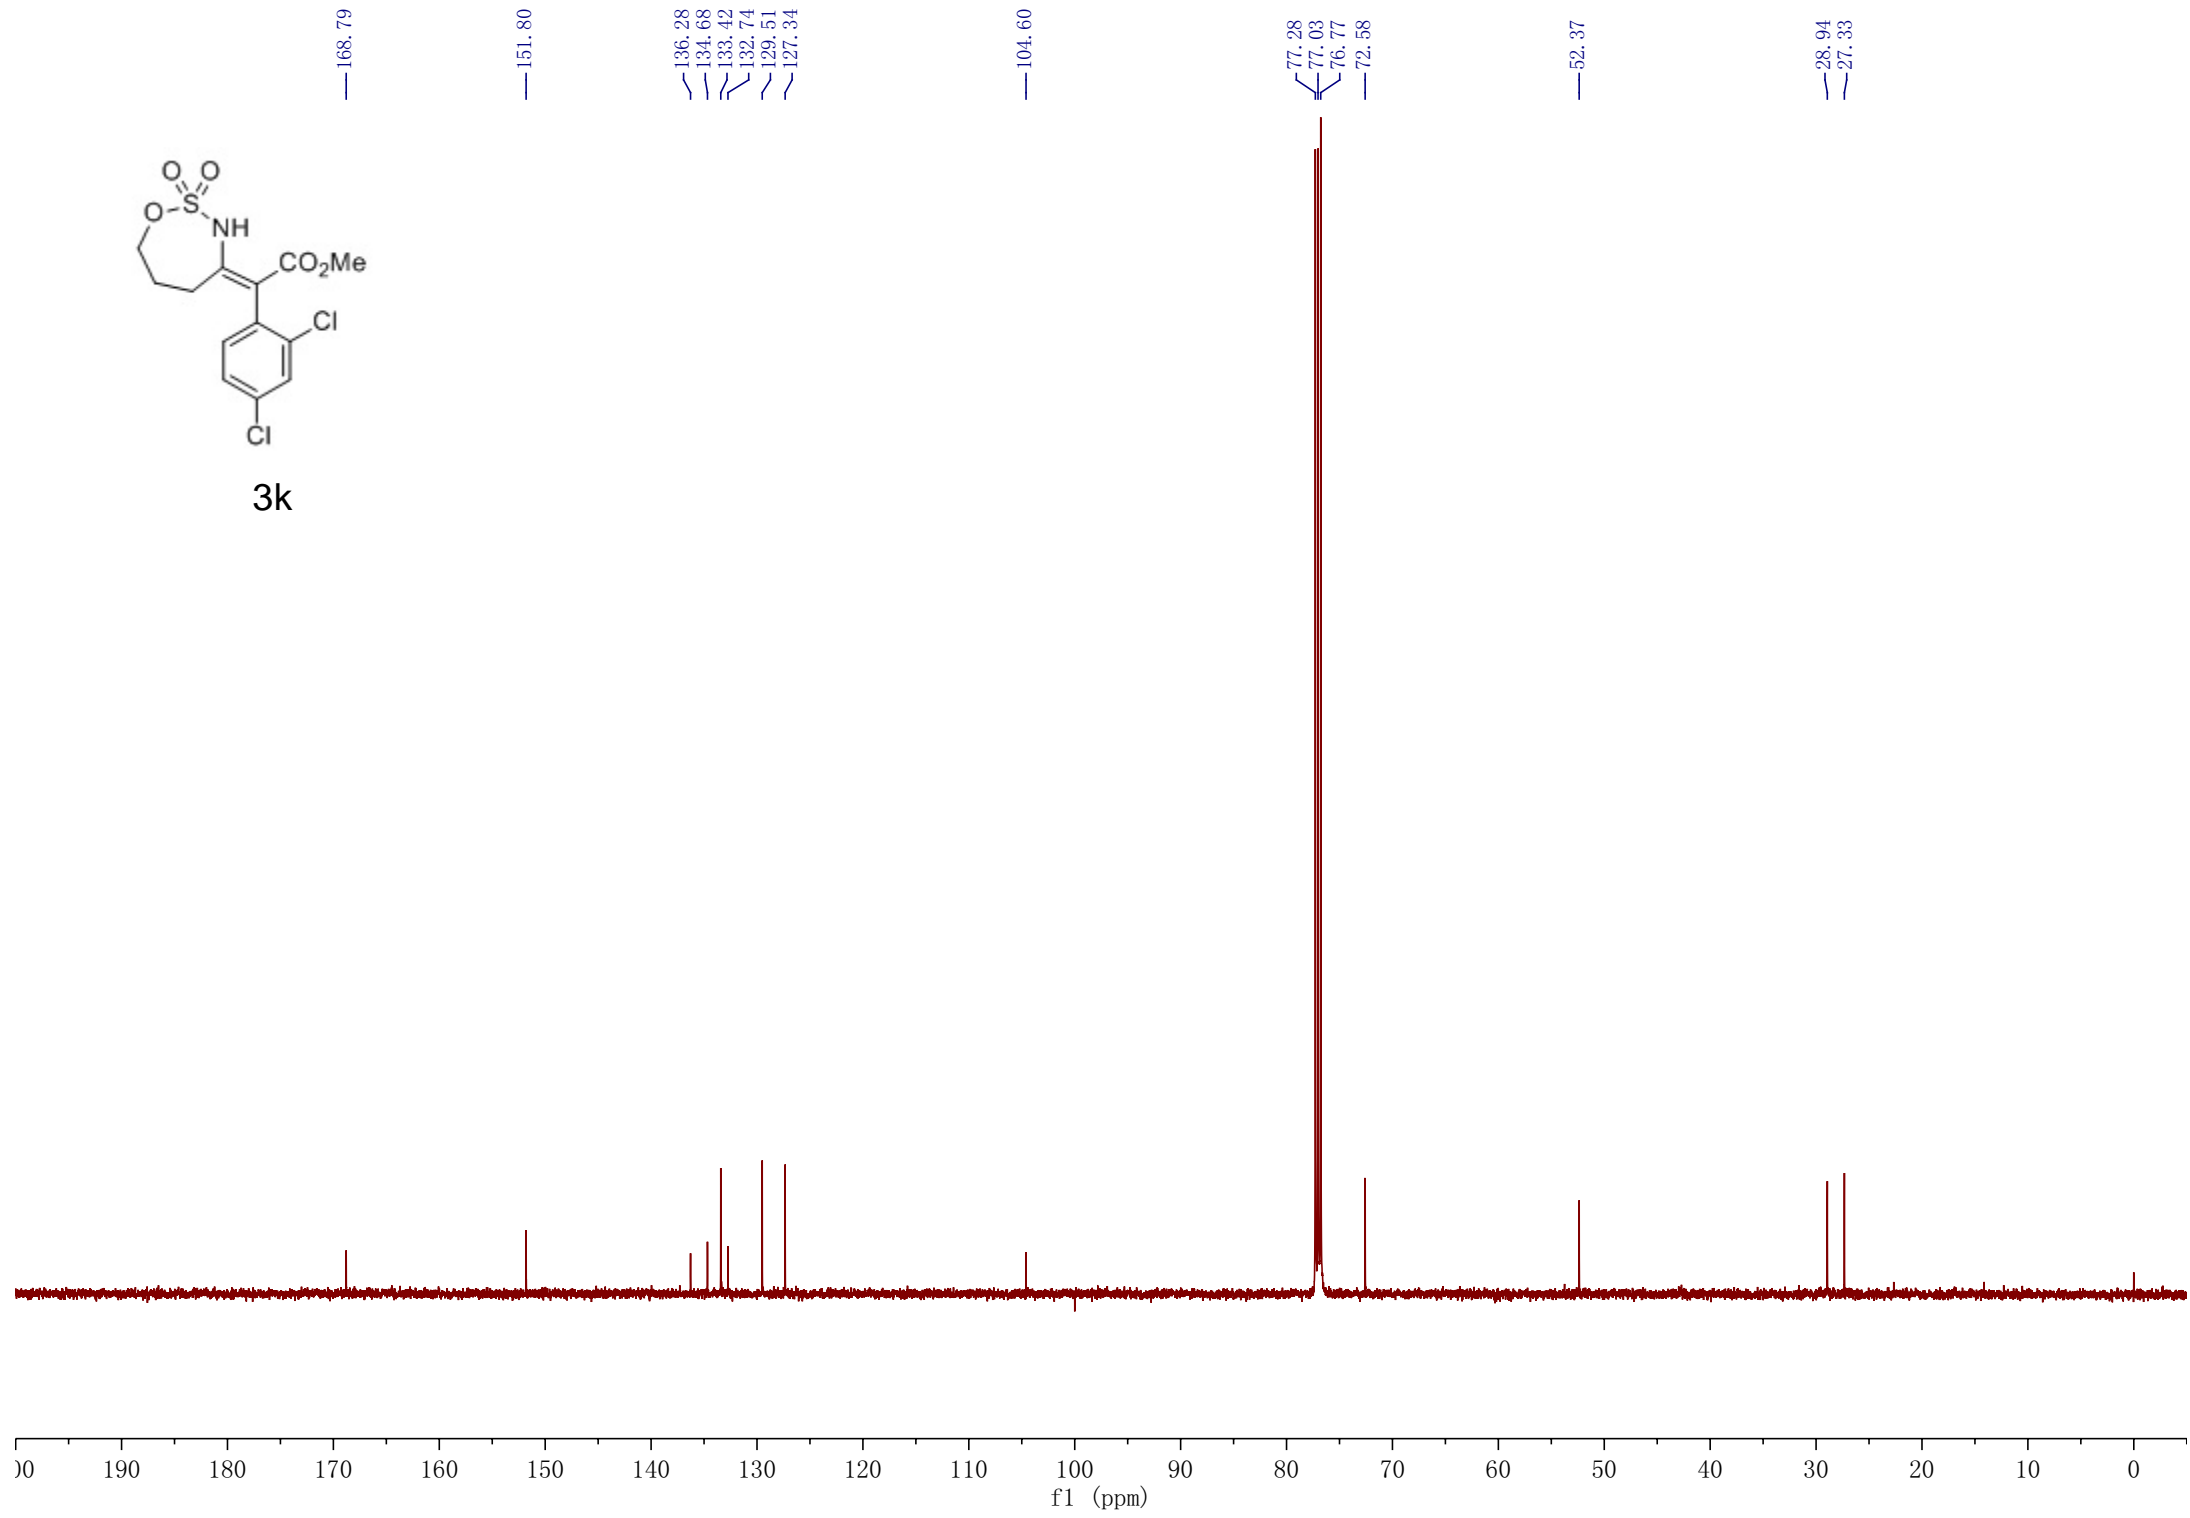

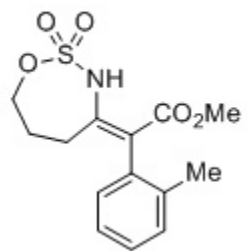

3l

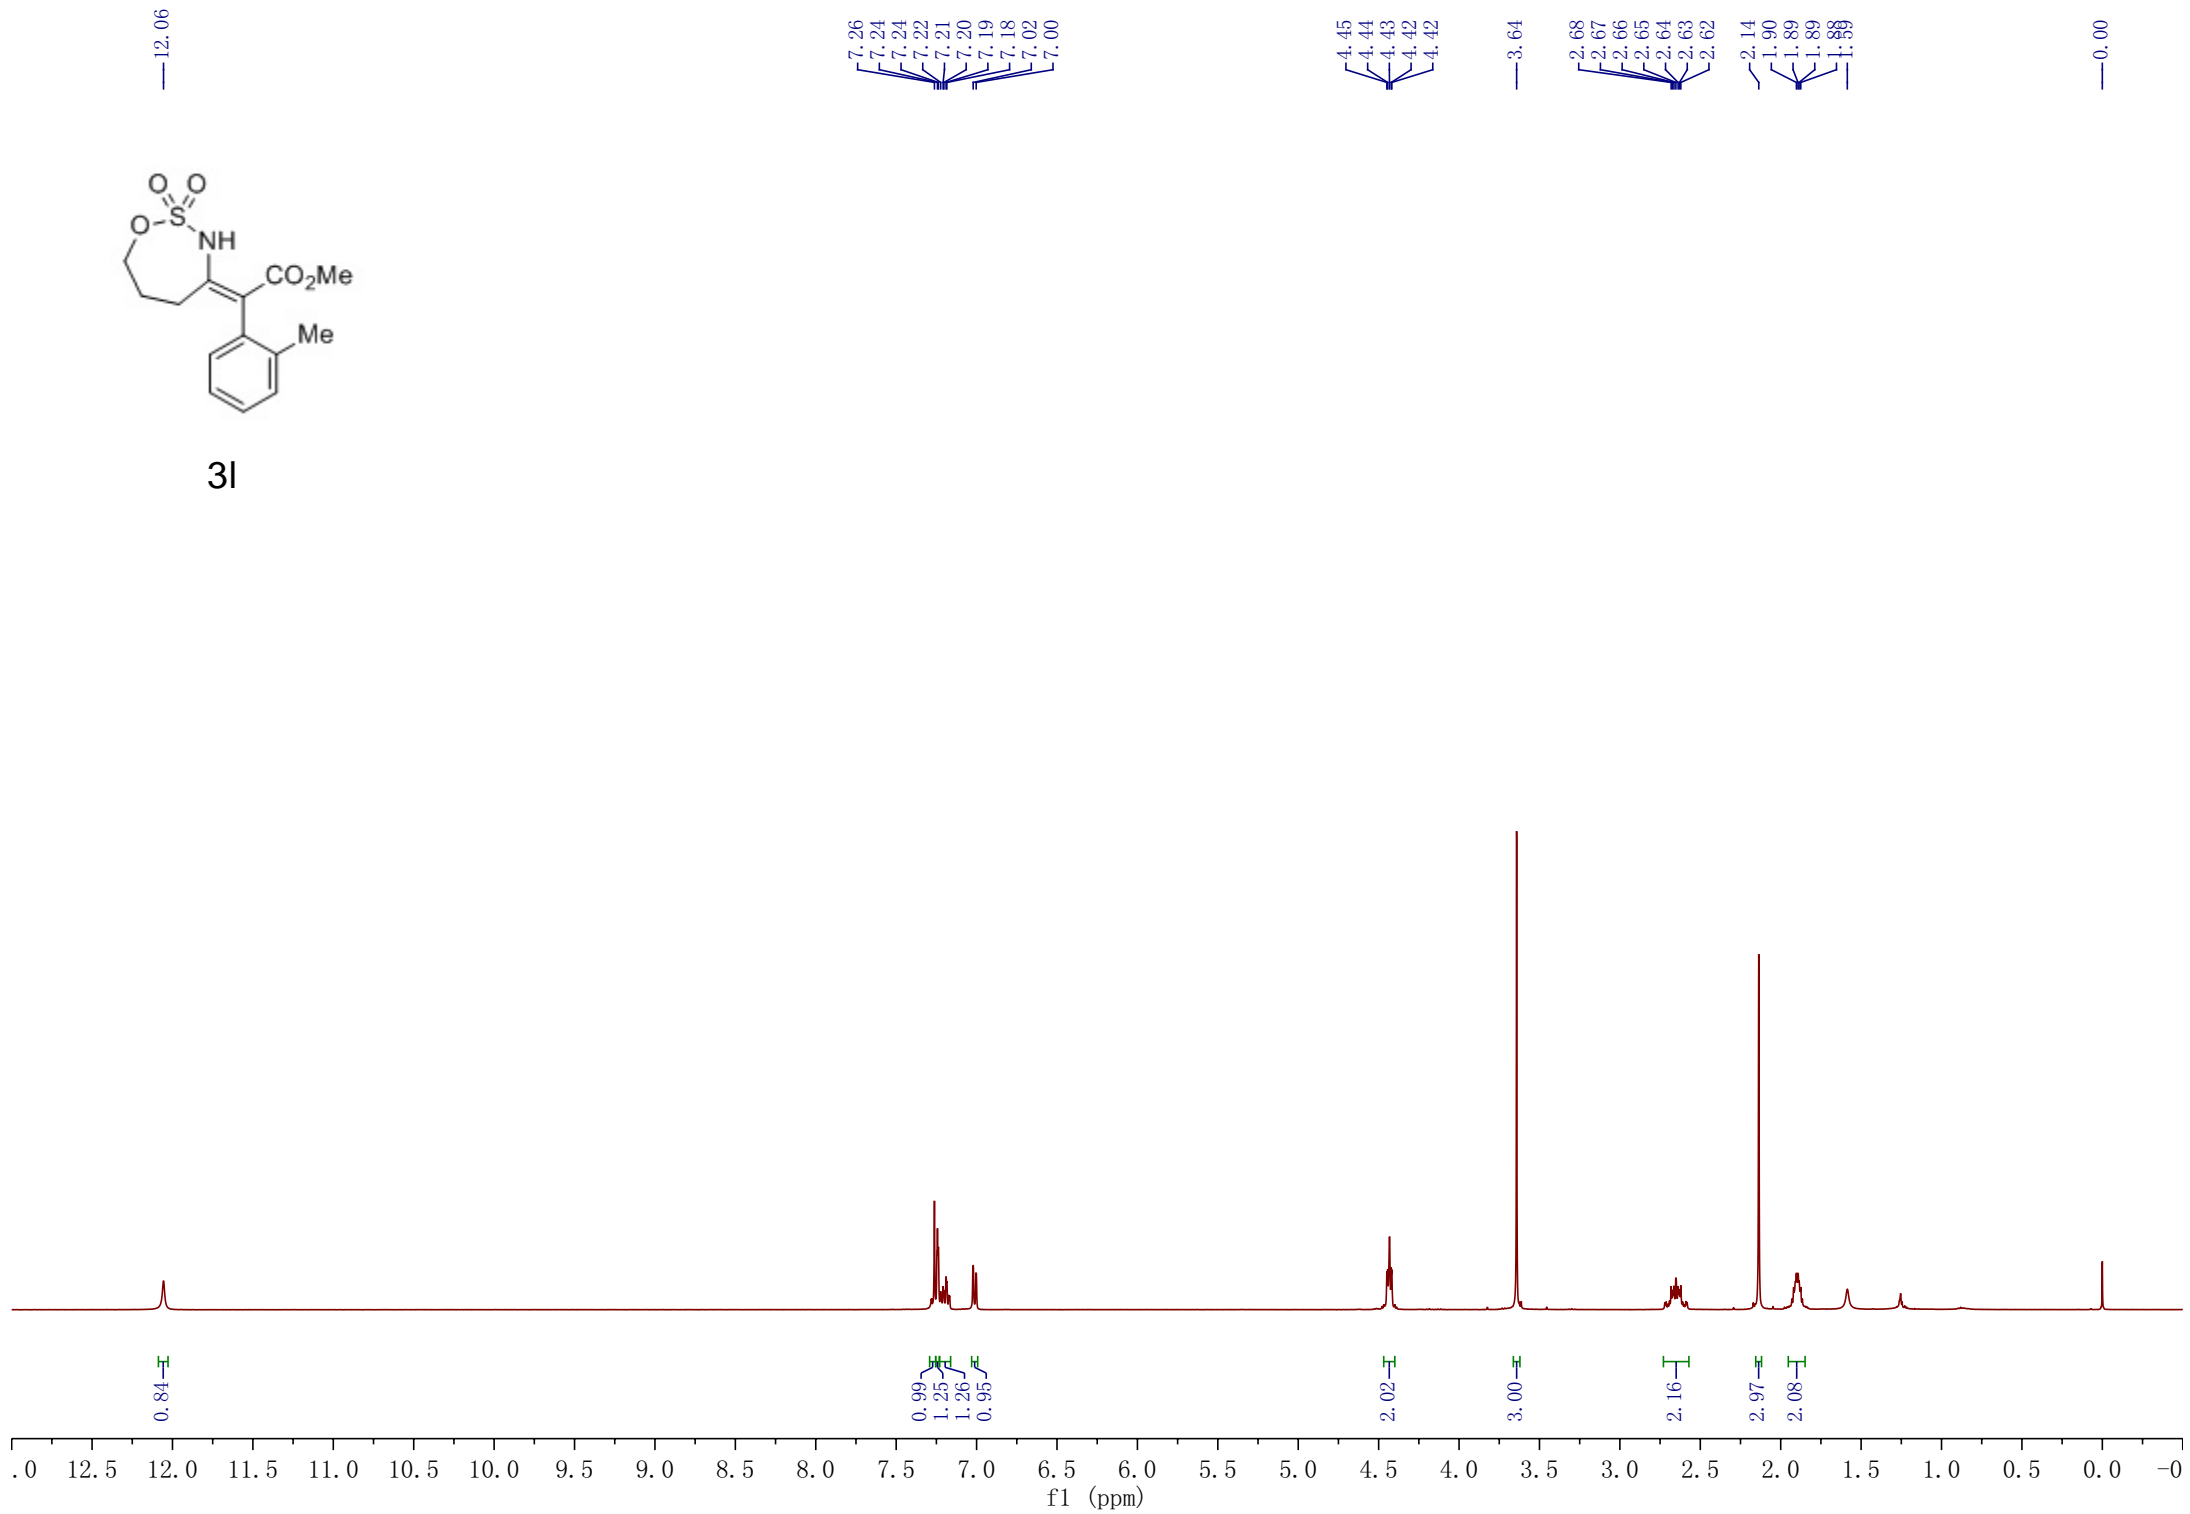



3I

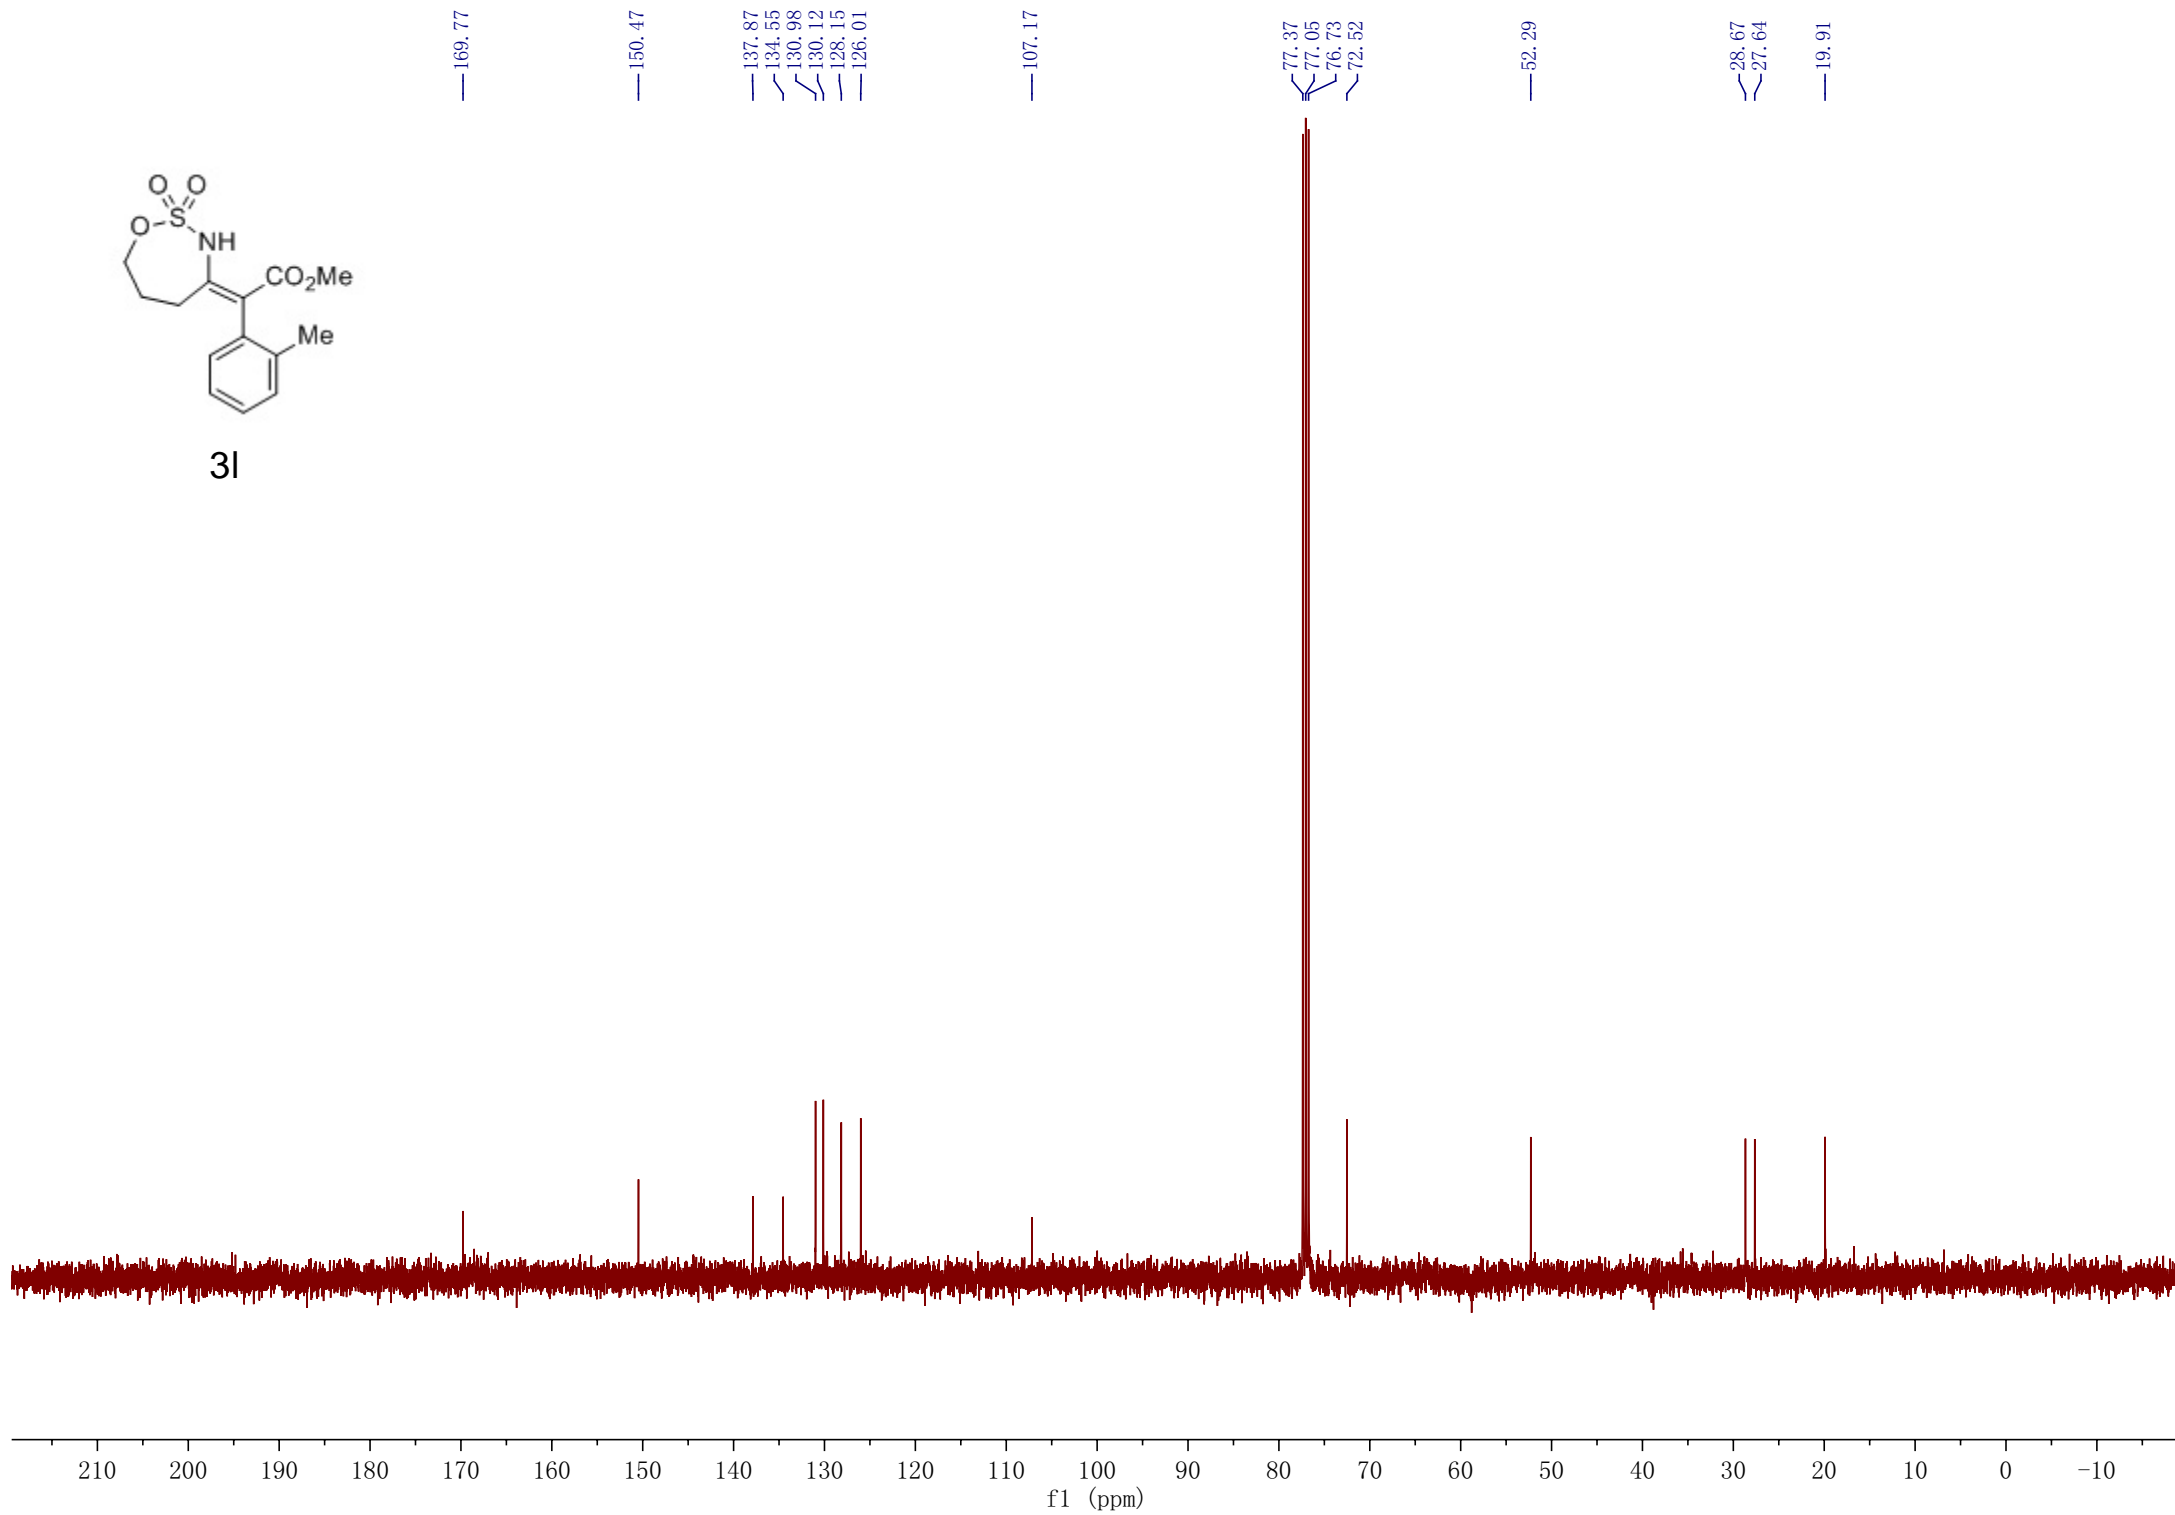

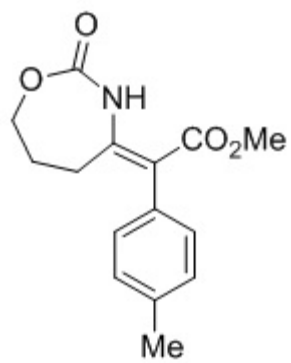

30

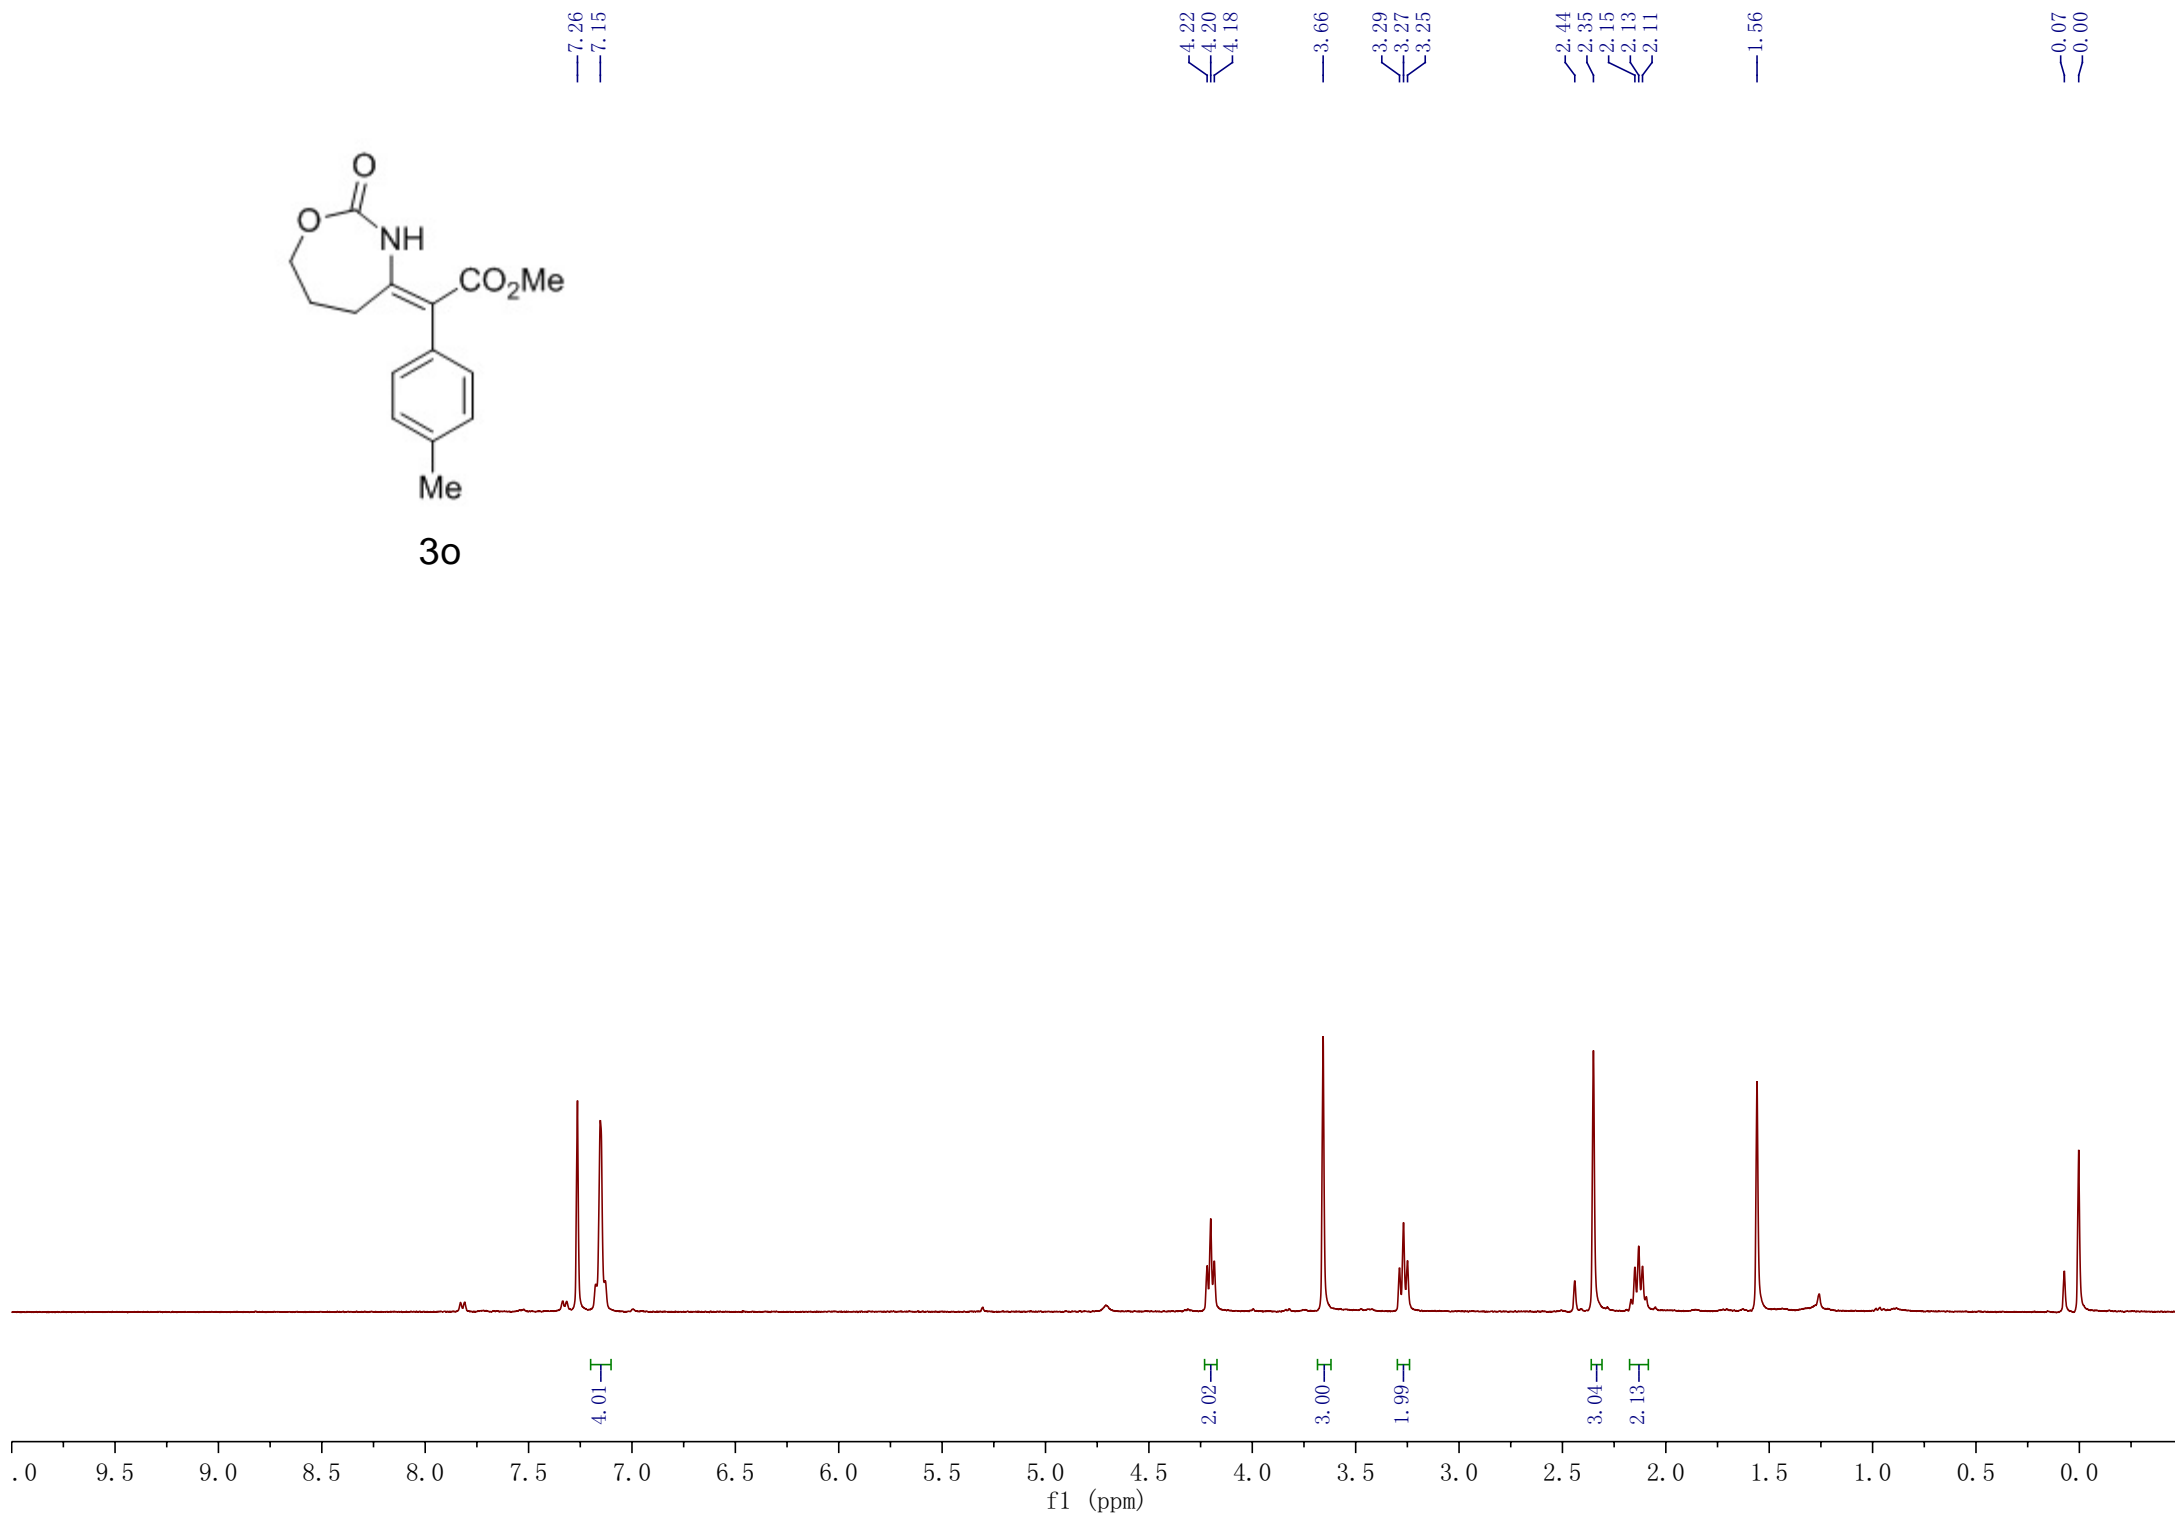

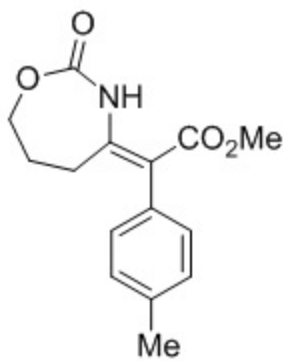

30

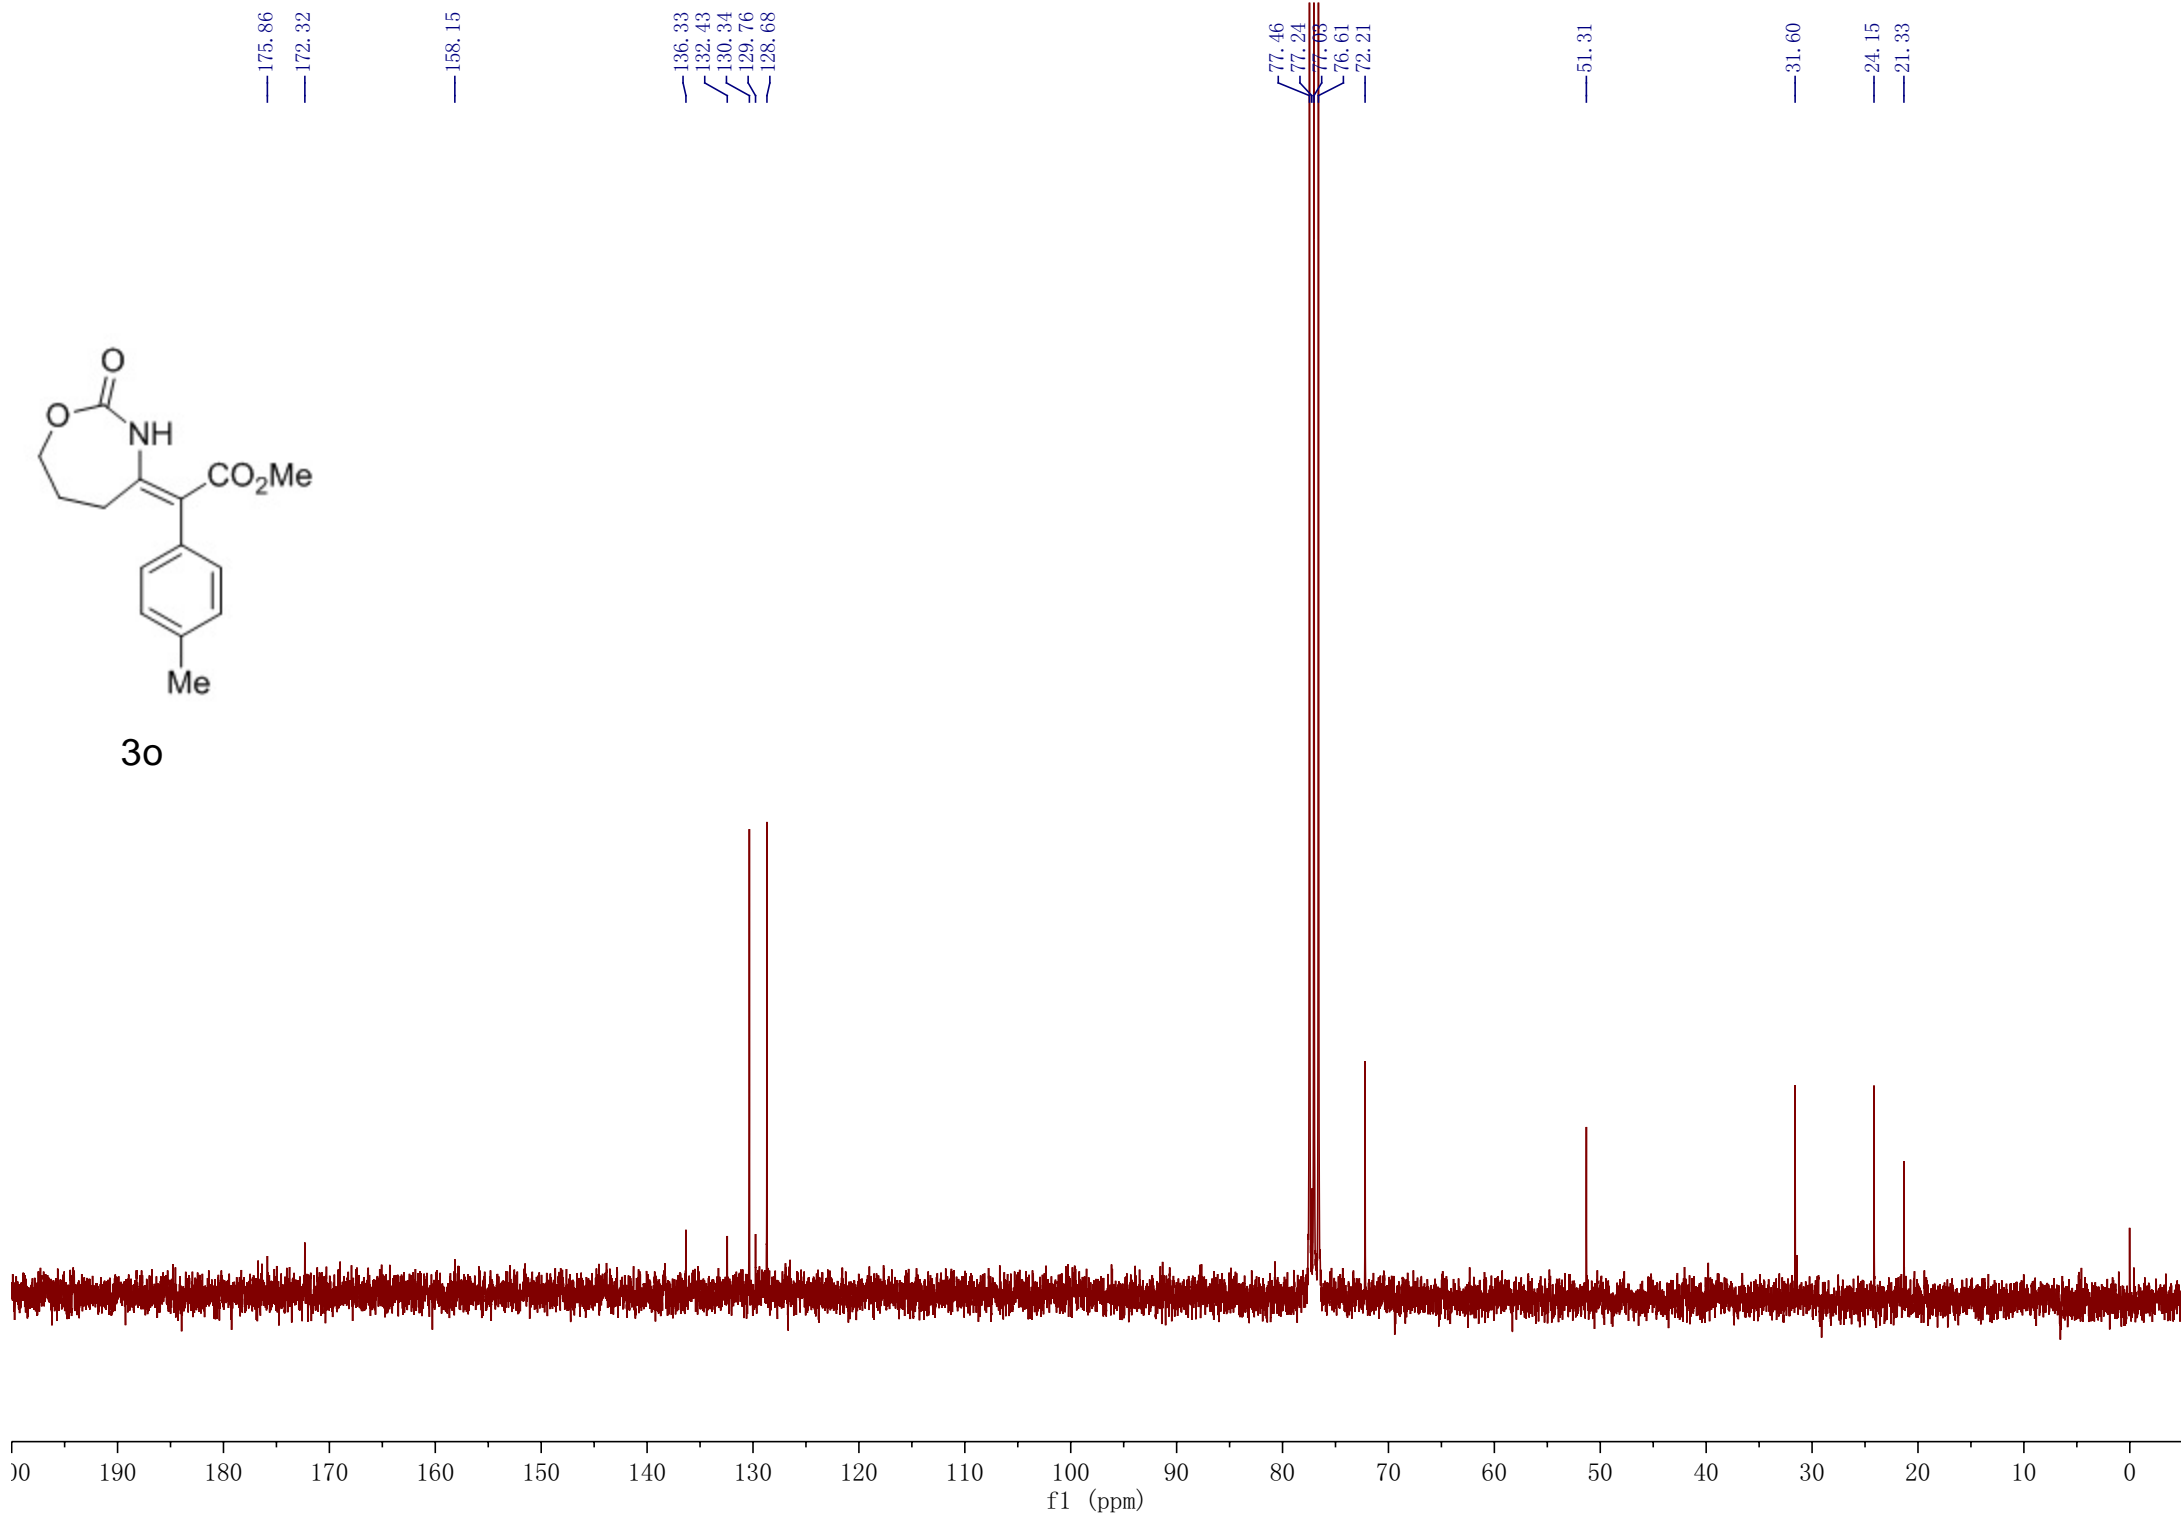

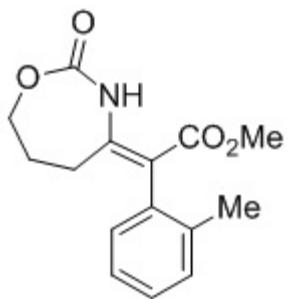

3p

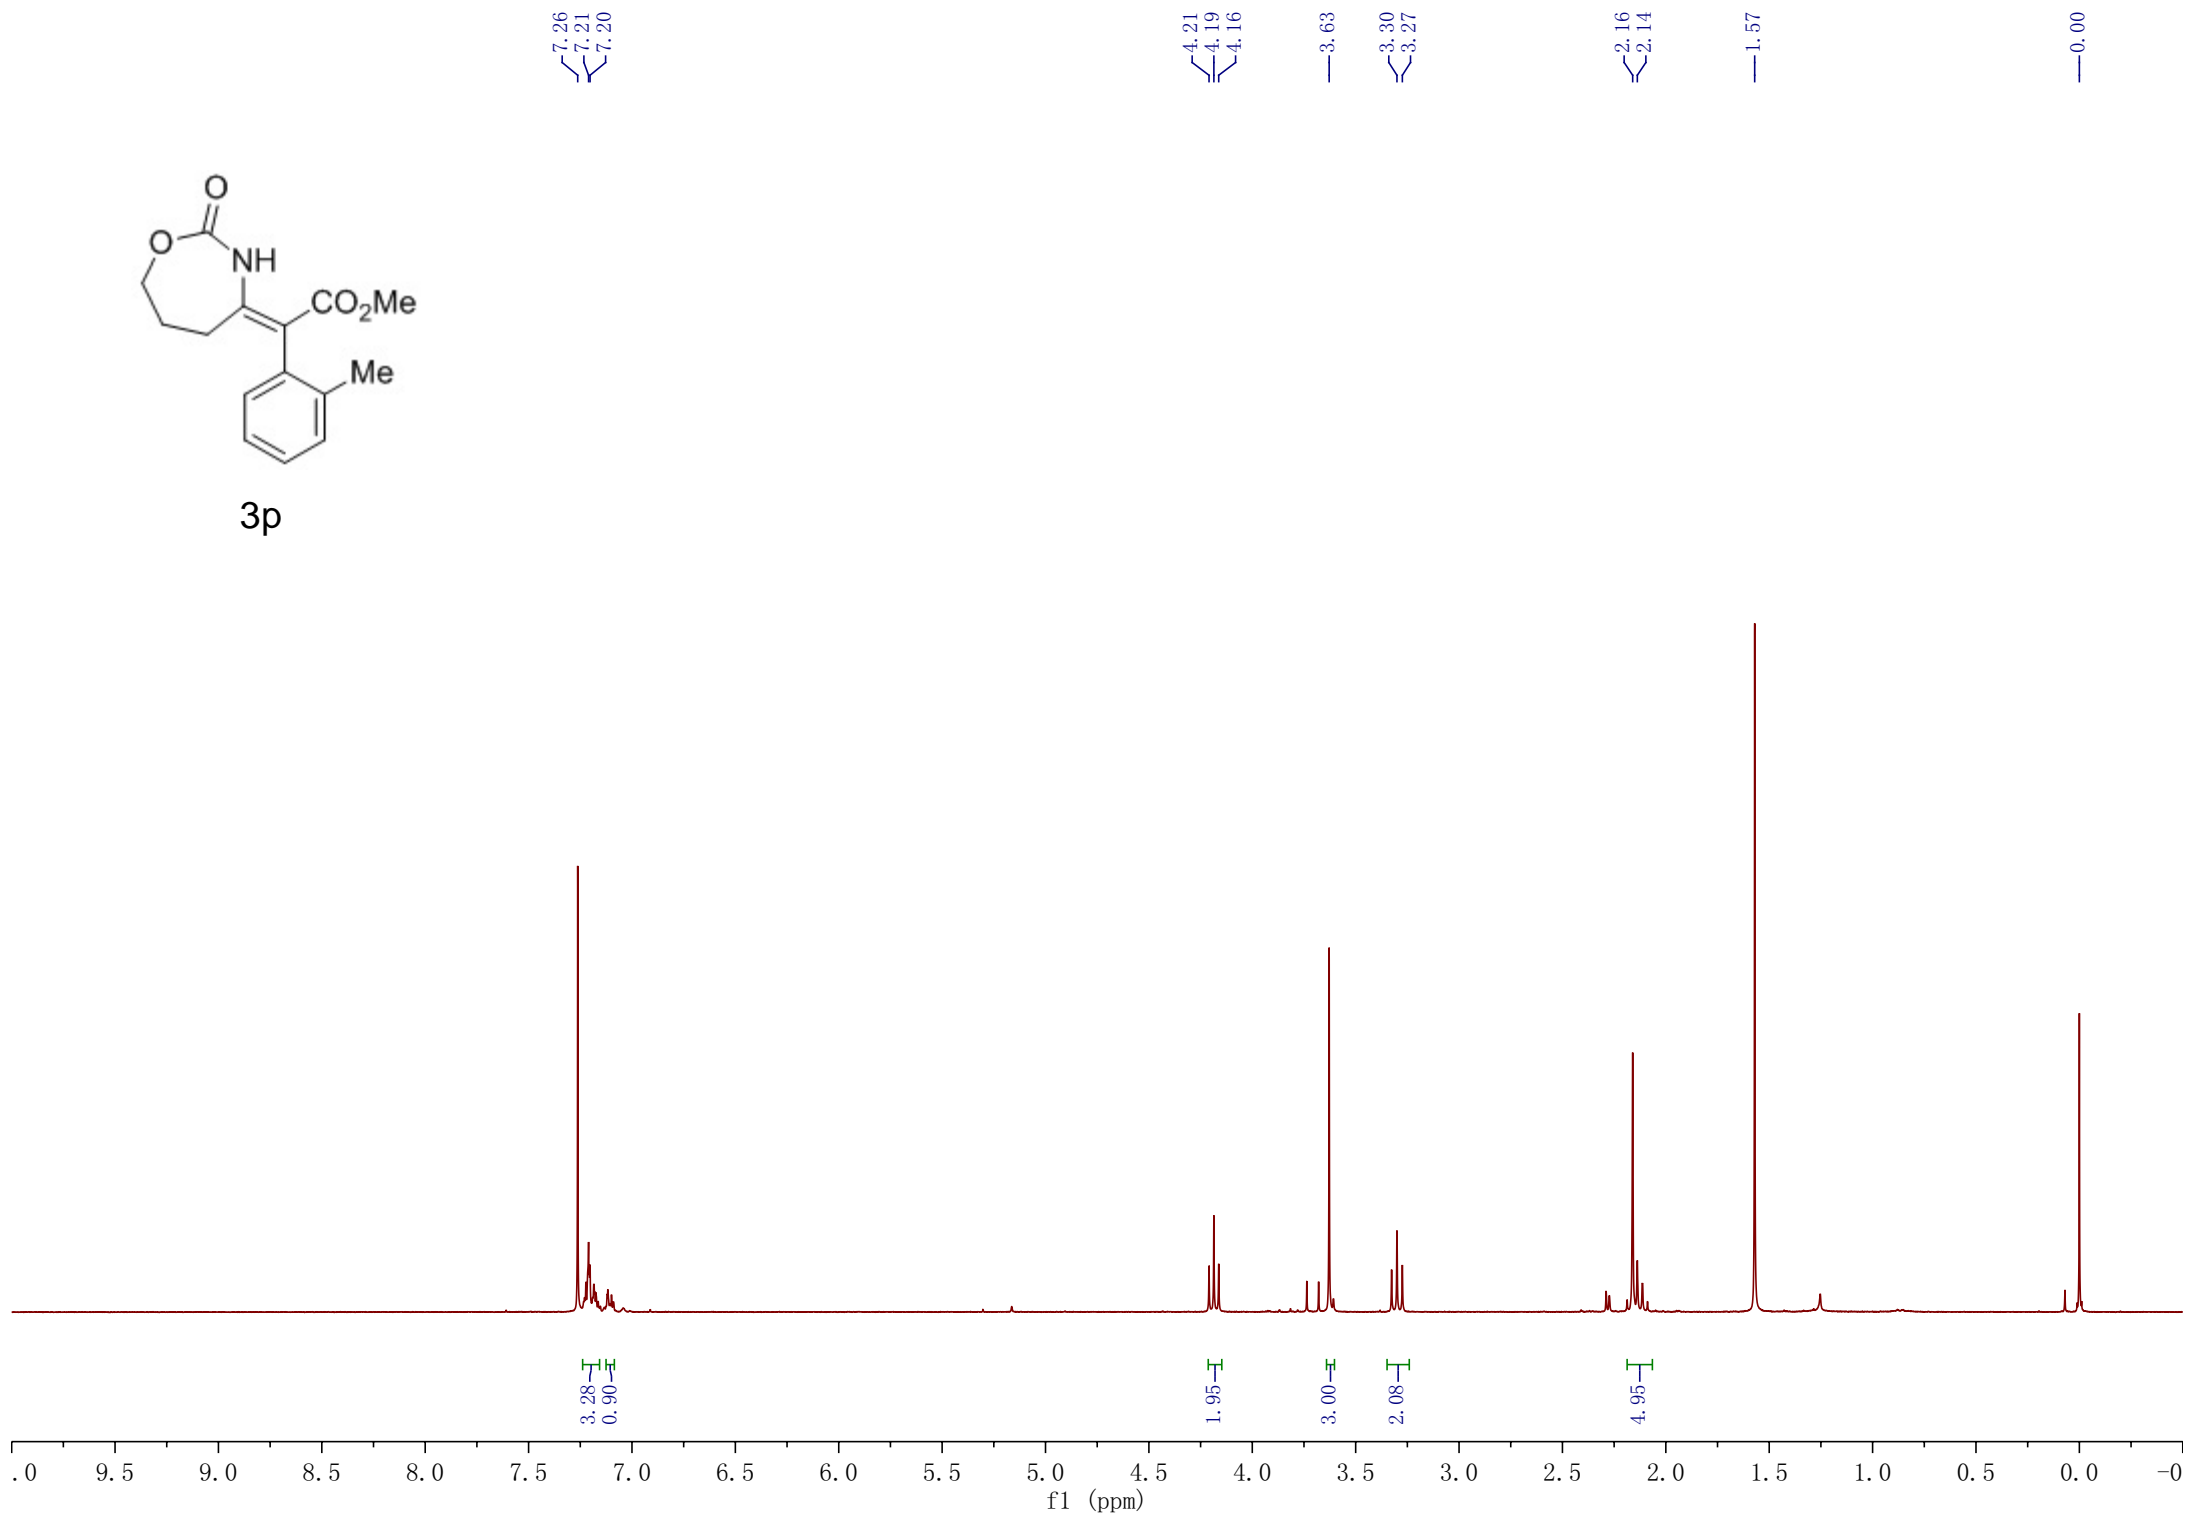

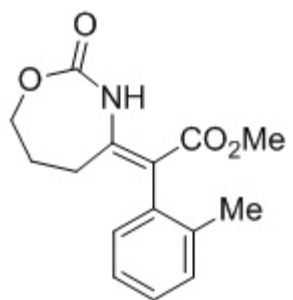

3p

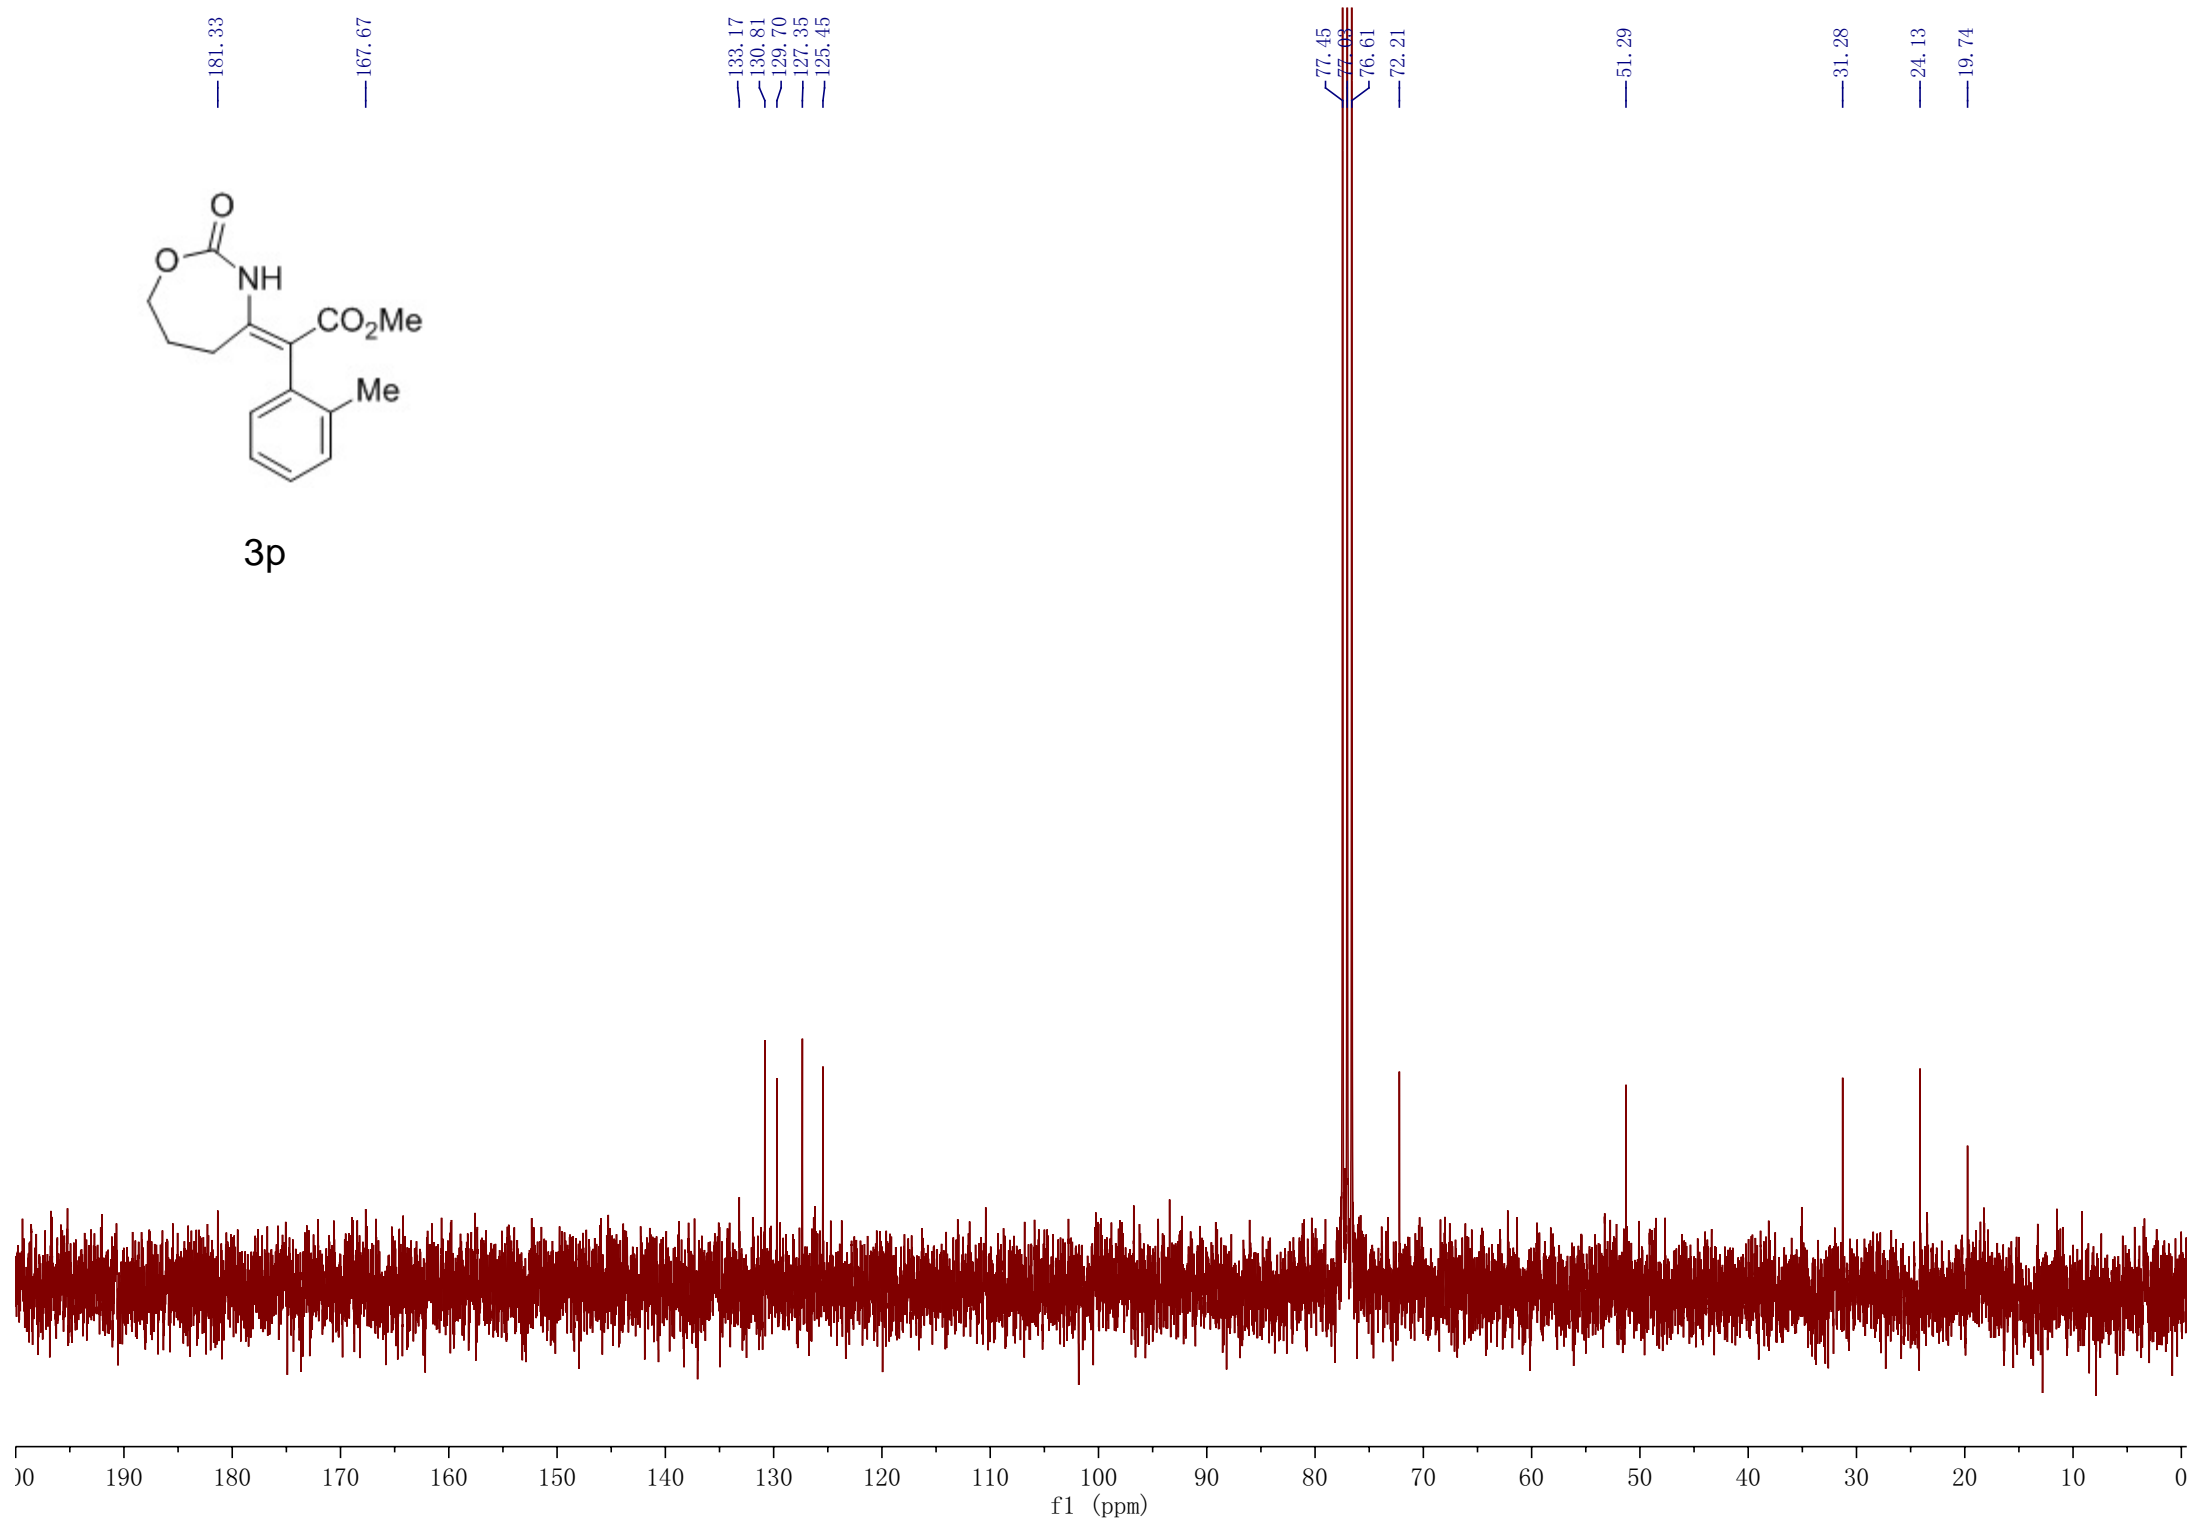

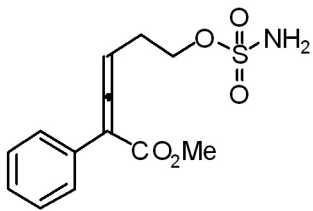

3a'

7.49  
7.49  
7.46  
7.46  
7.39  
7.39  
7.37  
7.36  
7.35  
7.34  
7.33  
7.32  
7.32  
7.26

5.89  
5.86  
5.84

4.79

4.37  
4.35  
4.33

2.68  
2.66  
2.64

1.59

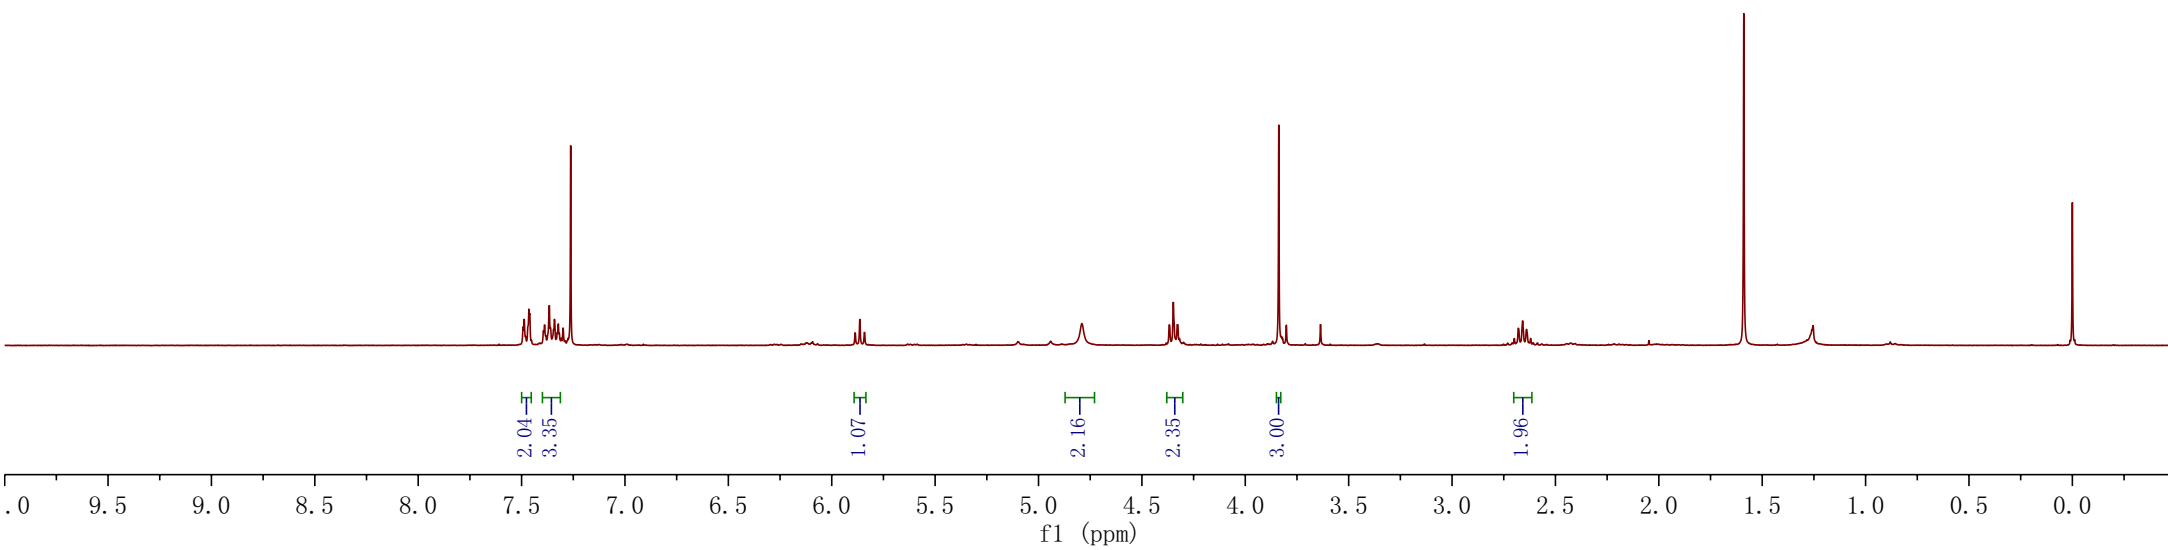



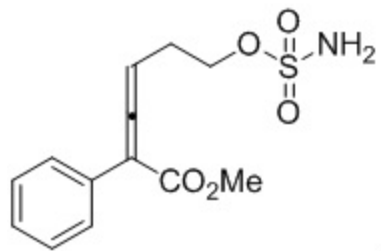

3a'

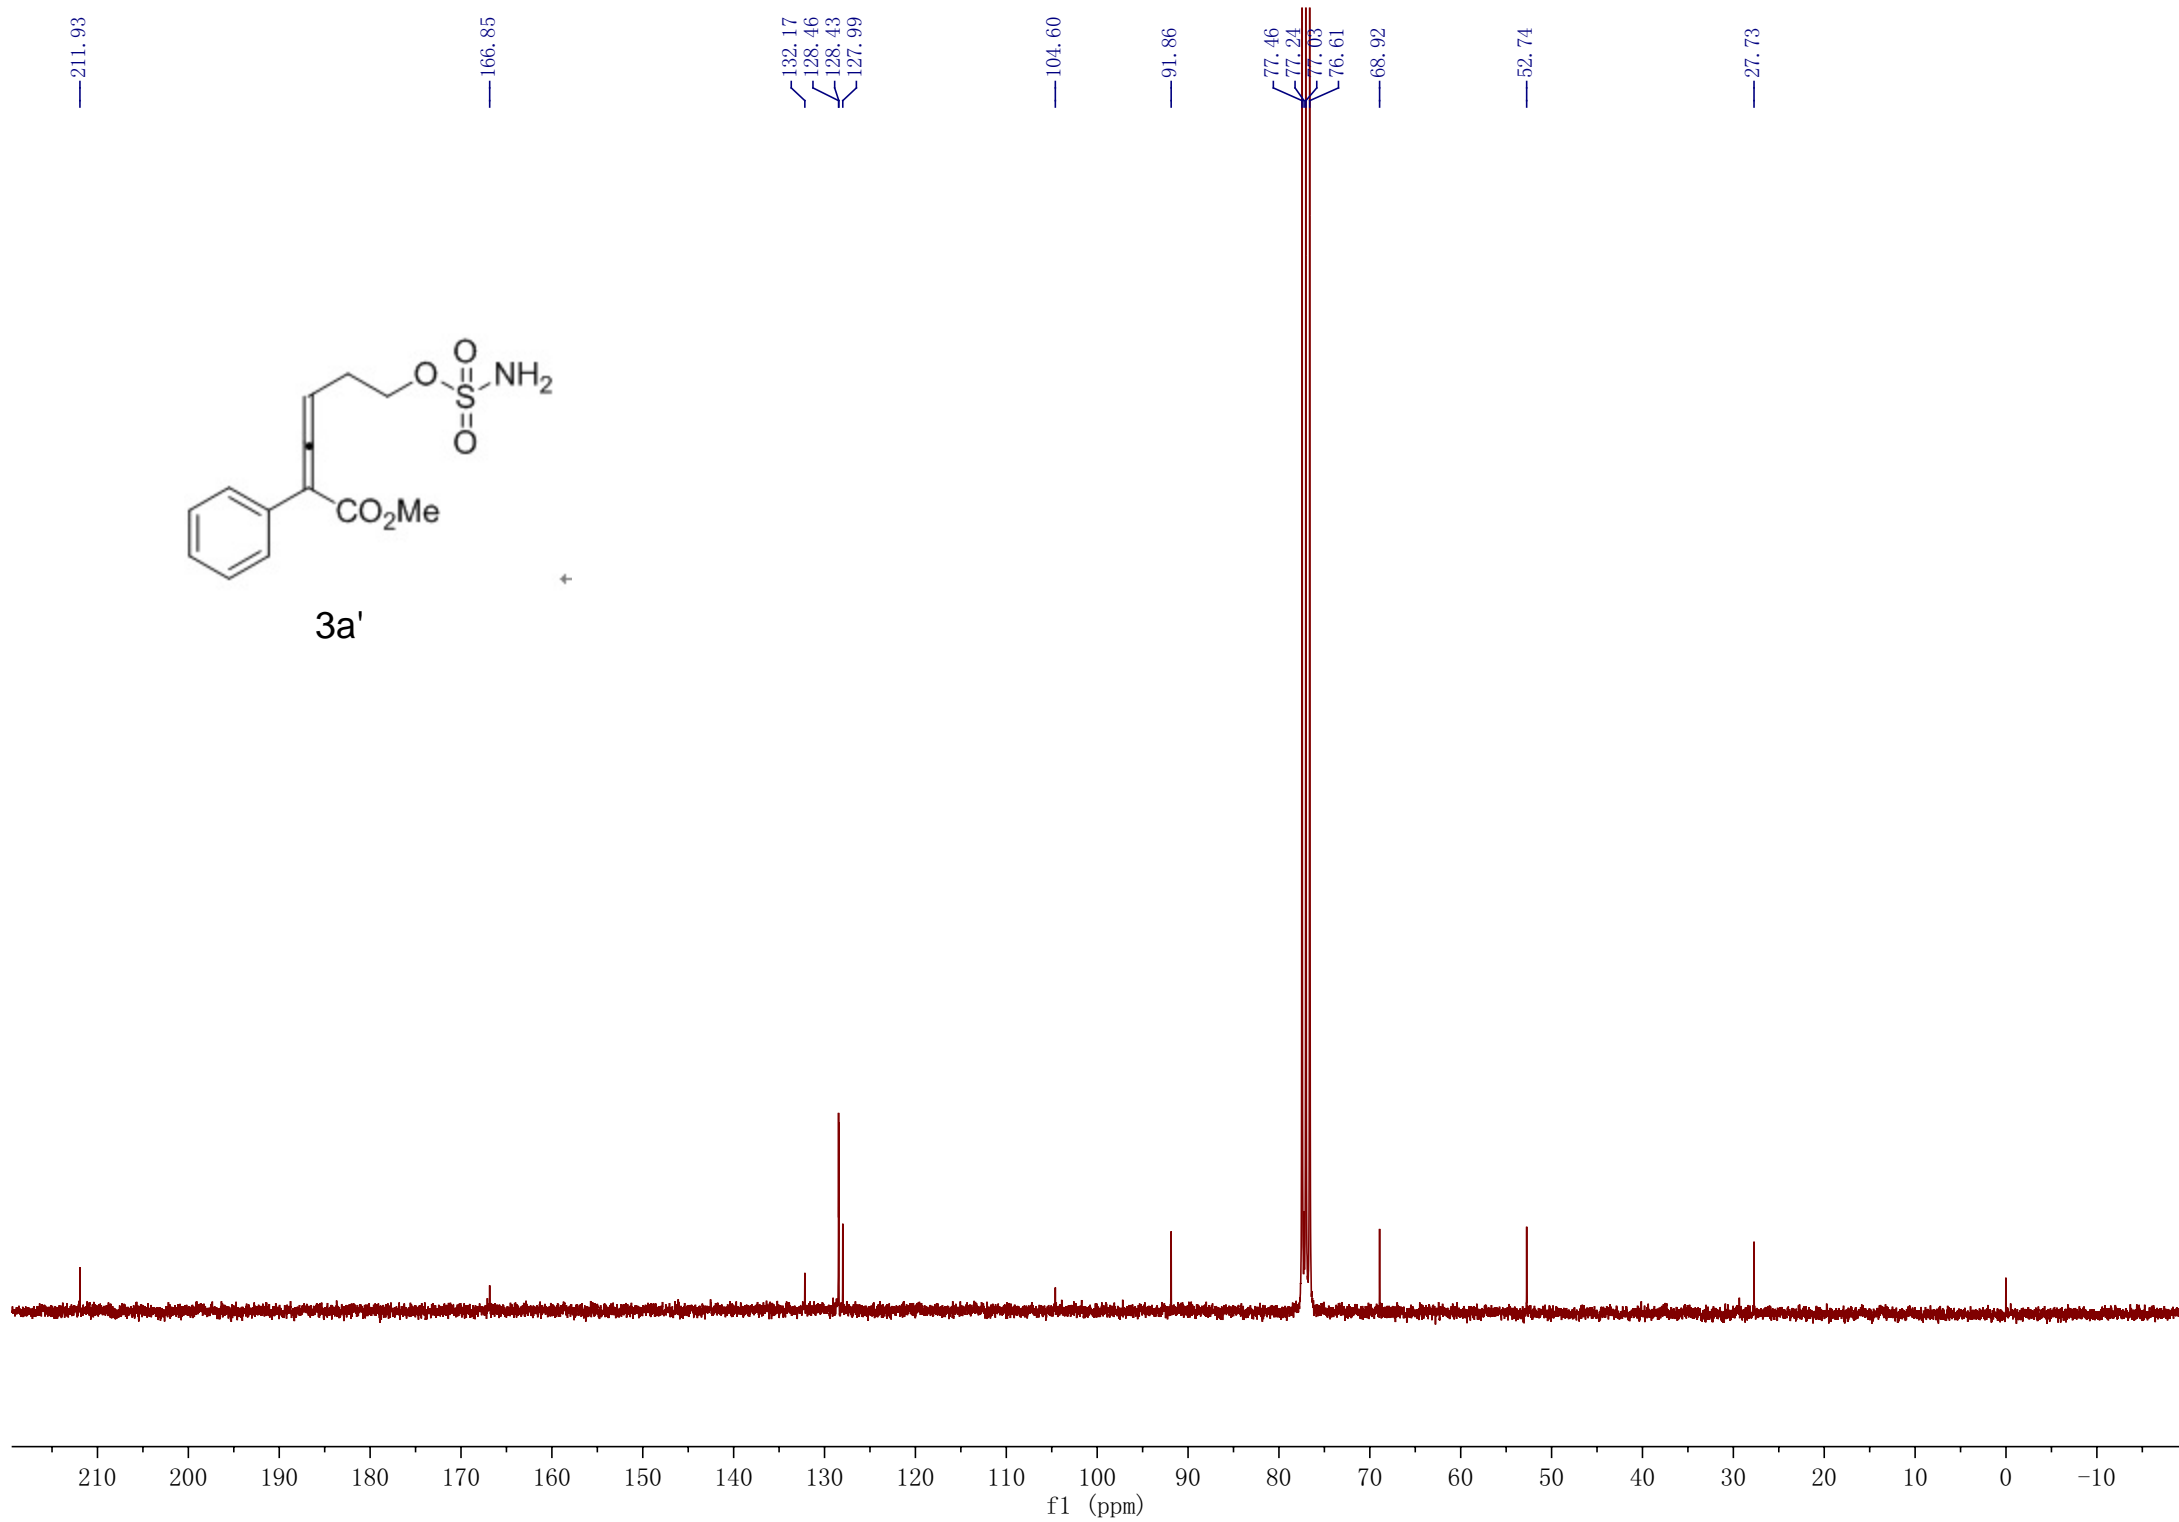

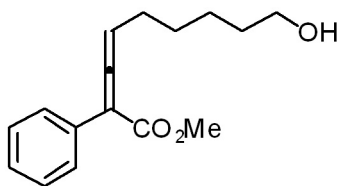

5

7.49  
7.49  
7.47  
7.36  
7.36  
7.34  
7.34  
7.32  
7.29  
7.29  
7.28  
7.27  
7.26

5.83  
5.81  
5.79

3.81  
3.62  
3.61  
3.59

2.27  
2.26  
2.24  
2.22

1.64  
1.58  
1.58  
1.57  
1.56  
1.55  
1.55  
1.53  
1.52  
1.47  
1.46  
1.45  
1.44  
1.43  
1.42  
1.41  
1.33  
1.25  
0.00

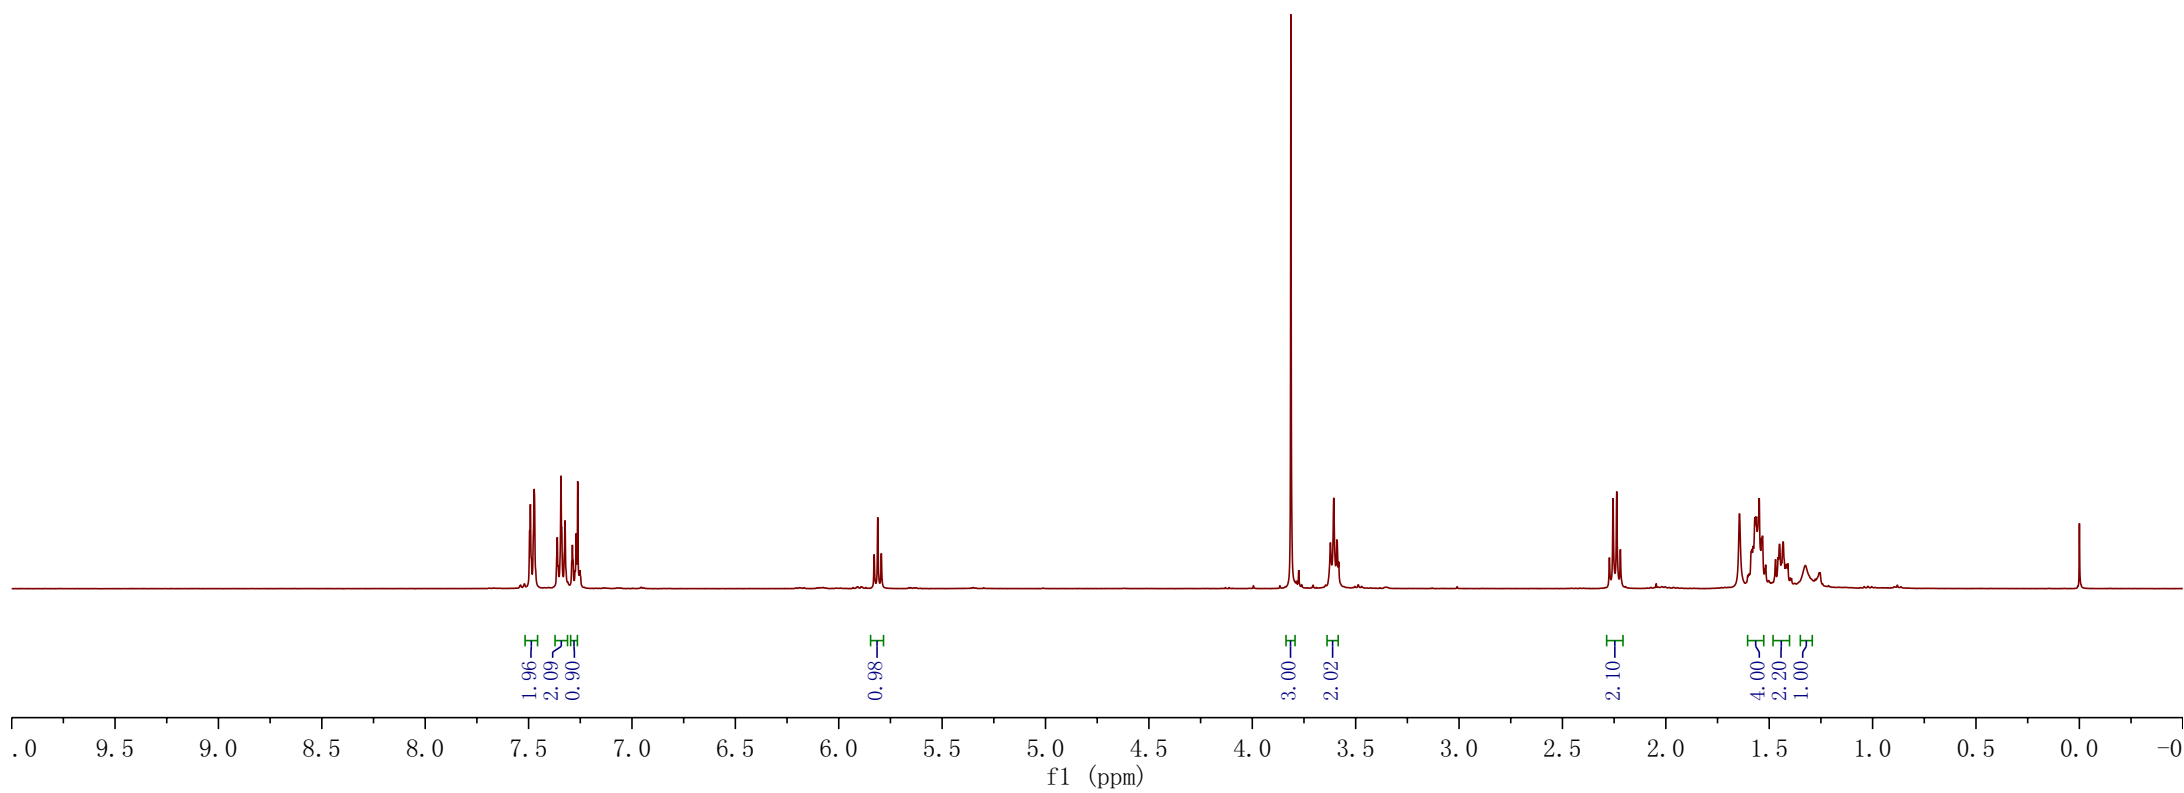

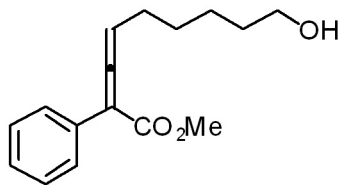

5

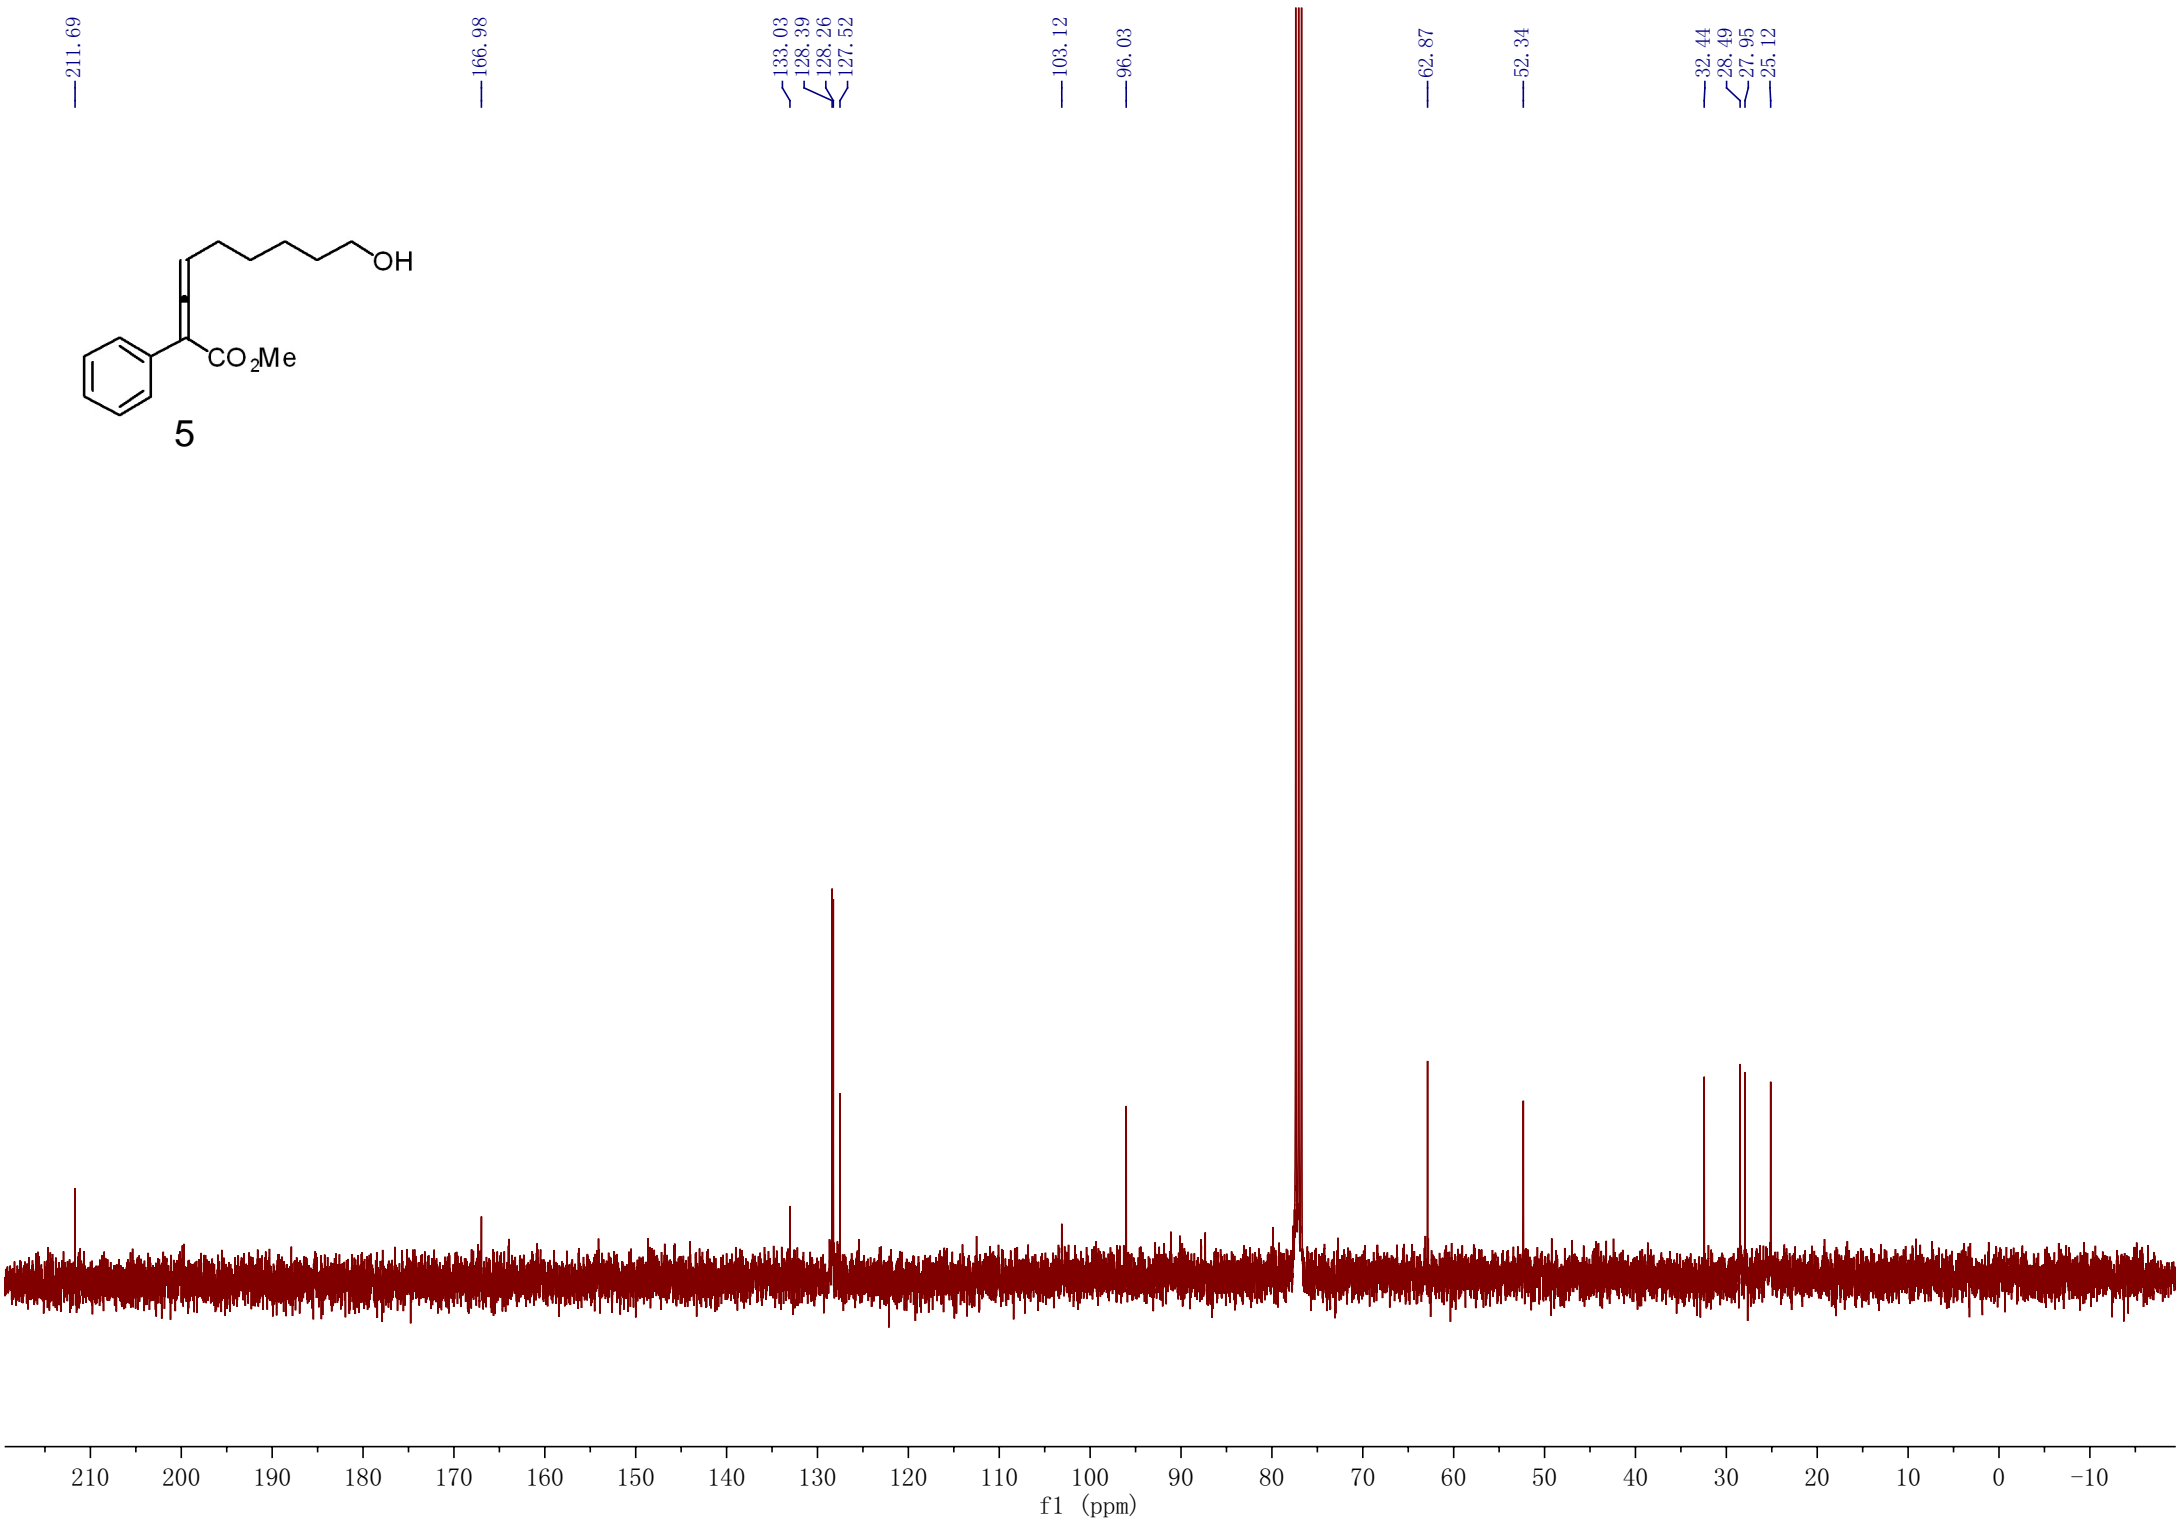

Supplement: c7ob01091e1.pdf [file c7ob01091e1.pdf]
